# Supplementary material for: A Transcriptomic Analysis Reveals Diverse Regulatory Networks That Respond to Cold Stress in Strawberry (Fragaria×ananassa)
Source: Int J Genomics. 2019 Aug 5;2019:7106092. doi: 10.1155/2019/7106092 (PMC6701341; doi:10.1155/2019/7106092)
Supplement: Supplementary 5 — Table S1: genome-wide gene expression profiling and differential expression analysis. [file 7106092.f5.xlsx]

## Sheet: Sheet1
Table S1 Genome-wide gene expression profiling and differential expression analysis
GeneBank	GeneID	Annotation	CK_count	CK_rpkm	T1_count	T1_rpkm	log2fdc	GFOLD	p-value	q-value
XM_004289946.2	101303659	product=early light-induced protein 1%2C chloroplastic-like	131	3.47746	19350	516.31	7.3468	7.06649	0	0
XM_004298166.2	101303325	product=xyloglucan galactosyltransferase KATAMARI1-like	0	0	436	7.21391	8.92257	6.18243	7.45899e-76	1.46397e-74
XM_011460171.1	101308922	product=protein GIGANTEA%2C transcript variant X3	226	1.98216	16785	147.976	6.3595	6.14271	0	0
XM_011460170.1	101308922	product=protein GIGANTEA%2C transcript variant X1	229	1.95635	16889	145.029	6.34947	6.13404	0	0
XM_004290435.2	101308922	product=protein GIGANTEA%2C transcript variant X2	229	1.96546	16885	145.67	6.34913	6.1337	0	0
XM_004308057.2	101298945	product=uncharacterized LOC101298945	22	0.895339	2024	82.797	6.61122	5.9761	0	0
XM_004308359.2	101306283	product=cytochrome P450 71A24-like	25	0.39376	1960	31.0304	6.38801	5.78645	0	0
XM_004292197.1	101313386	product=early light-induced protein 1%2C chloroplastic-like	2	0.124777	413	25.8997	7.2596	5.63912	3.31142e-91	7.73185e-90
XM_004291056.2	101303665	product=uncharacterized LOC101303665	18	0.512898	1325	37.9502	6.27602	5.58213	0	0
XM_004288724.2	101311323	product=protein SRG1-like	23325	509.196	434	9.5234	-5.5937	-5.43521	0	0
XM_011470586.1	101295449	product=two-component response regulator-like PRR95%2C transcript variant X2	93	1.43416	4366	67.6763	5.68892	5.35659	0	0
XM_004306565.2	101295449	product=two-component response regulator-like PRR95%2C transcript variant X1	95	1.43089	4424	66.9786	5.67758	5.34852	0	0
XM_004289971.2	101311527	product=probable glutathione S-transferase%2C transcript variant X1	47	1.37319	2388	70.1305	5.78831	5.33271	0	0
XM_004300668.2	101310030	product=carotenoid 9%2C10(9'%2C10')-cleavage dioxygenase 1-like	20	0.409004	1184	24.3382	5.96943	5.30483	2.46308e-282	1.60748e-280
XM_004307774.2	101308128	product=21 kDa protein-like	46	2.06841	2208	99.797	5.70567	5.24525	0	0
	101301278		1925	76.6501	31	1.24075	-5.76031	-5.21197	0	0
XM_004291315.2	101307658	product=gibberellin-regulated protein 1	666	37.7213	24030	1368.06	5.32214	5.19294	0	0
XM_011465216.1	105351268	product=early nodulin-75-like	588	32.1193	20259	1112.36	5.2553	5.11789	0	0
XM_004289947.2	101303950	product=early light-induced protein 1%2C chloroplastic-like	208	5.42001	7490	196.181	5.31466	5.08727	0	0
XM_011459755.1	101311527	product=probable glutathione S-transferase%2C transcript variant X2	52	1.81222	1958	68.5897	5.35906	4.92222	0	0
XM_004290945.2	101295191	product=uncharacterized LOC101295191	157	12.2906	5007	393.993	5.13732	4.87659	0	0
XM_004292988.2	101291896	product=major latex protein 146-like	113	5.54056	3357	165.45	5.03157	4.72629	0	0
XM_011461547.1	105350130	product=glycine-rich cell wall structural protein 1-like	397	14.436	9518	347.888	4.73105	4.56351	0	0
XM_004307842.2	101305309	product=two-component response regulator-like APRR5	522	8.06327	12251	190.218	4.70114	4.55447	0	0
XM_004309961.2	101311536	product=very-long-chain 3-oxoacyl-CoA reductase 1-like	391	10.6476	5	0.136862	-5.87867	-4.50338	7.61133e-93	1.79867e-91
XM_004289625.2	101299909	product=glycine-rich RNA-binding%2C abscisic acid-inducible protein-like%2C transcript variant X1	1640	71.477	32188	1410.12	4.445	4.36108	0	0
XM_004293959.2	101290738	product=uncharacterized LOC101290738	7853	241.294	147175	4545.53	4.37905	4.34039	0	0
	101292163		543	9.20098	13	0.22142	-5.12903	-4.29804	1.99603e-128	6.2223e-127
XM_004289626.2	101299909	product=glycine-rich RNA-binding%2C abscisic acid-inducible protein-like%2C transcript variant X2	1808	67.748	32915	1239.74	4.3366	4.25647	0	0
XM_011470782.1	101305992	product=cytochrome P450 71A25-like%2C transcript variant X1	11	0.210586	385	7.40861	5.15857	4.19078	3.95847e-81	8.27944e-80
XM_004291393.2	101306591	product=pEARLI1-like lipid transfer protein 1	8221	257.101	138473	4352.95	4.22506	4.18717	0	0
XM_004302990.2	101308886	product=uncharacterized LOC101308886	922	36.2427	30	1.18536	-4.74491	-4.1825	1.18819e-212	6.04471e-211
XM_004305742.2	101299891	product=beta-amyrin synthase-like%2C transcript variant X1	248	3.45846	4705	65.9524	4.39136	4.17966	0	0
XM_011469205.1	101299891	product=beta-amyrin synthase-like%2C transcript variant X3	248	3.32516	4686	63.1541	4.38553	4.1738	0	0
XM_011469204.1	101299891	product=beta-amyrin synthase-like%2C transcript variant X2	247	3.32383	4660	63.0329	4.38331	4.17115	0	0
XM_004289686.2	101293643	product=3-oxo-Delta(4%2C5)-steroid 5-beta-reductase-like	1110	27.0149	41	1.00301	-4.57425	-4.0842	1.77853e-252	1.04442e-250
XM_004294753.2	101292781	product=uncharacterized LOC101292781%2C transcript variant X1	5	0.137274	236	6.51281	5.45486	4.06728	8.45603e-58	1.28254e-56
XM_004308358.2	101305992	product=cytochrome P450 71A25-like%2C transcript variant X2	9	0.196474	337	7.3949	5.23003	4.03911	4.47378e-92	1.05297e-90
XM_011463183.1	101292781	product=uncharacterized LOC101292781%2C transcript variant X2	5	0.139138	228	6.37751	5.40532	4.01666	7.26915e-56	1.06664e-54
XM_004303313.2	101314005	product=cold and drought-regulated protein CORA-like	5	0.28018	218	12.279	5.3409	3.95077	1.95179e-53	2.7196e-52
XM_011467357.1	105351827	product=uncharacterized LOC105351827	5	0.217148	212	9.25466	5.30083	3.90974	5.67261e-52	7.74578e-51
XM_004297384.2	101293874	product=adagio protein 3	468	7.74504	6904	114.846	4.03106	3.87436	0	0
XM_004296828.2	101295036	product=major allergen Pru ar 1-like	57	3.03712	1005	53.826	4.26751	3.8412	3.42962e-218	1.79461e-216
XM_011465036.1	101292161	product=uncharacterized LOC101292161%2C transcript variant X3	139	2.17076	2125	33.3576	4.07572	3.79421	0	0
XM_004288675.2	101292161	product=uncharacterized LOC101292161%2C transcript variant X1	139	2.16709	2125	33.3012	4.07572	3.79421	0	0
XR_905816.1	101292161	product=uncharacterized LOC101292161%2C transcript variant X2	139	2.29109	2116	35.0576	4.0696	3.78805	0	0
XM_004290204.2	101308139	product=uncharacterized protein SLP1%2C transcript variant X1	248	4.43677	3562	64.0543	3.98995	3.77637	0	0
XM_004306681.2	101307045	product=desiccation protectant protein Lea14 homolog	730	26.3369	9816	355.972	3.89842	3.77195	0	0
XM_011459940.1	101308139	product=uncharacterized protein SLP1%2C transcript variant X3	247	4.70905	3503	67.1299	3.97167	3.75757	0	0
XM_004304121.2	101301410	product=late embryogenesis abundant protein 76-like%2C transcript variant X1	2983	151.083	37925	1930.75	3.81895	3.75568	0	0
XM_004295125.2	101311842	product=uncharacterized LOC101311842	52	1.3764	875	23.2803	4.19794	3.75244	1.7176e-188	7.79115e-187
XM_011459941.1	101308139	product=uncharacterized protein SLP1%2C transcript variant X4	250	4.72472	3510	66.6779	3.9572	3.74427	0	0
XM_011459942.1	101308139	product=uncharacterized protein SLP1%2C transcript variant X5	250	4.77365	3509	67.3493	3.95679	3.74386	0	0
XM_011459939.1	101308139	product=uncharacterized protein SLP1%2C transcript variant X2	253	4.33281	3523	60.6458	3.94539	3.73363	0	0
XM_011471996.1	101302316	product=S-type anion channel SLAH2-like%2C transcript variant X1	23	0.355576	447	6.94626	4.37347	3.73309	1.69154e-148	6.01544e-147
XM_011462082.1	105350339	product=protein SRG1-like%2C transcript variant X2	43	0.954535	736	16.4225	4.21717	3.73132	4.90753e-160	1.8749e-158
XM_011472000.1	101302316	product=S-type anion channel SLAH2-like%2C transcript variant X5	19	0.370276	377	7.38503	4.39139	3.6958	6.93452e-100	1.74873e-98
XM_004309665.2	101291010	product=bidirectional sugar transporter SWEET9-like	221	6.66828	3017	91.5032	3.91604	3.6898	0	0
XM_004300249.2	101301974	product=beta-amylase 3%2C chloroplastic	1481	25.6974	18306	319.276	3.77786	3.6883	0	0
XM_011462081.1	105350339	product=protein SRG1-like%2C transcript variant X1	46	0.943324	747	15.398	4.14338	3.67142	2.02932e-159	7.71274e-158
XM_004291535.2	101302722	product=uncharacterized LOC101302722	2109	86.0203	121	4.96077	-3.96121	-3.66177	0	0
XM_004296371.2	101292884	product=MATE efflux family protein 5-like	113	2.13229	1599	30.3289	3.96204	3.65046	0	0
XM_004290089.2	101297791	product=putative lipid-transfer protein DIR1	2062	129.522	120	7.57662	-3.94059	-3.63982	0	0
XM_004291080.2	101310485	product=patatin-like protein 2	9	0.144155	254	4.08941	4.8235	3.62343	2.17734e-60	3.46754e-59
XM_004290520.2	101311341	product=alcohol dehydrogenase	123	3.07681	1689	42.4682	3.91969	3.62008	0	0
	101295616		36	2.20862	587	36.1989	4.1413	3.61361	2.68946e-126	8.3308e-125
XM_004291445.2	101297404	product=uncharacterized LOC101297404	3	0.167092	127	7.11014	5.15108	3.59556	7.91822e-32	7.21031e-31
XM_004300575.2	101302658	product=uncharacterized LOC101302658	4	0.215624	149	8.07351	5.05797	3.58722	7.353e-37	7.38146e-36
XM_004308094.2	101310169	product=3-ketoacyl-CoA synthase 6-like	514	5.99748	24	0.281486	-4.21349	-3.58695	1.72228e-114	4.93333e-113
XM_011472001.1	101302316	product=S-type anion channel SLAH2-like%2C transcript variant X6	18	0.363069	336	6.81232	4.29976	3.58591	7.81254e-85	1.70082e-83
XM_011465217.1	101298879	product=early nodulin-75-like	449	13.2337	5403	160.07	3.73711	3.57597	0	0
XM_011459329.1	101311619	product=arogenate dehydrogenase 1%2C chloroplastic-like%2C transcript variant X2	5091	64.7735	338	4.32265	-3.7578	-3.5743	0	0
XM_004305844.2	101310248	product=UDP-glycosyltransferase 82A1	122	2.8062	2	0.0462412	-5.20647	-3.55702	2.2477e-30	1.95327e-29
XM_004300777.2	101294764	product=uncharacterized LOC101294764	52	2.13511	758	31.2842	3.99111	3.54321	1.8662e-158	7.06528e-157
XM_004301792.2	101293011	product=UPF0392 protein At1g27200	45	0.648895	668	9.68229	4.01338	3.53499	1.74015e-140	5.90182e-139
XM_004300781.1	101295918	product=uncharacterized LOC101295918	122	7.07287	1581	92.1312	3.8361	3.53462	0	0
XM_004297622.2	101295221	product=IAA-amino acid hydrolase ILR1-like 1	3795	80.0046	254	5.3824	-3.74483	-3.534	0	0
XM_011461968.1	101312418	product=internal alternative NAD(P)H-ubiquinone oxidoreductase A1%2C mitochondrial-like	41	0.682193	616	10.3025	4.02789	3.52892	4.53555e-130	1.43371e-128
XM_011466353.1	101294759	product=MADS-box protein AGL24%2C transcript variant X3	273	5.82521	3276	70.2639	3.73121	3.5259	0	0
XM_011466354.1	101294759	product=MADS-box protein AGL24%2C transcript variant X4	273	5.83196	3267	70.1521	3.72724	3.5219	0	0
XM_004299681.2	101294759	product=MADS-box protein AGL24%2C transcript variant X1	274	5.82296	3276	69.9804	3.72595	3.52097	0	0
XM_011466352.1	101294759	product=MADS-box protein AGL24%2C transcript variant X2	279	5.70244	3276	67.3038	3.69996	3.49661	0	0
XM_004305945.2	101297281	product=tricyclene synthase EBOS%2C chloroplastic-like	83	1.5931	1	0.0192932	-5.24124	-3.46185	5.22112e-21	3.46455e-20
XM_011462032.1	101305515	product=uncharacterized LOC101305515	130	5.45936	1562	65.9354	3.72776	3.43433	7.32122e-308	5.2198e-306
XM_004287738.2	101292248	product=GDSL esterase/lipase EXL3-like	1527	36.513	102	2.45159	-3.73985	-3.41344	0	0
XM_011467325.1	105351807	product=uncharacterized LOC105351807	47	2.93227	633	39.6961	3.87445	3.40362	4.67338e-130	1.47569e-128
XM_011465627.1	101294558	product=uncharacterized LOC101294558	134	5.73179	1567	67.3742	3.68897	3.39941	2.56779e-306	1.81749e-304
XM_011467058.1	105351735	product=leucine-rich repeat extensin-like protein 3	2072	58.8583	146	4.16879	-3.66675	-3.39103	0	0
XM_004287424.2	101295447	product=spartin-like	160	3.04567	1824	34.9002	3.65384	3.38755	0	0
XM_004307775.2	101308418	product=21 kDa protein-like	0	0	64	2.69544	6.17345	3.37981	2.81204e-16	1.56448e-15
XM_004302702.2	101296974	product=WAT1-related protein At2g37460-like	157	3.58	4	0.0916816	-4.83077	-3.36229	2.44805e-38	2.5393e-37
XM_004295573.2	101301179	product=uncharacterized LOC101301179	1328	49.4103	12983	485.55	3.4394	3.34392	0	0
XM_004293515.2	101301080	product=polyphenol oxidase%2C chloroplastic-like	8692	150.535	714	12.4295	-3.45276	-3.32442	0	0
XM_004300056.2	101315149	product=cinnamoyl-CoA reductase 2-like	81	2.16735	946	25.4433	3.68075	3.31302	1.08633e-185	4.84516e-184
XM_004297237.2	101300242	product=uncharacterized LOC101300242	2142	41.2639	162	3.13693	-3.56561	-3.30257	0	0
XM_004306070.2	101313632	product=cell division topological specificity factor homolog%2C chloroplastic-like	74	2.10208	0	0	-6.07774	-3.29251	3.52086e-18	2.09528e-17
XM_011471999.1	101302316	product=S-type anion channel SLAH2-like%2C transcript variant X4	63	0.824314	750	9.86399	3.70375	3.2904	4.92817e-75	9.53202e-74
XM_004294274.2	101315216	product=putative beta-glucosidase 41	68	1.386	798	16.3492	3.68461	3.28548	3.43402e-157	1.29175e-155
XM_011471082.1	101312766	product=uncharacterized LOC101312766%2C transcript variant X1	630	7.76635	6032	74.7441	3.40824	3.27029	0	0
XM_004307081.2	101312766	product=uncharacterized LOC101312766%2C transcript variant X2	621	7.93668	5920	76.0515	3.40193	3.26297	0	0
XM_011471084.1	101312766	product=uncharacterized LOC101312766%2C transcript variant X3	599	8.56716	5720	82.2328	3.40431	3.26288	0	0
XM_004289166.2	101315095	product=uncharacterized LOC101315095%2C transcript variant X1	291	6.32272	15	0.327598	-4.03875	-3.26194	0.104986	0.153601
XM_004294663.2	101314164	product=methanol O-anthraniloyltransferase-like	985	22.3912	70	1.59948	-3.64462	-3.25398	9.19205e-200	4.46691e-198
XM_004300503.2	101305563	product=salicylic acid-binding protein 2-like	28	0.498026	372	6.65083	3.83613	3.24013	5.92957e-77	1.17879e-75
XM_004297024.2	101308666	product=late embryogenesis abundant protein%2C group 3	4437	103.741	39079	918.425	3.28953	3.23672	0	0
XM_004301280.2	101296110	product=serine/threonine-protein kinase SAPK2-like	104	2.95656	1115	31.8616	3.56095	3.23288	1.42116e-212	7.21735e-211
XM_004303808.2	101303249	product=protodermal factor 1	454	12.1921	28	0.755822	-3.82066	-3.22975	2.62641e-96	6.49465e-95
	101292761		333	7.57918	19	0.434681	-3.9107	-3.21192	2.72143e-72	5.07291e-71
XM_004298601.2	101311476	product=36.4 kDa proline-rich protein	96	3.13246	2	0.065597	-4.86387	-3.20337	3.0871e-24	2.27175e-23
XM_004296846.2	101300900	product=major allergen Pru av 1-like	20	1.12243	280	15.7952	3.89319	3.20329	3.68968e-59	5.75711e-58
XM_011466341.1	101306242	product=(-)-germacrene D synthase-like%2C transcript variant X1	69	1.21323	0	0	-5.9782	-3.18907	3.67967e-17	2.11588e-16
XM_011471997.1	101302316	product=S-type anion channel SLAH2-like%2C transcript variant X2	51	0.664237	585	7.65858	3.6454	3.18857	5.83186e-115	1.67869e-113
XM_004287701.2	101306557	product=lysine histidine transporter-like 8	217	3.96883	2084	38.3124	3.40873	3.17686	0	0
XM_004301307.2	101306242	product=(-)-germacrene D synthase-like%2C transcript variant X2	68	1.21712	0	0	-5.95745	-3.16747	5.90691e-17	3.36883e-16
XM_004287819.2	101290803	product=dehydrin DHN2-like	12831	411.75	105904	3416.05	3.19603	3.16478	0	0
XM_004296845.2	101300613	product=major allergen Pru av 1-like	193	10.2985	1852	99.3334	3.40681	3.16143	0	0
XM_011471998.1	101302316	product=S-type anion channel SLAH2-like%2C transcript variant X3	49	0.83182	554	9.45327	3.62357	3.15788	1.75472e-108	4.73903e-107
XM_004299052.2	101299958	product=BURP domain-containing protein 3-like	4523	168.967	405	15.2079	-3.32697	-3.15697	0	0
XM_004308862.2	101314900	product=UDP-glycosyltransferase 76F1-like	340	7.76246	21	0.481924	-3.80312	-3.13213	1.41044e-72	2.64598e-71
XM_004296410.2	101309239	product=uncharacterized protein At4g30180-like	816	20.7499	62	1.58473	-3.54583	-3.13128	6.47887e-163	2.52797e-161
XM_004297958.2	101294653	product=probable serine/threonine-protein kinase abkC	129	1.68668	1250	16.4283	3.41758	3.11996	1.08769e-229	5.9575e-228
XM_004307773.2	101307835	product=21 kDa protein	982	36.6478	8243	309.215	3.21916	3.10748	0	0
XR_905906.1	105351443	ncrna_class=lncRNA	1	0.0865532	53	4.61104	4.90597	3.09948	2.99082e-14	1.51077e-13
XM_004300431.2	101307212	product=uncharacterized LOC101307212	247	4.64421	14	0.264596	-3.89623	-3.08494	3.64955e-54	5.14643e-53
XM_011465629.1	101295333	product=uncharacterized LOC101295333	139	5.51686	1303	51.9829	3.37052	3.08283	2.3609e-236	1.32278e-234
XM_004294685.2	101297331	product=expansin-A4-like	218	7.17681	10	0.330913	-4.16428	-3.07947	9.25606e-50	1.21465e-48
XM_011468831.1	101314392	product=glycine-rich protein DC7.1-like	2383	151.492	19028	1215.9	3.14782	3.07555	0	0
XM_004299420.2	101313413	product=lipid transfer protein EARLI 1	198	8.41082	8	0.341588	-4.31562	-3.0682	3.94572e-46	4.88266e-45
XM_004307730.2	101294798	product=ethylene-responsive transcription factor 2-like	130	4.33001	1214	40.6446	3.3644	3.06728	4.96757e-220	2.62752e-218
XM_011467910.1	101296696	product=agamous-like MADS-box protein AGL80	12	0.21437	184	3.304	3.98202	3.06328	2.53197e-40	2.74895e-39
XM_004307265.2	101297775	product=protein NRT1/ PTR FAMILY 7.2-like	763	10.0835	6248	82.9983	3.18306	3.05643	0	0
XM_004302067.2	101299490	product=GDSL esterase/lipase At5g33370-like	17969	478.719	1841	49.3003	-3.13517	-3.05391	0	0
XM_004293114.2	101291700	product=zinc finger CCCH domain-containing protein 46-like	2653	42.5862	247	3.98537	-3.26868	-3.0521	0	0
XM_011467066.1	101312637	product=bidirectional sugar transporter SWEET4%2C transcript variant X2	48	1.37091	505	14.4976	3.51936	3.04743	2.40862e-99	6.05316e-98
XM_011469890.1	105352535	product=uncharacterized LOC105352535	16	0.609449	214	8.19352	3.81181	3.04716	4.06691e-45	4.90624e-44
XM_004287923.2	101300093	product=uncharacterized LOC101300093	3558	178.489	27411	1382.2	3.09634	3.03698	0	0
XM_004302278.2	101314579	product=hydrophobic protein RCI2A	961	50.1894	7647	401.438	3.14205	3.02883	0	0
XM_004302530.2	101293015	product=ferritin-3%2C chloroplastic	121	4.01573	1108	36.9622	3.33538	3.02756	1.80849e-199	8.74493e-198
XM_011470039.1	101313544	product=7-deoxyloganetin glucosyltransferase-like	203	4.34414	1767	38.0087	3.26656	3.02579	0	0
XM_004302206.2	101293987	product=dnaJ homolog subfamily B member 3	136	5.71784	1225	51.7689	3.31279	3.02142	7.14788e-219	3.74695e-217
XM_004306680.2	101306752	product=desiccation protectant protein Lea14 homolog	800	26.3134	6361	210.306	3.14068	3.01676	0	0
XM_004288753.2	101297004	product=phosphatidylinositol/phosphatidylcholine transfer protein SFH12-like	2	0.0350992	69	1.21718	4.6954	3.01472	7.17953e-18	4.22284e-17
XM_004300446.2	101312637	product=bidirectional sugar transporter SWEET4%2C transcript variant X1	52	1.2664	526	12.8763	3.46482	3.00907	9.25488e-97	2.29632e-95
XM_004307731.2	101295082	product=ethylene-responsive transcription factor ERF105-like	865	24.7624	6807	195.872	3.12587	3.00654	0	0
XM_004305991.2	101312373	product=serine carboxypeptidase-like 16%2C transcript variant X3	331	3.86709	23	0.270099	-3.639	-2.991	8.29863e-69	1.47917e-67
XM_004296369.2	101292006	product=pathogenesis-related protein PR-1	1286	35.3594	118	3.26126	-3.2839	-2.9752	3.72755e-241	2.12506e-239
XM_004291494.2	101313090	product=pleiotropic drug resistance protein 2-like	542	4.28208	4241	33.6793	3.1168	2.96661	0	0
XM_004290446.2	101312215	product=ethylene-responsive transcription factor ABR1-like%2C transcript variant X2	26	0.501393	289	5.60199	3.5761	2.95435	3.4951e-57	5.24677e-56
XM_004296840.2	101299175	product=major allergen Pru ar 1-like	942	42.8275	6986	319.257	3.04042	2.92559	0	0
XM_004296756.2	101298010	product=monothiol glutaredoxin-S2-like	59	3.04256	552	28.6131	3.35532	2.92365	3.24148e-101	8.25958e-100
XM_004290445.2	101312215	product=ethylene-responsive transcription factor ABR1-like%2C transcript variant X1	27	0.511055	291	5.53651	3.53355	2.92113	5.33838e-57	7.98115e-56
XM_004293106.2	101313869	product=probable inactive 2-oxoglutarate-dependent dioxygenase AOP2	111	2.76912	949	23.7971	3.23551	2.91345	2.00512e-166	8.02677e-165
XM_011465774.1	101315095	product=uncharacterized LOC101315095%2C transcript variant X2	219	4.82083	14	0.309774	-3.72339	-2.90757	4.85027e-47	6.12091e-46
XM_004306310.2	101298454	product=high affinity nitrate transporter 2.7	178	3.0813	1442	25.091	3.16212	2.90449	5.71953e-246	3.2992e-244
XM_004298734.2	101300909	product=thaumatin-like protein 1	41	1.47487	400	14.4633	3.40622	2.89657	5.00045e-75	9.66545e-74
XM_004293578.2	101295112	product=protein TIFY 5A	78	3.33642	2	0.0859914	-4.56774	-2.89532	7.22548e-20	4.62188e-19
XM_004301995.2	101302084	product=probable aldo-keto reductase 1	539	14.4853	46	1.24261	-3.37115	-2.89255	1.14039e-104	2.98632e-103
XM_004304097.2	101294384	product=allene oxide cyclase 4%2C chloroplastic-like	2003	93.25	207	9.68673	-3.11715	-2.88002	0	0
XM_004287815.2	101314123	product=dehydrin Xero 2	55457	1716.87	369806	11507.9	2.88838	2.87313	0	0
XM_004300044.2	101311965	product=uncharacterized transporter YBR287W-like	14	0.303828	174	3.79567	3.6954	2.86927	2.70182e-36	2.68651e-35
XM_004290115.2	101305322	product=putative glycine-rich cell wall structural protein 1	511	18.7664	44	1.62424	-3.35707	-2.86836	4.66634e-99	1.1697e-97
XM_011472446.1	101299342	product=1-aminocyclopropane-1-carboxylate oxidase homolog 1-like	221	5.42519	15	0.370129	-3.64334	-2.8571	8.33434e-47	1.04502e-45
XM_004294607.2	101295024	product=transcription factor PCL1%2C transcript variant X1	17	0.437722	196	5.07277	3.60321	2.85391	1.20146e-14	6.18959e-14
XM_011472566.1	101294130	product=nuclear pore complex protein NUP98B-like%2C transcript variant X3	55	0.925578	0	0	-5.65628	-2.8525	3.16848e-14	1.59817e-13
XM_011472565.1	101294130	product=nuclear pore complex protein NUP98B-like%2C transcript variant X2	55	0.948523	0	0	-5.65628	-2.8525	3.16848e-14	1.59817e-13
XM_004309457.2	101294130	product=nuclear pore complex protein NUP98B-like%2C transcript variant X1	55	0.924313	0	0	-5.65628	-2.8525	3.16848e-14	1.59817e-13
XM_004304953.1	101297173	product=uncharacterized LOC101297173	55	1.29996	0	0	-5.65628	-2.8525	3.16848e-14	1.59817e-13
XM_004309323.2	101310077	product=1-aminocyclopropane-1-carboxylate oxidase homolog 1-like	220	5.40065	15	0.370129	-3.63682	-2.85042	1.49612e-46	1.86398e-45
XM_004300399.2	101297546	product=uncharacterized LOC101297546	1199	32.293	8284	224.269	2.93855	2.83613	0	0
XM_004288387.2	101298064	product=uncharacterized LOC101298064	58679	930.578	7197	114.726	-2.87612	-2.83442	0	0
XM_004294167.2	101306413	product=uncharacterized LOC101306413	550	30.961	50	2.82918	-3.2824	-2.82039	1.28003e-104	3.349e-103
XM_011467322.1	105351804	product=uncharacterized LOC105351804	12403	297.734	1485	35.8317	-2.91022	-2.81913	0	0
XM_004299036.2	101293783	product=MADS-box protein SVP-like%2C transcript variant X2	475	15.9654	3371	113.89	2.97565	2.81444	0	0
XM_004299492.2	101310899	product=uncharacterized GPI-anchored protein At4g28100	2279	51.0204	251	5.64823	-3.02646	-2.80972	0	0
XM_011469525.1	105352423	product=uncharacterized LOC105352423	39	2.51838	361	23.4317	3.329	2.80585	1.41483e-66	2.44594e-65
XM_004290765.2	101313949	product=sucrose synthase 2	7560	95.7903	48866	622.366	2.84329	2.80201	0	0
XM_011466005.1	101311863	product=glycerophosphodiester phosphodiesterase GDPD5%2C transcript variant X2	3076	76.2213	351	8.74251	-2.9768	-2.7923	0	0
XM_011465286.1	101307690	partial=true	1004	19.8069	103	2.04249	-3.12146	-2.79024	2.42552e-181	1.05609e-179
XM_004296758.2	101298593	product=monothiol glutaredoxin-S2	30	2.72451	289	26.3818	3.37679	2.78877	1.82277e-54	2.58407e-53
XM_004307732.2	101295372	product=ethylene-responsive transcription factor ERF106-like	610	15.7175	4197	108.7	2.93154	2.78864	0	0
XM_011465813.1	101293783	product=MADS-box protein SVP-like%2C transcript variant X1	496	16.0565	3446	112.13	2.9451	2.78705	0	0
XM_011465450.1	105349264	product=flavonoid 3'%2C5'-hydroxylase-like	20	0.760241	211	8.062	3.48668	2.78614	1.58292e-41	1.763e-40
XM_004288273.2	101309193	product=zeaxanthin epoxidase%2C chloroplastic-like	85	1.90407	687	15.4689	3.15108	2.78419	3.93031e-118	1.1517e-116
XM_004303538.2	101314106	product=zinc finger protein CONSTANS-LIKE 9	720	11.4479	4893	78.2	2.91402	2.7822	0	0
XM_004299250.2	101311863	product=glycerophosphodiester phosphodiesterase GDPD5%2C transcript variant X1	3037	79.2493	350	9.18032	-2.9625	-2.77764	0	0
XM_004287686.2	101301422	product=dehydrodolichyl diphosphate synthase 6-like	718	16.8409	71	1.67393	-3.16884	-2.77475	4.76953e-132	1.52412e-130
XM_004295246.2	101305153	product=uncharacterized LOC101305153	16	0.84038	178	9.39756	3.54743	2.77467	6.63627e-36	6.56525e-35
XM_011460918.1	101294912	product=3-ketoacyl-CoA synthase 11-like%2C transcript variant X1	149	2.46916	7	0.1166	-4.07774	-2.7745	2.0112e-33	1.89134e-32
XM_011458951.1	105353455	product=uncharacterized LOC105353455	12	0.785897	151	9.94033	3.69857	2.76898	7.90207e-32	7.19783e-31
XM_011472063.1	101294513	product=low-temperature-induced 65 kDa protein%2C transcript variant X1	3189	47.547	20347	304.936	2.82434	2.76089	0	0
XM_011472065.1	101294513	product=low-temperature-induced 65 kDa protein%2C transcript variant X2	3187	47.5749	20327	305.006	2.82382	2.76036	0	0
XM_011472066.1	101294513	product=low-temperature-induced 65 kDa protein%2C transcript variant X3	3182	47.558	20292	304.851	2.8236	2.76009	0	0
XM_004290349.2	101304727	product=cold-regulated 413 plasma membrane protein 1	2892	123.848	18452	794.278	2.8243	2.7577	0	0
XM_004305711.2	101312755	product=uncharacterized LOC101312755	71	0.937975	2	0.0265584	-4.43388	-2.75522	3.86433e-18	2.29456e-17
XM_004300413.2	101301874	product=E3 ubiquitin-protein ligase MARCH2-like	37	1.47967	334	13.426	3.29117	2.7544	3.88212e-61	6.26419e-60
XM_004298245.2	101309345	product=aluminum-activated malate transporter 4-like	1	0.0172298	42	0.727391	4.57734	2.75139	1.47169e-11	6.44715e-11
XM_004298847.2	101312151	product=ethylene-responsive transcription factor ERF061	76	1.5814	609	12.7375	3.13696	2.74991	1.53155e-104	3.99992e-103
XM_011472069.1	101294513	product=low-temperature-induced 65 kDa protein%2C transcript variant X6	3131	48.3844	19829	308.008	2.81361	2.74955	0	0
XM_004307921.2	101307632	product=cyclic nucleotide-gated ion channel 1-like	833	11.0165	86	1.14324	-3.10988	-2.74897	1.92422e-150	6.91845e-149
XM_011460919.1	101294912	product=3-ketoacyl-CoA synthase 11-like%2C transcript variant X2	145	2.48093	7	0.120388	-4.03875	-2.73396	1.93345e-34	1.8594e-33
XM_011471913.1	101313169	product=cyclic nucleotide-gated ion channel 1-like%2C transcript variant X2	3664	52.0408	443	6.32457	-2.8941	-2.72888	0	0
XM_004298600.2	101311189	product=14 kDa proline-rich protein DC2.15	6	0.263998	107	4.7323	4.09861	2.72756	7.11221e-25	5.31928e-24
XM_004294034.2	101313777	product=uncharacterized LOC101313777	1488	24.2444	9442	154.636	2.81598	2.72339	0	0
XM_011471912.1	101313169	product=cyclic nucleotide-gated ion channel 1-like%2C transcript variant X1	3647	52.5483	443	6.41602	-2.8874	-2.72212	0	0
XM_004293519.2	101302240	product=NAC transcription factor 25	16	0.336728	171	3.61738	3.48988	2.71514	4.00542e-34	3.82315e-33
XR_903954.1	101295283	ncrna_class=lncRNA	509	26.5831	50	2.62481	-3.17085	-2.70691	2.09274e-94	5.05136e-93
XM_004296760.2	101299174	product=monothiol glutaredoxin-S2-like	52	3.16391	428	26.176	3.16799	2.70644	6.53908e-75	1.25979e-73
XM_011466272.1	101309348	product=phosphoglycerate mutase%2C transcript variant X2	800	19.179	85	2.04831	-3.06832	-2.70481	5.72186e-143	1.96793e-141
XM_004301300.2	101303619	product=uncharacterized LOC101303619	2400	15.7403	287	1.89201	-2.90842	-2.70438	0	0
XM_004291018.2	101292566	product=uncharacterized LOC101292566	3593	239.566	21867	1465.54	2.75624	2.69624	0	0
XM_004301190.1	101314284	product=uncharacterized LOC101314284	5931	146.083	756	18.7168	-2.81908	-2.69155	0	0
XM_004289735.2	101309886	product=ABC transporter G family member 4-like	3244	50.9854	401	6.33503	-2.86187	-2.68818	0	0
XM_004304283.2	101302853	product=UDP-glycosyltransferase 73D1	502	8.73094	50	0.87411	-3.15091	-2.6866	1.14212e-92	2.69465e-91
XM_004301109.2	101312063	product=myb-related protein 308-like	49	1.89781	0	0	-5.49278	-2.6802	6.31816e-13	2.98566e-12
XM_004307669.2	101299422	product=pseudouridine-5'-monophosphatase%2C transcript variant X5	557	6.93367	3552	44.4447	2.82178	2.67157	0	0
XM_011471670.1	101299422	product=pseudouridine-5'-monophosphatase%2C transcript variant X4	557	7.44653	3551	47.7187	2.82137	2.67116	0	0
XM_011471669.1	101299422	product=pseudouridine-5'-monophosphatase%2C transcript variant X3	557	7.05272	3551	45.1951	2.82137	2.67116	0	0
XM_011471668.1	101299422	product=pseudouridine-5'-monophosphatase%2C transcript variant X2	560	7.12742	3554	45.4675	2.81486	2.66499	0	0
XM_011471667.1	101299422	product=pseudouridine-5'-monophosphatase%2C transcript variant X1	560	6.76766	3554	43.1725	2.81486	2.66499	0	0
XM_004293539.2	101308352	product=stem-specific protein TSJT1-like	513	17.8277	3270	114.226	2.82097	2.66457	0	0
XM_004304593.2	101300837	product=glutaredoxin	871	52.1351	5410	325.498	2.78457	2.66378	0	0
XM_004299617.2	101300444	product=serine/threonine-protein kinase SAPK2-like	538	12.3904	3417	79.1017	2.81587	2.66304	0	0
XM_004308096.2	101311048	product=cytochrome P450 704C1-like	2027	42.0354	247	5.1487	-2.88057	-2.66086	0	0
XM_004287918.2	101298644	product=probable inactive 2-oxoglutarate-dependent dioxygenase AOP2	48	1.22906	387	9.96049	3.13628	2.65657	2.63999e-67	4.624e-66
XM_011459732.1	105349632	product=uncharacterized LOC105349632%2C transcript variant X2	33	0.386397	285	3.35432	3.22349	2.65631	2.86986e-51	3.87537e-50
XM_004298723.2	101298019	product=dehydration-responsive element-binding protein 1E	19	0.482149	186	4.74438	3.37604	2.65599	6.95958e-36	6.88278e-35
XR_904073.1	105349632	product=uncharacterized LOC105349632%2C transcript variant X3	33	0.406945	284	3.5203	3.21843	2.65112	2.86986e-51	3.87537e-50
XM_011459734.1	105349632	product=uncharacterized LOC105349632%2C transcript variant X5	33	0.446028	284	3.85839	3.21843	2.65112	1.62086e-51	2.19686e-50
XM_011459731.1	105349632	product=uncharacterized LOC105349632%2C transcript variant X1	33	0.430866	284	3.72723	3.21843	2.65112	2.86986e-51	3.87537e-50
XM_004290195.2	101305229	product=leucine-rich repeat receptor-like serine/threonine-protein kinase BAM3	2040	25.6542	12107	153.04	2.71969	2.6401	0	0
XM_004296827.2	101294749	product=major allergen Pru ar 1-like	1	0.044531	39	1.74569	4.47301	2.63988	8.25976e-11	3.45519e-10
XM_004294727.2	101310098	product=zinc finger protein CONSTANS-LIKE 7	300	9.98331	1938	64.8255	2.83856	2.63545	2.08439e-294	1.41386e-292
XM_004305999.1	101315266	product=uncharacterized LOC101315266	6041	139.825	806	18.7522	-2.75331	-2.62939	0	0
XM_004290334.2	101299254	product=uncharacterized LOC101299254	181	7.2227	1211	48.5741	2.88646	2.62759	2.37511e-188	1.0757e-186
XM_011468431.1	101302176	product=boron transporter 4-like%2C transcript variant X2	11	0.155996	133	1.89588	3.63221	2.61845	6.32466e-28	5.15669e-27
	101308511		222	6.54318	19	0.562896	-3.32789	-2.61561	3.74734e-44	4.4349e-43
XM_004291307.2	101305236	product=chaperone protein dnaJ 11%2C chloroplastic-like	2523	117.607	14544	681.459	2.67782	2.60602	0	0
XM_004302697.2	101295243	product=short-chain dehydrogenase TIC 32%2C chloroplastic	907	22.2654	106	2.61558	-2.934	-2.60481	1.33579e-155	4.98632e-154
XM_011463150.1	101314553	product=UDP-glycosyltransferase 87A1-like	64	1.1367	2	0.0357055	-4.28633	-2.60007	2.1496e-16	1.20163e-15
XM_004297056.2	101293289	product=solute carrier family 25 member 44-like	48	1.06042	372	8.26074	3.0794	2.59835	1.24946e-63	2.08978e-62
XM_004302886.2	101302176	product=boron transporter 4-like%2C transcript variant X1	11	0.136838	131	1.63804	3.61051	2.59569	2.05981e-27	1.6514e-26
XM_004287257.2	101292625	product=EPIDERMAL PATTERNING FACTOR-like protein 8	318	13.762	31	1.34851	-3.16633	-2.58916	7.64208e-60	1.20396e-58
XM_011463409.1	101291507	product=uncharacterized LOC101291507%2C transcript variant X2	46	0.783417	1	0.0171188	-4.40351	-2.58569	NA	NA
XM_004294981.2	101291507	product=uncharacterized LOC101291507%2C transcript variant X1	46	0.783417	1	0.0171188	-4.40351	-2.58569	2.10068e-12	9.64905e-12
XM_004306000.1	101290690	product=uncharacterized LOC101290690	3939	90.8302	531	12.3077	-2.73762	-2.58542	0	0
XM_004299567.2	101309348	product=phosphoglycerate mutase%2C transcript variant X1	865	17.6698	102	2.09438	-2.92064	-2.58519	6.47811e-148	2.29261e-146
XM_011465419.1	105351392	partial=true	1330	46.9725	166	5.89304	-2.84351	-2.57689	1.29431e-220	6.87088e-219
XM_004292014.2	101311072	product=UDP-glycosyltransferase 74F2-like	63	1.35132	2	0.0431207	-4.26396	-2.57648	3.82915e-16	2.1227e-15
XM_004301204.2	101293889	product=thaumatin-like protein	233	5.71977	21	0.518181	-3.25985	-2.57628	1.6528e-45	2.018e-44
XM_004298710.2	101294363	product=probable phospholipid hydroperoxide glutathione peroxidase	1332	55.4324	7655	320.216	2.67299	2.57447	0	0
XM_011461490.1	105350098	partial=true	1000	60.6442	122	7.43684	-2.87363	-2.56499	3.96779e-168	1.60591e-166
XM_004304258.2	101293325	product=gibberellin-regulated protein 6-like	9524	537.773	1359	77.1327	-2.65703	-2.56085	0	0
XM_004290192.2	101304340	product=uncharacterized LOC101304340	1515	60.9832	195	7.8899	-2.80027	-2.55308	2.11289e-247	1.22602e-245
XM_004300844.2	101292607	product=U-box domain-containing protein 19-like	30	0.408777	246	3.3693	3.14525	2.55083	9.36216e-44	1.09517e-42
XM_004303435.2	101305861	product=17.9 kDa class II heat shock protein-like	2912	138.186	396	18.8889	-2.72422	-2.54842	0	0
XM_004303678.2	101309652	product=dnaJ homolog subfamily B member 6%2C transcript variant X2	261	7.56565	1602	46.6775	2.76421	2.54603	1.20527e-234	6.67639e-233
XM_004309165.2	101292653	product=WD repeat-containing protein RUP2	4	0.0730494	74	1.3584	4.05797	2.54268	8.37465e-18	4.91394e-17
XM_011459885.1	101308839	product=probable LRR receptor-like serine/threonine-protein kinase At5g48740	260	2.32911	25	0.225111	-3.17639	-2.54122	1.7115e-49	2.22898e-48
XM_011469159.1	101309652	product=dnaJ homolog subfamily B member 6%2C transcript variant X1	260	7.56044	1591	46.5032	2.7598	2.54115	1.1156e-236	6.26253e-235
XM_004289389.2	101300486	product=3'-N-debenzoyl-2'-deoxytaxol N-benzoyltransferase	178	4.36671	15	0.369883	-3.33274	-2.53709	6.53011e-36	6.4624e-35
XM_011464575.1	101311561	product=pto-interacting protein 1%2C transcript variant X2	839	19.1907	4775	109.784	2.65842	2.53456	0	0
XM_004297034.2	101311561	product=pto-interacting protein 1%2C transcript variant X1	840	19.0833	4777	109.086	2.65731	2.53351	0	0
XM_004307757.2	101302788	product=beta-fructofuranosidase%2C soluble isoenzyme I-like	579	9.18224	67	1.06803	-2.94137	-2.53267	1.80421e-100	4.57738e-99
XR_183917.2	101309015	product=3-hydroxy-3-methylglutaryl-coenzyme A reductase 1-like	322	5.11313	1927	30.7575	2.72858	2.53122	5.43912e-280	3.51838e-278
XM_011460073.1	105349697	product=uncharacterized LOC105349697	280	14.0847	1687	85.2989	2.73775	2.5266	2.19028e-246	1.26591e-244
XM_004307700.2	101309971	product=60S ribosomal protein L10	200	7.88699	18	0.713498	-3.25205	-2.5203	2.50214e-39	2.66039e-38
XM_004301557.2	101298030	product=uncharacterized LOC101298030	506	6.74027	58	0.776594	-2.95212	-2.51513	2.13135e-88	4.83024e-87
XM_011459532.1	101307753	product=serine carboxypeptidase-like 18	271	4.31071	27	0.4317	-3.12903	-2.51403	7.17652e-51	9.60684e-50
XM_004306505.2	101301811	product=metal tolerance protein 10	766	16.1208	4287	90.6884	2.63408	2.50437	0	0
XM_004291982.2	101299447	product=polyphenol oxidase I%2C chloroplastic-like	15	0.29896	142	2.84478	3.31095	2.5031	1.83388e-27	1.4747e-26
XM_004308003.2	101307345	product=heat shock protein 83	1402	21.091	186	2.81256	-2.75633	-2.50294	8.97468e-226	4.85212e-224
XM_004300778.2	101295050	product=uncharacterized LOC101295050	20	0.634624	174	5.54977	3.20997	2.50031	3.19843e-32	2.94173e-31
XM_011462280.1	101306603	product=MLO-like protein 12%2C transcript variant X2	2	0.0376434	49	0.92703	4.20997	2.50028	9.05327e-13	4.23613e-12
XM_004293852.2	101306603	product=MLO-like protein 12%2C transcript variant X1	2	0.037605	49	0.926085	4.20997	2.50028	1.99675e-10	8.17875e-10
XM_004309745.2	101302420	product=cytochrome P450 71A26-like	197	3.4086	18	0.313055	-3.23035	-2.49794	1.41505e-38	1.47668e-37
XM_011472691.1	101311436	product=protein indeterminate-domain 2-like	43	0.634193	0	0	-5.30835	-2.48457	1.34755e-11	5.91304e-11
XM_004291305.2	101304644	product=thaumatin-like protein 1b	328	6.37528	1889	36.906	2.67331	2.47712	4.36578e-268	2.73941e-266
XM_004304974.1	101304116	product=uncharacterized LOC101304116	2	0.10285	48	2.48116	4.18083	2.46906	1.64345e-12	7.59649e-12
XM_004297307.2	101295706	product=heavy metal-associated isoprenylated plant protein 26-like	2	0.102707	48	2.4777	4.18083	2.46906	1.64345e-12	7.59649e-12
XM_004309208.2	101306579	product=cytochrome P450 704C1-like	860	18.3399	112	2.4008	-2.77861	-2.45573	1.52913e-140	5.19212e-139
XR_184554.2	101313303	product=nicotinamidase 2-like	2919	80.0211	425	11.7111	-2.62596	-2.45536	0	0
XM_004302569.2	101304013	product=abscisic acid receptor PYL4	28	0.857481	218	6.71061	3.06788	2.45226	4.21707e-38	4.34962e-37
XM_004292553.2	101292481	product=EID1-like F-box protein 3	51	1.82215	352	12.6414	2.91416	2.44241	5.09019e-57	7.61397e-56
XM_004302775.2	101293504	product=uncharacterized LOC101293504	572	14.1833	71	1.76962	-2.84139	-2.44187	2.89584e-96	7.15486e-95
XM_004302198.2	101291157	product=universal stress protein A-like protein%2C transcript variant X1	211	8.23272	1224	48.0045	2.68172	2.43871	3.08319e-175	1.30183e-173
XM_011471916.1	101307343	product=wall-associated receptor kinase 1-like%2C transcript variant X2	1810	24.6538	258	3.53235	-2.65468	-2.43739	2.18653e-280	1.42066e-278
XM_011471597.1	101297192	product=auxin transporter-like protein 2%2C transcript variant X2	465	7.38705	56	0.894221	-2.88022	-2.43459	1.10929e-79	2.27153e-78
XM_004307577.2	101297192	product=auxin transporter-like protein 2%2C transcript variant X1	464	7.46117	56	0.905141	-2.87712	-2.43143	1.93944e-79	3.95761e-78
XM_004290582.2	101306192	product=chlorophyllase-1	343	9.04002	1908	50.5467	2.62341	2.43093	8.26047e-265	5.05337e-263
XM_004302555.2	101300159	product=tryptophan synthase alpha chain-like	107	2.10302	6	0.118536	-3.79645	-2.42541	1.77975e-24	1.31564e-23
XM_004292319.2	101305633	product=purple acid phosphatase 15	210	3.38125	1207	19.5346	2.66838	2.42462	7.74741e-172	3.22017e-170
XM_004302199.2	101291157	product=universal stress protein A-like protein%2C transcript variant X2	208	8.32715	1196	48.1287	2.66893	2.42404	2.46733e-170	1.01975e-168
XM_011472777.1	105353525	product=uncharacterized LOC105353525	106	7.87984	6	0.448334	-3.78303	-2.4113	3.20673e-24	2.35919e-23
XM_004307920.2	101307343	product=wall-associated receptor kinase 1-like%2C transcript variant X1	1744	19.9084	253	2.90302	-2.62925	-2.40961	1.01877e-267	6.37884e-266
XM_004297092.2	101305654	product=AP2/ERF and B3 domain-containing transcription repressor TEM1-like	492	11.3736	2631	61.1353	2.56758	2.40572	0	0
XM_011462060.1	101299453	product=(3S%2C6E)-nerolidol synthase 1	2234	47.0693	332	7.03124	-2.5956	-2.40285	0	0
XM_004291810.2	101293459	product=bifunctional dihydroflavonol 4-reductase/flavanone 4-reductase	9462	256.718	1517	41.3712	-2.48905	-2.39722	0	0
XM_004292879.2	101303092	product=high mobility group B protein 9	161	2.93733	15	0.275079	-3.18877	-2.38803	1.23014e-31	1.11462e-30
XM_004301595.2	101312548	product=4-coumarate--CoA ligase-like 6	443	7.13593	55	0.890531	-2.83598	-2.38567	5.63879e-75	1.08849e-73
XM_011462027.1	105350317	product=calcium-binding protein PBP1-like	16	0.826256	137	7.11139	3.17214	2.38502	1.46333e-25	1.11608e-24
XM_011459198.1	101307273	product=uncharacterized LOC101307273%2C transcript variant X1	312	4.91412	36	0.569945	-2.92949	-2.3845	1.41297e-54	2.007e-53
XM_011472643.1	105353463	product=probable leucine-rich repeat receptor-like serine/threonine-protein kinase At3g14840%2C transcript variant X1	489	5.29057	62	0.674255	-2.80828	-2.38189	8.97361e-82	1.88497e-80
XM_004306646.2	101296802	product=probable indole-3-acetic acid-amido synthetase GH3.5%2C transcript variant X1	23823	402.748	3956	67.2253	-2.43886	-2.38162	0	0
XM_011470645.1	101296802	product=probable indole-3-acetic acid-amido synthetase GH3.5%2C transcript variant X2	23824	402.028	3957	67.1192	-2.43855	-2.38132	0	0
XM_004296370.2	101292295	product=pathogenesis-related protein PR-1-like	40	1.52205	0	0	-5.20647	-2.37585	6.39902e-11	2.69683e-10
XM_011465387.1	105351368	product=protein PLANT CADMIUM RESISTANCE 2-like	218	9.53503	23	1.01119	-3.03875	-2.37571	2.07793e-40	2.26103e-39
XM_004291041.2	101299346	product=uncharacterized acetyltransferase At3g50280-like	379	6.10234	46	0.744483	-2.86419	-2.37565	4.57487e-65	7.78951e-64
XR_904050.1	101295765	product=glutathione reductase%2C chloroplastic%2C transcript variant X1	651	10.5976	3360	54.9798	2.51703	2.37555	0	0
XM_004310177.2	101307273	product=uncharacterized LOC101307273%2C transcript variant X2	310	4.9332	36	0.575849	-2.92024	-2.37502	4.58766e-55	6.60925e-54
XM_004289844.2	101295765	product=glutathione reductase%2C chloroplastic%2C transcript variant X3	650	10.7812	3352	55.8852	2.5158	2.3742	0	0
XM_004298620.2	101292503	product=legumain	1553	31.8121	7707	158.688	2.46145	2.36902	0	0
XR_904051.1	101295765	product=glutathione reductase%2C chloroplastic%2C transcript variant X2	667	10.9013	3420	56.1848	2.50758	2.3677	0	0
XM_004307865.2	101312490	product=ribosome-binding factor PSRP1%2C chloroplastic	3062	96.332	14884	470.678	2.43192	2.36579	0	0
XM_004288686.2	101295949	product=F-box/kelch-repeat protein At3g23880-like	186	3.40016	1037	19.0548	2.62377	2.36459	4.40778e-145	1.54499e-143
XM_004304122.2	101301410	product=late embryogenesis abundant protein 76-like%2C transcript variant X2	8333	426.738	39732	2045.22	2.40434	2.36407	0	0
XM_011466439.1	101314756	product=calcium-transporting ATPase 8%2C plasma membrane-type-like%2C transcript variant X2	3530	34.2248	17008	165.752	2.41923	2.35756	0	0
XM_011472645.1	105353463	product=probable leucine-rich repeat receptor-like serine/threonine-protein kinase At3g14840%2C transcript variant X3	474	5.21395	61	0.674463	-2.78651	-2.35641	8.96664e-79	1.82149e-77
XM_011472644.1	105353463	product=probable leucine-rich repeat receptor-like serine/threonine-protein kinase At3g14840%2C transcript variant X2	474	5.19227	61	0.671658	-2.78651	-2.35641	8.96664e-79	1.82149e-77
XM_004296193.2	101311367	product=GDSL esterase/lipase At4g16230-like	374	9.26126	46	1.14497	-2.84508	-2.3561	7.44818e-64	1.25074e-62
XM_011461121.1	105349960	product=uncharacterized LOC105349960	214	6.48893	23	0.701014	-3.01215	-2.34829	2.0232e-39	2.1535e-38
XM_004307858.2	101310465	product=growth-regulating factor 3	905	14.9771	4514	75.0894	2.46822	2.34758	0	0
XM_011468597.1	101302850	product=two pore calcium channel protein 1%2C transcript variant X2	1096	14.5627	5422	72.415	2.45661	2.34677	0	0
XM_011466441.1	101314756	product=calcium-transporting ATPase 8%2C plasma membrane-type-like%2C transcript variant X4	3501	35.808	16738	172.08	2.40804	2.34607	0	0
XM_004295032.2	101307677	product=major allergen Pru av 1-like	19	0.995116	151	7.94944	3.07708	2.346	3.7688e-27	3.00183e-26
XM_004303047.2	101302850	product=two pore calcium channel protein 1%2C transcript variant X1	1204	14.2378	5927	70.4516	2.44959	2.34469	0	0
XM_011467766.1	101306449	product=uncharacterized LOC101306449	62	1.29668	388	8.15665	2.77742	2.34348	1.91757e-59	3.00485e-58
XM_004295402.2	101312525	product=reticuline oxidase-like protein	370	6.16193	46	0.770038	-2.82961	-2.34026	6.91459e-63	1.14344e-61
XM_004299743.2	101314468	product=probable xyloglucan endotransglucosylase/hydrolase protein 23	110	3.00659	634	17.4184	2.66728	2.33444	2.34213e-91	5.47738e-90
XM_004300606.2	101313807	product=7-deoxyloganetin glucosyltransferase-like%2C transcript variant X1	7819	135.416	1304	22.7004	-2.43204	-2.3328	0	0
XM_011471018.1	101311052	product=protein trichome birefringence-like 36%2C transcript variant X3	413	9.55932	53	1.23308	-2.78752	-2.32832	5.7382e-69	1.0281e-67
XM_011471017.1	101311052	product=protein trichome birefringence-like 36%2C transcript variant X2	413	9.52345	53	1.22846	-2.78752	-2.32832	1.80413e-67	3.17516e-66
XM_004300571.2	101301204	product=splicing factor U2af large subunit A%2C transcript variant X6	148	2.59981	14	0.2472	-3.1612	-2.3263	0.965535	0.985032
XM_004296862.2	101305932	product=uncharacterized LOC101305932	1794	24.2566	278	3.77826	-2.53457	-2.32378	2.08688e-265	1.2874e-263
XM_004287211.2	101303545	product=protein SRG1-like	5120	143.452	845	23.7976	-2.44662	-2.32378	0	0
XM_004299744.2	101314756	product=calcium-transporting ATPase 8%2C plasma membrane-type-like%2C transcript variant X1	3705	35.3362	17418	166.982	2.38381	2.32347	0	0
XM_011466440.1	101314756	product=calcium-transporting ATPase 8%2C plasma membrane-type-like%2C transcript variant X3	3610	33.5451	16975	158.551	2.3841	2.32298	0	0
XM_011464392.1	101298880	product=monothiol glutaredoxin-S2-like	34	1.52696	233	10.5183	2.89216	2.32284	3.34732e-38	3.45862e-37
XM_011468333.1	101296304	product=two-component response regulator-like APRR7	918	11.3091	4488	55.5748	2.43934	2.31933	0	0
XM_004299261.2	101315050	product=chaperone protein ClpB1	3835	45.0758	628	7.41955	-2.45739	-2.31532	0	0
XM_004299600.2	101295419	product=7-deoxyloganetin glucosyltransferase-like	299	4.95489	1551	25.8353	2.52217	2.31511	9.82924e-206	4.84893e-204
XR_184493.2	101295705	ncrna_class=lncRNA	129	3.80516	9	0.266848	-3.54936	-2.31361	7.52605e-28	6.12089e-27
XM_004290602.2	101313664	product=probable inactive patatin-like protein 9	712	16.1455	101	2.30215	-2.65425	-2.31303	8.11822e-112	2.26345e-110
XM_004294117.2	101314830	product=B-box zinc finger protein 22	672	20.8217	3315	103.245	2.45184	2.312	0	0
XM_004306257.2	101306663	product=truncated transcription factor CAULIFLOWER A-like	238	9.80498	1253	51.8872	2.54253	2.31143	2.55741e-168	1.03651e-166
XM_011467218.1	101313807	product=7-deoxyloganetin glucosyltransferase-like%2C transcript variant X2	7203	122.56	1217	20.8144	-2.41321	-2.31042	0	0
XM_004302496.2	101307313	product=vacuolar cation/proton exchanger 3	2293	45.0196	10752	212.19	2.37988	2.30329	0	0
XM_004288440.2	101314507	product=NAC domain-containing protein 2-like	535	15.0353	2652	74.9155	2.4584	2.30203	0	0
XM_004307367.2	101306463	product=LOB domain-containing protein 1-like	2	0.0649721	43	1.40412	4.02555	2.302	3.2807e-11	1.40794e-10
XM_004294270.2	101314354	product=uncharacterized LOC101314354	47	2.1771	299	13.9216	2.79493	2.30161	1.20931e-46	1.5105e-45
XM_011464591.1	101293872	product=probable boron transporter 2%2C transcript variant X1	736	9.57233	106	1.38575	-2.63298	-2.29916	1.88622e-112	5.29425e-111
XM_011464750.1	105351146	product=uncharacterized LOC105351146%2C transcript variant X2	223	3.86572	1169	20.3694	2.53602	2.29739	1.04302e-156	3.9084e-155
XM_004296533.2	101298787	product=early light-induced protein 1%2C chloroplastic-like	451	19.7028	2249	98.7596	2.46661	2.29667	4.26221e-289	2.82569e-287
XM_011464593.1	101293872	product=probable boron transporter 2%2C transcript variant X3	722	9.73714	104	1.40983	-2.63253	-2.29566	2.51806e-110	6.90241e-109
XM_004306110.2	101304214	product=probable inactive leucine-rich repeat receptor-like protein kinase At1g66830	428	5.85786	57	0.784169	-2.73577	-2.29073	3.72644e-70	6.77813e-69
XM_004306673.2	101304804	product=delta(8)-fatty-acid desaturase 1-like%2C transcript variant X1	1685	33.313	7901	157.013	2.37969	2.29047	0	0
XM_011469041.1	105352309	product=protein GAST1	266	9.54073	32	1.15369	-2.86522	-2.28853	2.21071e-46	2.74726e-45
XM_011461028.1	105349931	product=uncharacterized LOC105349931	6	0.159733	80	2.14078	3.68357	2.28814	7.02917e-18	4.13523e-17
XM_004293522.2	101303095	product=uncharacterized LOC101303095	174	3.13112	926	16.7495	2.55629	2.28752	7.73438e-126	2.3882e-124
XM_004302610.2	101291444	product=BAHD acyltransferase DCR	2865	47.3286	474	7.87075	-2.44196	-2.27873	0	0
XM_011471572.1	101314220	product=18.1 kDa class I heat shock protein-like	4403	196.307	747	33.4771	-2.40663	-2.27583	0	0
XR_904856.1	105349362	ncrna_class=lncRNA	232	10.4447	1192	53.9417	2.50727	2.27277	1.56173e-157	5.88217e-156
XM_004297410.2	101301187	product=protein PLANT CADMIUM RESISTANCE 2-like	169	6.41082	18	0.686339	-3.01039	-2.27061	1.34557e-31	1.21507e-30
XM_004306656.2	101299990	product=probable inactive 2-oxoglutarate-dependent dioxygenase AOP2	24	0.705116	171	5.04992	2.93349	2.26891	4.89206e-29	4.10398e-28
XM_011462033.1	101311458	product=G-type lectin S-receptor-like serine/threonine-protein kinase At1g61500	231	2.94311	1182	15.1374	2.50133	2.26625	8.90435e-156	3.32811e-154
XM_011466296.1	101293497	product=probable LRR receptor-like serine/threonine-protein kinase At4g08850%2C transcript variant X2	2	0.023016	42	0.485835	3.99238	2.26614	5.98517e-11	2.52587e-10
XM_011466295.1	101293497	product=probable LRR receptor-like serine/threonine-protein kinase At4g08850%2C transcript variant X1	2	0.0221585	42	0.467733	3.99238	2.26614	5.98517e-11	2.52587e-10
XM_004301579.2	101306729	product=glucan endo-1%2C3-beta-glucosidase 12-like	86	1.61701	5	0.0944984	-3.7069	-2.26591	7.47531e-20	4.77856e-19
XM_004305632.2	101310247	product=glucose-6-phosphate 1-dehydrogenase%2C chloroplastic-like	383	6.27917	51	0.840452	-2.73344	-2.2647	5.6127e-63	9.30255e-62
XM_004289884.2	101308237	product=ethylene-responsive transcription factor 1B	142	3.0476	14	0.302021	-3.1019	-2.26453	1.43256e-27	1.15357e-26
XM_011462074.1	101303883	product=shikimate O-hydroxycinnamoyltransferase-like%2C transcript variant X2	1294	28.6731	204	4.54369	-2.50818	-2.26289	4.02774e-190	1.8427e-188
XM_004293601.2	101303883	product=shikimate O-hydroxycinnamoyltransferase-like%2C transcript variant X1	1294	28.4169	204	4.5031	-2.50818	-2.26289	4.02774e-190	1.8427e-188
XM_004290620.2	101294322	product=basic 7S globulin 2-like	36	0.72813	234	4.75731	2.81814	2.26108	2.58373e-37	2.61976e-36
XM_004301064.2	101298717	product=replication protein A 70 kDa DNA-binding subunit B	37	0.622378	1	0.016908	-4.09685	-2.25829	3.48216e-10	1.4049e-09
XM_004308897.2	101301733	product=RING-H2 finger protein ATL66	38	1.39277	243	8.95242	2.79641	2.25228	2.41722e-38	2.50821e-37
XM_004288192.2	101309386	product=glucan endo-1%2C3-beta-glucosidase 13	390	8.50382	53	1.16162	-2.70506	-2.24395	1.84566e-63	3.07641e-62
XM_004307642.2	101291378	product=dehydration-responsive element-binding protein 2A-like%2C transcript variant X2	157	3.51692	818	18.4186	2.52502	2.24201	4.06275e-109	1.1013e-107
XM_004306674.2	101304804	product=delta(8)-fatty-acid desaturase 1-like%2C transcript variant X2	1659	32.2287	7524	146.921	2.33159	2.2414	0	0
XM_011464592.1	101293872	product=probable boron transporter 2%2C transcript variant X2	725	10.1488	109	1.53371	-2.57139	-2.24093	1.32938e-114	3.81537e-113
XM_011464097.1	101304178	product=MATE efflux family protein LAL5-like%2C transcript variant X1	81	1.46116	455	8.25017	2.62642	2.2404	4.84127e-65	8.22876e-64
XM_011471646.1	101291378	product=dehydration-responsive element-binding protein 2A-like%2C transcript variant X1	157	3.52764	815	18.4069	2.51972	2.23662	8.62612e-110	2.35574e-108
XM_004303079.2	101312070	product=trans-resveratrol di-O-methyltransferase-like	126	3.41104	11	0.299328	-3.25264	-2.23503	1.22843e-25	9.39373e-25
XM_004300306.2	101293789	product=ethylene-responsive transcription factor 2	1246	35.0703	200	5.65836	-2.48212	-2.23413	3.23962e-181	1.40638e-179
XM_011464098.1	101304178	product=MATE efflux family protein LAL5-like%2C transcript variant X3	79	1.49531	443	8.42843	2.62357	2.23288	2.63629e-63	4.38678e-62
XM_004296475.2	101304178	product=MATE efflux family protein LAL5-like%2C transcript variant X2	82	1.50722	456	8.42493	2.61209	2.22797	9.16119e-65	1.55084e-63
XM_004298106.2	101301387	product=thermospermine synthase ACAULIS5-like	197	4.56551	23	0.535784	-2.89332	-2.22562	3.04813e-35	2.98228e-34
XM_004296757.2	101298306	product=monothiol glutaredoxin-S2-like	4	0.416629	60	6.28174	3.75989	2.22419	3.68506e-14	1.84966e-13
XM_004308056.2	101298658	product=uncharacterized LOC101298658	240	8.33258	1189	41.4944	2.45493	2.2235	4.31151e-153	1.57531e-151
XM_004304224.2	101307320	product=CSC1-like protein HYP1	721	10.3522	3315	47.8432	2.35045	2.2145	0	0
XM_011467765.1	101307034	product=uncharacterized LOC101307034	102	2.05627	546	11.064	2.55997	2.21262	2.79406e-75	5.43655e-74
XM_011469580.1	101293613	product=ninja-family protein AFP3-like%2C transcript variant X2	121	2.64149	634	13.9121	2.53095	2.21029	7.3684e-86	1.62039e-84
XM_004304178.2	101293613	product=ninja-family protein AFP3-like%2C transcript variant X1	121	2.6368	634	13.8874	2.53095	2.21029	7.3684e-86	1.62039e-84
XM_004293315.2	101314919	product=fruit protein pKIWI501-like	227	8.82898	28	1.09467	-2.82383	-2.21007	2.09065e-39	2.22449e-38
XM_004295178.2	101306996	product=linoleate 13S-lipoxygenase 2-1%2C chloroplastic-like	8874	101.206	1623	18.6057	-2.29912	-2.20942	0	0
XM_004304263.2	101296022	product=tubulin alpha-2 chain-like	4951	110.37	887	19.8756	-2.3283	-2.2076	0	0
XM_004300194.2	101309055	product=uncharacterized LOC101309055	126	3.65814	656	19.144	2.52214	2.20747	2.19606e-88	4.96921e-87
XM_004307928.2	101309974	product=probable plastid-lipid-associated protein 14%2C chloroplastic%2C transcript variant X1	236	3.06722	1158	15.128	2.441	2.20745	6.94886e-148	2.45624e-146
XM_011471925.1	101309974	product=probable plastid-lipid-associated protein 14%2C chloroplastic%2C transcript variant X2	236	3.07916	1157	15.1738	2.43975	2.20619	4.18291e-148	1.48392e-146
XM_004290679.2	101313665	product=aquaporin PIP2-7	4325	136.067	771	24.3814	-2.33528	-2.206	0	0
XM_011460435.1	101311224	product=probable polyol transporter 6%2C transcript variant X2	257	3.74991	33	0.483995	-2.77269	-2.20131	1.38547e-43	1.61779e-42
XM_011460432.1	101311224	product=probable polyol transporter 6%2C transcript variant X1	257	3.31793	33	0.428241	-2.77269	-2.20131	1.38547e-43	1.61779e-42
XM_004306305.2	101296705	product=isocitrate dehydrogenase [NADP]	237	4.86558	1157	23.8759	2.43368	2.2005	2.01234e-147	7.10453e-146
XM_004296894.2	101291229	product=transcription factor MUTE	187	6.7334	22	0.79626	-2.87995	-2.19854	1.96425e-33	1.84956e-32
XM_004304291.2	101307230	product=protein MIZU-KUSSEI 1	49	1.52337	2	0.0624996	-3.90782	-2.19812	1.35288e-12	6.28565e-12
XM_004287592.2	101297371	product=serine/threonine-protein kinase At5g01020-like	484	9.42731	71	1.39008	-2.60084	-2.19652	2.77883e-75	5.4105e-74
XM_011462281.1	101306603	product=MLO-like protein 12%2C transcript variant X3	2	0.0461473	40	0.927717	3.92367	2.19167	9.05327e-13	4.23613e-12
XM_004300506.2	101306434	product=probable esterase PIR7A%2C transcript variant X1	368	10.4778	1727	49.4259	2.37849	2.18968	1.44469e-212	7.32417e-211
XM_004308510.2	101311052	product=protein trichome birefringence-like 36%2C transcript variant X1	429	10.1658	62	1.47677	-2.61983	-2.18937	5.51239e-47	6.94452e-46
XM_004308922.2	101309596	product=WEB family protein At2g40480	464	8.49055	68	1.25074	-2.60148	-2.18888	2.754e-72	5.13036e-71
XM_004307173.2	101292742	product=uncharacterized LOC101292742	5530	129.296	1010	23.7368	-2.30068	-2.18729	0	0
XM_004300507.2	101306434	product=probable esterase PIR7A%2C transcript variant X2	389	11.0757	1815	51.9444	2.3703	2.18645	2.75654e-222	1.474e-220
XM_004302066.2	101299202	product=GDSL esterase/lipase At5g33370-like	272	7.27801	36	0.968245	-2.73223	-2.18189	2.23527e-45	2.72011e-44
XM_004302246.2	101305769	product=galactinol synthase 2-like	67	1.48462	371	8.26329	2.60277	2.17989	6.90577e-53	9.57689e-52
XR_905916.1	105351456	product=subtilisin-like protease%2C transcript variant X3	100	1.71736	7	0.120837	-3.50713	-2.17654	6.15522e-22	4.22107e-21
XR_905915.1	105351456	product=subtilisin-like protease%2C transcript variant X2	100	1.79337	7	0.126185	-3.50713	-2.17654	6.15522e-22	4.22107e-21
XR_905914.1	105351456	product=subtilisin-like protease%2C transcript variant X1	100	1.65715	7	0.1166	-3.50713	-2.17654	6.15522e-22	4.22107e-21
XM_004302350.2	101311773	product=luminal-binding protein 4	35	0.564034	1	0.0161985	-4.01885	-2.17426	1.10485e-09	4.29496e-09
XM_004290658.2	101305127	product=histone H2AX-like	35	2.02592	0	0	-5.01885	-2.17426	8.98567e-10	3.51592e-09
XM_004303194.2	101301598	product=probable WRKY transcription factor 40	480	11.9746	2187	54.8411	2.33658	2.17036	1.98747e-262	1.20328e-260
XM_004294611.2	101296188	product=ribulose bisphosphate carboxylase/oxygenase activase%2C chloroplastic-like	18974	409.125	78353	1698.21	2.19699	2.1699	0	0
XM_004291427.2	101291692	product=uncharacterized RNA-binding protein C17H9.04c	48	1.81708	2	0.0761032	-3.87867	-2.16691	2.43995e-12	1.11524e-11
XM_004306016.2	101295361	product=phenolic glucoside malonyltransferase 1-like	90	1.4948	6	0.100168	-3.54936	-2.16464	3.98441e-20	2.57e-19
XM_004303985.2	101308891	product=cyclin-D3-1	1542	39.5934	266	6.8653	-2.37975	-2.16259	4.85912e-214	2.49801e-212
XR_905917.1	105351456	product=subtilisin-like protease%2C transcript variant X4	99	1.67676	7	0.119171	-3.49278	-2.16134	1.10811e-21	7.52516e-21
XM_011465734.1	105351456	product=subtilisin-like protease%2C transcript variant X5	99	1.72836	7	0.122839	-3.49278	-2.16134	1.10811e-21	7.52516e-21
XM_004291805.2	101291989	product=jasmonate O-methyltransferase-like	99	2.54022	7	0.18054	-3.49278	-2.16134	1.10811e-21	7.52516e-21
XM_011470764.1	101293817	product=cyclic nucleotide-gated ion channel 1-like%2C transcript variant X2	250	3.65356	33	0.484762	-2.733	-2.16044	5.80313e-42	6.51529e-41
XM_004297626.2	101296371	product=myosin heavy chain kinase B	166	3.48559	812	17.1381	2.43449	2.15738	3.31489e-104	8.61902e-103
XM_004307950.2	101291765	product=starch synthase 1%2C chloroplastic/amyloplastic	625	9.32988	2778	41.6838	2.30141	2.15507	0	0
XM_011462323.1	105350388	product=uncharacterized LOC105350388%2C transcript variant X2	199	9.52917	25	1.20332	-2.79234	-2.14558	7.25062e-34	6.89373e-33
XM_011467085.1	101312840	product=UPF0481 protein At3g47200-like%2C transcript variant X1	155	3.54535	18	0.413847	-2.8864	-2.14198	3.78447e-28	3.10373e-27
XM_004303450.2	101310238	product=protein YLS9-like	27	0.456668	172	2.92418	2.77835	2.14195	1.41425e-27	1.13945e-26
XM_004304362.2	101304986	product=peroxidase 21	0	0	28	0.820351	5.00906	2.13678	3.33476e-08	1.16909e-07
XM_004287242.2	101312956	product=umecyanin-like	0	0	28	0.959985	5.00906	2.13678	3.33476e-08	1.16909e-07
XM_004301776.2	101312840	product=UPF0481 protein At3g47200-like%2C transcript variant X2	154	3.53564	18	0.415393	-2.87712	-2.13234	6.65372e-28	5.42197e-27
XM_011472586.1	101302320	product=uncharacterized protein At5g39865	34	0.426117	0	0	-4.9782	-2.13034	1.53542e-09	5.90956e-09
XM_004309580.1	101309414	product=uncharacterized LOC101309414	34	0.70827	1	0.0209391	-3.9782	-2.13034	1.97341e-09	7.53837e-09
XM_004300938.2	101297737	product=putative proline-rich receptor-like protein kinase PERK6	34	0.47794	0	0	-4.9782	-2.13034	1.53542e-09	5.90956e-09
XM_011467308.1	101309738	product=flavonoid 3'-monooxygenase-like	6	0.233365	72	2.81486	3.53355	2.12744	8.22346e-16	4.47321e-15
XM_004296336.2	101305743	product=probable plastid-lipid-associated protein 6%2C chloroplastic	2380	66.9371	9856	278.631	2.20066	2.12458	0	0
XR_185208.2	101309385	ncrna_class=lncRNA	153	0.677235	18	0.0800866	-2.86778	-2.12263	1.16932e-27	9.43928e-27
XM_004306062.2	101310443	product=UDP-glycosyltransferase 72B1-like	1327	31.5873	233	5.57489	-2.3536	-2.12166	2.1536e-182	9.44715e-181
XM_011470681.1	101306093	product=probable disease resistance RPP8-like protein 2	5	0.0643934	64	0.828497	3.58848	2.11904	1.83165e-14	9.36371e-14
XM_004290109.2	101303288	product=uncharacterized LOC101303288	76	1.46791	396	7.68814	2.51729	2.11662	4.06985e-54	5.7336e-53
XM_004290556.2	101298849	product=uncharacterized LOC101298849	85	4.10759	436	21.1784	2.4963	2.11584	9.17152e-59	1.41673e-57
XM_004309738.2	101297900	product=NAC domain-containing protein 77-like	90	1.57049	456	7.9983	2.47933	2.10866	7.49562e-61	1.20221e-59
XM_011463671.1	105350762	product=uncharacterized LOC105350762	281	11.9918	40	1.71585	-2.63092	-2.10364	3.63001e-45	4.3882e-44
XM_004290456.2	101315298	product=oleosin-B4-like	5969	213.47	1161	41.7355	-2.21004	-2.10364	0	0
XM_011461808.1	105350215	product=uncharacterized LOC105350215	151	4.83301	18	0.579098	-2.84892	-2.10301	3.60648e-27	2.87488e-26
XM_011462322.1	105350388	product=uncharacterized LOC105350388%2C transcript variant X1	199	9.34709	26	1.22754	-2.73789	-2.10051	1.77822e-34	1.71292e-33
XM_004305782.2	101314114	product=transcription factor PAR1	662	24.9326	110	4.1643	-2.42737	-2.09574	3.22086e-95	7.86508e-94
XM_004308641.2	101311426	product=RNA polymerase sigma factor sigD%2C chloroplastic	126	3.05848	608	14.8347	2.41269	2.09573	1.01001e-77	2.02993e-76
XM_011466885.1	101297350	product=haloacid dehalogenase-like hydrolase domain-containing protein Sgpp%2C transcript variant X1	81	2.81755	412	14.4053	2.48352	2.09391	2.63792e-55	3.82479e-54
XM_011464979.1	101292012	product=putative calcium-binding protein CML19	29	0.619872	176	3.78143	2.71179	2.09297	1.95822e-27	1.57253e-26
XM_004296617.2	101300713	product=protein tesmin/TSO1-like CXC 2	5612	68.1567	1099	13.4162	-2.20019	-2.0908	0	0
XM_004299579.2	101312730	product=1-aminocyclopropane-1-carboxylate oxidase homolog%2C transcript variant X1	381	9.31572	1666	40.9455	2.27669	2.08977	1.48971e-167	5.98805e-166
XM_004310009.2	101302615	product=geraniol 8-hydroxylase-like	27	0.569854	166	3.52166	2.72743	2.08894	3.69855e-26	2.86716e-25
XM_004306104.2	101301036	product=phenolic glucoside malonyltransferase 1-like	278	5.82405	40	0.842325	-2.61549	-2.08776	1.85953e-44	2.21684e-43
XM_004297349.2	101308566	product=purple acid phosphatase 7-like	1106	28.7184	196	5.11564	-2.33931	-2.08688	1.92666e-151	6.98726e-150
XM_004300237.2	101297350	product=haloacid dehalogenase-like hydrolase domain-containing protein Sgpp%2C transcript variant X2	81	2.90809	410	14.796	2.47652	2.08672	7.37418e-55	1.05356e-53
XM_004288493.2	101307049	product=stachyose synthase	124	1.16873	595	5.63703	2.40446	2.08487	8.77425e-76	1.71981e-74
XM_011467931.1	101294863	product=putative FBD-associated F-box protein At5g53635%2C transcript variant X1	249	4.15244	35	0.586694	-2.64478	-2.08468	1.76334e-40	1.9248e-39
XM_004302294.2	101294863	product=putative FBD-associated F-box protein At5g53635%2C transcript variant X2	249	4.1751	35	0.589895	-2.64478	-2.08468	1.76334e-40	1.9248e-39
XM_004289806.2	101308526	product=auxin transporter-like protein 2	173	3.20543	22	0.409734	-2.7683	-2.08287	4.98855e-30	4.29308e-29
XM_004298762.2	101309153	product=cytochrome P450 86A7	2387	34.7739	451	6.60414	-2.25033	-2.08127	0	0
XM_004293793.2	101312997	product=organic cation/carnitine transporter 3	26	0.45913	160	2.84002	2.72711	2.07766	2.76316e-25	2.09114e-24
XM_004291180.2	101292277	product=BTB/POZ domain-containing protein At2g30600%2C transcript variant X1	916	12.0023	3792	49.9432	2.19942	2.07736	0	0
XM_011469907.1	105352537	product=uncharacterized LOC105352537	386	10.8562	60	1.69621	-2.51437	-2.0747	1.58154e-58	2.42893e-57
XM_004290789.2	101295969	product=flavonol synthase/flavanone 3-hydroxylase	435	11.3512	1865	48.918	2.24863	2.07313	4.12982e-213	2.11197e-211
XM_004296651.2	101311750	product=putative lipid-transfer protein DIR1	2323	141.341	442	27.0322	-2.24015	-2.06931	8.59211e-301	5.95212e-299
XR_904501.1	105349911	product=pleiotropic drug resistance protein 2-like	2656	20.6301	10556	82.4161	2.14141	2.06906	0	0
XM_011460690.1	101302042	product=carotenoid 9%2C10(9'%2C10')-cleavage dioxygenase 1-like%2C transcript variant X1	22	0.394733	140	2.52492	2.76707	2.06905	9.78848e-23	6.87929e-22
XM_004292800.2	101302042	product=carotenoid 9%2C10(9'%2C10')-cleavage dioxygenase 1-like%2C transcript variant X2	22	0.395696	140	2.53108	2.76707	2.06905	9.78848e-23	6.87929e-22
XM_011460771.1	101292277	product=BTB/POZ domain-containing protein At2g30600%2C transcript variant X2	904	11.9727	3722	49.5495	2.19155	2.06862	0	0
XM_011464749.1	105351146	product=uncharacterized LOC105351146%2C transcript variant X1	216	3.4733	971	15.6945	2.31434	2.06843	2.1638e-116	6.28403e-115
XM_004300236.2	101297058	product=haloacid dehalogenase-like hydrolase domain-containing protein Sgpp	159	5.42833	734	25.1886	2.35075	2.0662	2.47411e-90	5.72208e-89
XR_905953.1	101309254	ncrna_class=lncRNA	279	15.7779	1224	69.577	2.28036	2.06275	2.61375e-143	9.03192e-142
XM_004306755.2	101307046	product=remorin-like	1011	42.0262	4125	172.358	2.17861	2.06218	0	0
XM_004296652.2	101312045	product=putative lipid-transfer protein DIR1	451	52.7909	73	8.58904	-2.45965	-2.05744	1.67869e-66	2.89868e-65
XM_004296855.2	101303895	product=sugar transport protein 13	1047	19.1777	4249	78.2303	2.1709	2.0564	0	0
XM_004303700.2	101291939	product=uncharacterized LOC101291939	436	17.9822	1847	76.5705	2.23134	2.05582	6.55597e-209	3.29519e-207
XM_011468589.1	101313236	product=ethylene-responsive transcription factor ERF054-like	16	0.18546	110	1.28163	2.85803	2.05576	6.28917e-19	3.86517e-18
XM_011459798.1	101304050	product=monosaccharide-sensing protein 2%2C transcript variant X1	1474	18.1042	5899	72.8282	2.15108	2.05426	0	0
XM_004290026.2	101304050	product=monosaccharide-sensing protein 2%2C transcript variant X2	1470	18.2189	5873	73.1653	2.14862	2.05166	0	0
XM_004288447.2	101293136	product=probable mannitol dehydrogenase	4253	105.457	849	21.1606	-2.17221	-2.04775	0	0
XM_004306791.2	101293817	product=cyclic nucleotide-gated ion channel 1-like%2C transcript variant X1	265	3.51728	39	0.520313	-2.58228	-2.04737	6.68018e-42	7.49423e-41
XM_004302718.2	101301793	product=probable WRKY transcription factor 49	630	12.0358	108	2.07395	-2.38223	-2.0468	5.64461e-89	1.28719e-87
XM_004299243.2	101309836	product=protein SPIRAL1-like 2	1076	60.112	4333	243.319	2.15976	2.0467	0	0
XM_011466886.1	101297350	product=haloacid dehalogenase-like hydrolase domain-containing protein Sgpp%2C transcript variant X3	79	3.15245	390	15.6432	2.44018	2.04473	2.36253e-51	3.19618e-50
XM_004297607.2	101315140	product=MLP-like protein 423	5998	310.177	1219	63.3645	-2.14676	-2.0425	0	0
XM_004303384.2	101312170	product=uncharacterized LOC101312170	1122	41.9574	206	7.74324	-2.28858	-2.04141	5.11806e-150	1.83567e-148
XM_004304060.2	101308399	product=cytochrome P450 71D9-like	302	3.35298	46	0.513359	-2.53751	-2.04054	1.05674e-46	1.32162e-45
XM_004303310.2	101313230	product=glycine%2C alanine and asparagine-rich protein-like	1262	71.4778	5024	286.023	2.14335	2.03874	0	0
XM_004297663.2	101307110	product=high mobility group B protein 7-like	32	1.32424	1	0.0415963	-3.89332	-2.03831	6.33101e-09	2.3362e-08
XM_004289541.2	101309592	product=cysteine-rich repeat secretory protein 60	816	30.4527	146	5.47681	-2.32344	-2.03216	1.49603e-111	4.15921e-110
XM_011462629.1	101314161	product=probable anion transporter 1%2C chloroplastic	978	22.2596	3913	89.5214	2.15034	2.03174	0	0
XM_011471918.1	105353151	product=spermine synthase-like	327	15.2621	51	2.39263	-2.50603	-2.03146	9.20126e-50	1.20799e-48
XM_011466268.1	101312730	product=1-aminocyclopropane-1-carboxylate oxidase homolog%2C transcript variant X2	351	10.6606	1482	45.2441	2.22595	2.03067	8.62782e-194	4.03867e-192
XM_004289990.2	101292947	product=lysine histidine transporter-like 8	301	5.87527	1284	25.1921	2.24023	2.02993	9.96762e-147	3.50638e-145
XM_011471863.1	105353127	product=uncharacterized LOC105353127	46	0.9017	244	4.80765	2.53313	2.02644	2.03202e-34	1.95292e-33
XM_011472683.1	101298852	product=(3S%2C6E)-nerolidol synthase 1%2C chloroplastic	293	10.4381	45	1.6114	-2.52503	-2.02263	3.70824e-45	4.48092e-44
XM_004295225.2	101298208	product=polyphenol oxidase I%2C chloroplastic-like	52	1.05232	269	5.47187	2.49997	2.02035	3.82342e-37	3.86071e-36
XM_004291515.2	101294725	product=two-pore potassium channel 1-like	385	9.95484	1604	41.6886	2.20698	2.02009	4.44354e-179	1.91203e-177
XM_004307684.2	101304710	product=expansin-A10	1529	55.0018	293	10.5944	-2.22857	-2.01955	1.04569e-197	4.99055e-196
XM_004300412.2	101301587	product=uncharacterized LOC101301587	91	4.31275	433	20.6272	2.38907	2.01804	2.64583e-55	3.83436e-54
XM_011460471.1	101296827		NA	2245	NA	2245	-2.80585	-2.0159	NA	NA
XM_004287023.2	101295554	product=(-)-alpha-pinene synthase-like	107	1.98754	10	0.186712	-3.14438	-2.01517	1.49227e-21	1.00872e-20
XM_004308798.2	101290822	product=L-type lectin-domain containing receptor kinase S.4	2219	29.315	438	5.8163	-2.18719	-2.01503	6.73351e-280	4.34608e-278
XM_011464658.1	105351125	product=uncharacterized LOC105351125	54	1.14495	3	0.0639372	-3.63028	-2.01316	3.86582e-13	1.84766e-12
XM_004290854.2	101292178	product=cyclin-A1-1	165	3.14898	22	0.422034	-2.7004	-2.01236	4.23194e-28	3.46393e-27
XM_004287299.2	101304028	product=uncharacterized LOC101304028	14	0.37379	98	2.63005	2.87354	2.00895	3.5187e-17	2.02571e-16
XM_004300363.2	101310519	product=cinnamoyl-CoA reductase 2-like	4880	109.117	1008	22.6554	-2.12317	-2.00848	0	0
XM_004308910.2	101305807	product=abscisic acid receptor PYL4	17	0.660504	111	4.335	2.78851	2.00578	1.33692e-18	8.08914e-18
XM_011472068.1	101294513	product=low-temperature-induced 65 kDa protein%2C transcript variant X5	4390	67.1646	16509	253.884	2.0618	2.0051	0	0
XM_011472067.1	101294513	product=low-temperature-induced 65 kDa protein%2C transcript variant X4	4395	67.1575	16524	253.799	2.06147	2.0048	0	0
XM_011465811.1	105351472	product=uncharacterized LOC105351472	114	4.12905	523	19.0408	2.33901	2.00472	1.36511e-64	2.30559e-63
XM_004295386.2	101306708	product=tetrahydrocannabinolic acid synthase-like	423	6.56151	71	1.10703	-2.40692	-1.99814	3.83453e-61	6.19081e-60
XM_004295508.2	101303313	product=protein E6	9795	286.179	2089	61.3495	-2.07761	-1.99741	0	0
	101306638		18	1.02738	115	6.59777	2.76113	1.99736	5.34389e-19	3.28836e-18
XM_004309956.2	101310083	product=probable pectate lyase 5	835	20.8873	154	3.87218	-2.28016	-1.99552	8.2474e-112	2.29728e-110
XM_011469663.1	101297574	product=aquaporin NIP2-1-like%2C transcript variant X2	31	0.584069	0	0	-4.84892	-1.99002	7.78277e-09	2.85448e-08
XM_011469662.1	101297574	product=aquaporin NIP2-1-like%2C transcript variant X1	31	0.572943	0	0	-4.84892	-1.99002	7.78277e-09	2.85448e-08
XM_004306095.2	101297574	product=aquaporin NIP2-1-like%2C transcript variant X3	31	0.573806	0	0	-4.84892	-1.99002	7.78277e-09	2.85448e-08
XM_004298091.2	101295619	product=uncharacterized LOC101295619	31	1.07427	0	0	-4.84892	-1.99002	7.78277e-09	2.85448e-08
XM_004296471.2	101303027	product=GDSL esterase/lipase At5g55050-like	12	0.310063	90	2.3375	2.95843	1.98827	2.06652e-16	1.15652e-15
XM_004301805.2	101299971	product=probable esterase PIR7A	71	2.16354	342	10.4755	2.40322	1.98616	1.87051e-44	2.22902e-43
XM_004293015.2	101302043	product=uncharacterized LOC101302043	6546	119.25	1394	25.5261	-2.07949	-1.98151	0	0
XM_004303705.2	101293323	product=uncharacterized LOC101293323	200	8.75812	29	1.27649	-2.59308	-1.98125	2.44554e-32	2.25281e-31
XM_004300284.2	101311867	product=expansin-like B1	1560	49.9738	308	9.91762	-2.18571	-1.98119	2.29809e-197	1.08966e-195
XM_011462023.1	105350315	product=B-box zinc finger protein 21-like	139	4.95664	18	0.645185	-2.73028	-1.97942	2.9783e-24	2.19335e-23
XM_011471019.1	101311052	product=protein trichome birefringence-like 36%2C transcript variant X4	315	8.92742	51	1.45286	-2.45226	-1.97617	5.7382e-69	1.0281e-67
XM_004287507.2	101296423	product=probable glucuronoxylan glucuronosyltransferase IRX7	268	4.48756	42	0.70691	-2.49412	-1.97449	5.43976e-41	5.99253e-40
XM_011469206.1	101304688	product=organic cation/carnitine transporter 7	218	3.83494	917	16.2147	2.21864	1.97214	4.26103e-104	1.10594e-102
XM_004309308.1	101301630	product=uncharacterized LOC101301630	62	1.45701	4	0.0944864	-3.50427	-1.97204	1.91629e-14	9.78704e-14
XM_004308264.2	101296526	product=cytochrome b561 and DOMON domain-containing protein At3g61750	62	1.29741	4	0.0841368	-3.50427	-1.97204	1.91629e-14	9.78704e-14
XM_004288326.2	101300097	product=cell wall / vacuolar inhibitor of fructosidase 2	1022	40.7823	196	7.8617	-2.22546	-1.97129	9.47886e-133	3.0523e-131
XM_011460944.1	101305333	product=shikimate O-hydroxycinnamoyltransferase-like%2C transcript variant X2	220	4.25145	33	0.641014	-2.54936	-1.97087	8.88566e-35	8.61175e-34
XM_004291470.2	101305333	product=shikimate O-hydroxycinnamoyltransferase-like%2C transcript variant X1	220	4.22268	33	0.636676	-2.54936	-1.97087	8.88566e-35	8.61175e-34
XM_004305904.2	101306076	product=probable LRR receptor-like serine/threonine-protein kinase At4g37250	816	10.3039	153	1.94196	-2.25633	-1.97038	4.41664e-108	1.18844e-106
XM_011462628.1	105350499	product=sodium-dependent phosphate transport protein 1%2C chloroplastic-like	72	5.44008	342	25.974	2.38332	1.96842	5.34573e-44	6.29606e-43
XM_004303007.2	101314480	product=GDSL esterase/lipase At5g03810-like	752	18.8238	140	3.52255	-2.26588	-1.96761	3.02201e-100	7.64054e-99
XM_004308016.2	101311519	product=BAHD acyltransferase DCR	4749	101.333	1010	21.6626	-2.08107	-1.96618	0	0
XM_004297594.2	101311183	product=aldehyde dehydrogenase family 2 member B7%2C mitochondrial-like	390	7.10472	1563	28.6207	2.15108	1.96461	1.40138e-168	5.71135e-167
XM_004304391.2	101314681	product=29 kDa ribonucleoprotein A%2C chloroplastic	5433	153.387	19785	561.468	2.01547	1.9643	0	0
XM_004303483.2	101296498	product=NAC domain-containing protein 90-like	0	0	25	0.467722	4.85152	1.96277	1.80938e-07	6.00863e-07
XM_011459110.1	101302228	product=uncharacterized LOC101302228%2C transcript variant X1	397	7.95114	1585	31.9086	2.14563	1.9607	6.58076e-161	2.52073e-159
XM_004297121.2	101314743	product=uncharacterized LOC101314743	14	0.338939	94	2.28749	2.81404	1.94574	3.26567e-16	1.81307e-15
XM_004290703.2	101295772	product=uncharacterized LOC101295772%2C transcript variant X1	386	7.40889	1524	29.4029	2.12948	1.94176	3.62007e-162	1.40316e-160
XM_011469002.1	101308692	product=uncharacterized LOC101308692%2C transcript variant X2	30	0.769764	0	0	-4.80312	-1.94004	1.34431e-08	4.84708e-08
XM_011461836.1	105350223	product=G-type lectin S-receptor-like serine/threonine-protein kinase B120	30	1.51944	1	0.0509097	-3.80312	-1.94004	2.04664e-08	7.2915e-08
XM_004309112.2	101298846	product=transcription factor SPEECHLESS	30	0.626005	0	0	-4.80312	-1.94004	1.34431e-08	4.84708e-08
XM_004303519.2	101308692	product=uncharacterized LOC101308692%2C transcript variant X1	30	0.680708	0	0	-4.80312	-1.94004	1.34431e-08	4.84708e-08
XM_011469351.1	101306160	product=7-deoxyloganetin glucosyltransferase-like%2C transcript variant X3	119	2.39898	15	0.303955	-2.75581	-1.93638	3.02528e-21	2.02097e-20
XM_004287097.2	101294000	product=heat shock 70 kDa protein	119	1.83051	15	0.231929	-2.75581	-1.93638	3.02528e-21	2.02097e-20
XM_011465185.1	101297183	product=cellulose synthase-like protein H1%2C transcript variant X4	106	1.43533	12	0.16333	-2.88995	-1.93487	2.75694e-20	1.7887e-19
XM_011465619.1	101291334	product=monodehydroascorbate reductase%2C chloroplastic%2C transcript variant X1	1383	24.3406	5099	90.2055	2.03273	1.93193	0	0
XM_004298782.2	101291334	product=monodehydroascorbate reductase%2C chloroplastic%2C transcript variant X2	1383	24.4222	5099	90.5079	2.03273	1.93193	0	0
XM_011465742.1	101314659	product=alpha-glucan water dikinase 1%2C chloroplastic%2C transcript variant X4	2683	22.1511	9698	80.4814	2.00453	1.9318	0	0
XM_011465741.1	101314659	product=alpha-glucan water dikinase 1%2C chloroplastic%2C transcript variant X3	2683	22.2307	9698	80.7708	2.00453	1.9318	0	0
XM_004298939.2	101314659	product=alpha-glucan water dikinase 1%2C chloroplastic%2C transcript variant X2	2683	22.2157	9698	80.7164	2.00453	1.9318	0	0
XM_004290042.2	101308723	product=3-hydroxy-3-methylglutaryl-coenzyme A reductase 1-like	356	6.39373	1402	25.3099	2.1256	1.93022	5.37277e-149	1.91298e-147
XM_011465740.1	101314659	product=alpha-glucan water dikinase 1%2C chloroplastic%2C transcript variant X1	2683	22.3361	9686	81.0533	2.00274	1.93001	0	0
XM_011471868.1	101307932	product=NAC domain-containing protein 86	378	6.74613	1482	26.5858	2.11933	1.92952	1.0024e-156	3.76098e-155
XM_011465743.1	101314659	product=alpha-glucan water dikinase 1%2C chloroplastic%2C transcript variant X5	2683	22.3664	9682	81.1298	2.00215	1.92941	0	0
XM_004301839.1	101312164	product=anthocyanidin 3-O-glucosyltransferase 5-like	1628	41.5988	336	8.62989	-2.12209	-1.92528	3.98494e-199	1.92057e-197
XM_004296622.2	101302155	product=sulfate transporter 3.1-like%2C transcript variant X1	345	4.40011	1356	17.3838	2.12266	1.92421	1.05195e-143	3.64367e-142
XM_011464242.1	101302155	product=sulfate transporter 3.1-like%2C transcript variant X2	345	4.73241	1355	18.6828	2.12159	1.92313	6.57938e-144	2.28431e-142
XM_011471793.1	105353113	product=probable pectinesterase/pectinesterase inhibitor 60	60	0.780353	4	0.0522925	-3.45773	-1.92203	6.26793e-14	3.11674e-13
XM_011469350.1	101306160	product=7-deoxyloganetin glucosyltransferase-like%2C transcript variant X2	123	1.37389	16	0.179641	-2.71566	-1.92149	1.33105e-21	9.00886e-21
XM_004305831.2	101306160	product=7-deoxyloganetin glucosyltransferase-like%2C transcript variant X1	123	1.90635	16	0.249263	-2.71566	-1.92149	1.33105e-21	9.00886e-21
XM_004291048.2	101301353	product=heat stress transcription factor B-4	1502	27.8999	309	5.76939	-2.12643	-1.92145	2.49562e-184	1.10467e-182
XM_004309930.2	101302228	product=uncharacterized LOC101302228%2C transcript variant X2	395	9.22376	1535	36.0295	2.10668	1.92075	2.5122e-170	1.03683e-168
XM_004301853.2	101292030	product=transcription repressor OFP7	92	1.77046	8	0.154749	-3.21816	-1.91943	3.57214e-19	2.2158e-18
XM_004304002.2	101314970		NA	1996	NA	1996	-1.99276	-1.91896	NA	NA
XM_004291031.2	101296450	product=probable inactive receptor kinase At5g67200	871	11.3602	171	2.24183	-2.19084	-1.91872	1.53306e-111	4.25814e-110
XM_004306983.2	101304033	product=glucomannan 4-beta-mannosyltransferase 9-like	390	7.36301	69	1.30942	-2.33066	-1.91439	1.09709e-54	1.56515e-53
XM_004302707.2	101298436	product=soluble inorganic pyrophosphatase 1%2C transcript variant X1	1835	51.413	6618	186.382	2.00113	1.91329	0	0
XM_004296502.2	101313203	product=transcription factor PRE6-like	247	8.59991	40	1.3999	-2.44557	-1.91254	3.25908e-37	3.29654e-36
XM_004293987.2	101299360	product=arogenate dehydratase/prephenate dehydratase 6%2C chloroplastic	2433	45.1934	521	9.72768	-2.07013	-1.91084	4.62326e-288	3.05814e-286
XM_011465886.1	101293597	product=protein STICHEL-like 2	206	1.93962	32	0.302858	-2.49801	-1.90954	4.64332e-32	4.26263e-31
XM_004307446.2	101306464	product=expansin-A4-like	117	2.61454	501	11.2535	2.23998	1.90742	1.34478e-58	2.06856e-57
XM_004291611.2	101304064	product=stem-specific protein TSJT1-like	1800	62.0271	6467	224.002	1.9956	1.90688	0	0
XM_004299615.2	101300148	product=serine/threonine-protein kinase SAPK2-like	230	5.22519	921	21.0316	2.14795	1.90651	4.47733e-100	1.13103e-98
XM_004297761.2	101313979	product=protein NRT1/ PTR FAMILY 2.13-like	1230	20.2827	4467	74.0417	2.01088	1.90387	0	0
XM_004303254.2	101296121	product=umecyanin-like	11	0.347548	83	2.63596	2.95843	1.90315	2.70814e-15	1.4384e-14
XM_011466259.1	101306428		NA	2033	NA	2033	2.23287	1.90283	NA	NA
XM_011460396.1	101306408	product=uncharacterized LOC101306408%2C transcript variant X3	18	0.43953	108	2.65081	2.67134	1.90275	4.16884e-17	2.39529e-16
XM_004292590.2	101306408	product=uncharacterized LOC101306408%2C transcript variant X1	18	0.415586	108	2.5064	2.67134	1.90275	2.42661e-17	1.40375e-16
XM_011468293.1	101298436	product=soluble inorganic pyrophosphatase 1%2C transcript variant X2	1846	46.9739	6599	168.788	1.98836	1.90069	0	0
XM_004290399.2	101297794	product=benzyl alcohol O-benzoyltransferase	1382	29.336	287	6.1237	-2.11258	-1.8999	1.52628e-168	6.20314e-167
XM_004291502.2	101290923	product=uncharacterized protein At5g22580	338	14.9971	59	2.63138	-2.34717	-1.89955	4.84034e-48	6.18024e-47
XM_011462321.1	105350386	product=uncharacterized LOC105350386	184	7.27159	28	1.11227	-2.52232	-1.89808	3.87702e-29	3.26554e-28
	101308333		189	5.76406	29	0.889004	-2.51189	-1.89706	9.44582e-30	8.07677e-29
XM_004305746.2	101301034	product=polygalacturonase QRT3-like	50	1.12482	3	0.0678382	-3.52135	-1.89577	4.16771e-12	1.87771e-11
XM_011471571.1	101314995	product=18.1 kDa class I heat shock protein-like	3326	144.617	733	32.0361	-2.02929	-1.89427	0	0
XM_004309398.2	101298763	product=polygalacturonase inhibitor	96	2.24172	417	9.78782	2.25852	1.89338	1.17141e-49	1.53172e-48
XM_011460394.1	101295772	product=uncharacterized LOC101295772%2C transcript variant X2	335	7.47248	1290	28.9234	2.09303	1.89125	2.24085e-134	7.27172e-133
XM_004305123.2	101303632	product=galactose oxidase	1747	28.3018	372	6.05763	-2.07738	-1.88958	2.25807e-208	1.12723e-206
XM_004308879.2	101295962	product=anthranilate synthase alpha subunit 1%2C chloroplastic	40	0.598566	2	0.030083	-3.62151	-1.88951	2.80955e-10	1.13917e-09
XM_004304423.2	101300167	product=probable xyloglucan endotransglucosylase/hydrolase protein 32%2C transcript variant X1	297	5.97756	51	1.03176	-2.36765	-1.88908	7.30979e-43	8.38024e-42
XM_011460395.1	101306408	product=uncharacterized LOC101306408%2C transcript variant X2	18	0.424354	107	2.53559	2.65804	1.88872	2.42661e-17	1.40375e-16
XM_011472372.1	101313465	product=cyclic nucleotide-gated ion channel 1-like	524	11.1103	99	2.10993	-2.24124	-1.88853	1.01511e-69	1.83616e-68
XR_908136.1	105353137	ncrna_class=lncRNA	29	0.876458	0	0	-4.75581	-1.8883	2.32872e-08	8.25682e-08
XM_011463923.1	101311085	product=GDSL esterase/lipase At4g16230-like	29	0.867921	0	0	-4.75581	-1.8883	2.32872e-08	8.25682e-08
XM_011463021.1	105350588	product=scarecrow-like protein 11	157	1.6399	23	0.241482	-2.56774	-1.88785	1.31447e-25	1.00385e-24
XM_004303252.2	101295541	product=palmitoyl-monogalactosyldiacylglycerol delta-7 desaturase%2C chloroplastic	177	3.98187	716	16.1907	2.16117	1.88723	6.06464e-79	1.23411e-77
XM_004307434.2	101302982	product=E3 ubiquitin-protein ligase RING1-like	556	9.01524	2064	33.6396	2.04147	1.88349	3.0857e-206	1.52737e-204
XM_004291264.2	101292658	product=L-ascorbate oxidase homolog	5426	90.0386	1232	20.5494	-1.9869	-1.88212	0	0
XM_004299749.2	101291435	product=plant intracellular Ras-group-related LRR protein 6	4	0.0790814	48	0.953882	3.44386	1.88143	4.91546e-11	2.08509e-10
XM_004310169.2	101304063		340	10.1756	1298	39.0478	2.08064	1.88012	4.41838e-134	1.43063e-132
XM_004293230.2	101314728	product=15.4 kDa class V heat shock protein	195	7.75618	778	31.1051	2.14185	1.8801	1.49048e-84	3.23522e-83
XM_011468202.1	101298153	product=probable sugar phosphate/phosphate translocator At3g11320	96	1.99306	412	8.59778	2.24116	1.87554	1.34467e-48	1.72971e-47
XM_004288249.2	101301331	product=tubulin alpha-3 chain	27477	606.661	6537	145.076	-1.92028	-1.8743	0	0
XM_011469839.1	101300167	product=probable xyloglucan endotransglucosylase/hydrolase protein 32%2C transcript variant X3	294	6.26605	51	1.09259	-2.35305	-1.87404	3.51143e-42	3.96132e-41
XM_011469838.1	101300167	product=probable xyloglucan endotransglucosylase/hydrolase protein 32%2C transcript variant X2	294	6.22289	51	1.08506	-2.35305	-1.87404	3.51143e-42	3.96132e-41
XM_004307326.2	101291963	product=probable acetyltransferase NATA1-like	447	16.5147	1668	61.9438	2.04849	1.87271	6.26766e-168	2.52977e-166
XM_004289721.2	101305612	product=serine carboxypeptidase-like 18	416	8.22005	77	1.52937	-2.26742	-1.8706	1.64931e-56	2.44708e-55
XM_011466125.1	101303814	product=type I inositol 1%2C4%2C5-trisphosphate 5-phosphatase 12%2C transcript variant X2	99	0.947145	11	0.105782	-2.90782	-1.8703	7.01262e-19	4.29538e-18
XM_004294575.2	101309431	product=ankyrin repeat-containing protein At5g02620-like	489	7.26733	1811	27.0535	2.03781	1.86948	8.76433e-181	3.79913e-179
XM_004309532.2	101293060	product=galactose oxidase-like	180	2.71448	28	0.424435	-2.49079	-1.86532	3.34064e-28	2.74666e-27
XM_004291619.2	101306403	product=NAC domain-containing protein 72-like	1013	22.7058	3607	81.2667	1.98222	1.86416	0	0
XM_011465459.1	101311194	product=3%2C9-dihydroxypterocarpan 6A-monooxygenase-like%2C transcript variant X6	66	0.532851	5	0.0405762	-3.33005	-1.86396	1.00359e-14	5.1935e-14
XM_011465458.1	101311194	product=3%2C9-dihydroxypterocarpan 6A-monooxygenase-like%2C transcript variant X5	66	0.532501	5	0.0405495	-3.33005	-1.86396	1.00359e-14	5.1935e-14
XM_004305783.2	101314400	product=uncharacterized LOC101314400	474	12.6646	90	2.41711	-2.23291	-1.8636	5.01078e-63	8.30961e-62
XM_004302514.2	101313131		NA	1722	NA	1722	-2.09685	-1.86217	NA	NA
XM_004300635.2	101299092	product=abscisic acid 8'-hydroxylase 1-like	406	6.8076	1513	25.5003	2.04634	1.86203	2.59071e-152	9.4305e-151
XM_004306909.2	101305980	product=uncharacterized LOC101305980	312	8.35437	1182	31.8138	2.06929	1.85997	2.26321e-121	6.76032e-120
XM_004302918.2	101312266	product=F-box protein At5g49610-like	343	6.76309	62	1.2288	-2.29791	-1.85921	1.2002e-47	1.52513e-46
XM_004306600.2	101306459	product=transcription factor MYB12-like	28839	817.327	6948	197.931	-1.90212	-1.85746	0	0
XM_004304164.2	101314198	product=alpha-1%2C4-glucan-protein synthase [UDP-forming] 2	403	8.0757	75	1.51069	-2.25921	-1.85719	1.33912e-54	1.90302e-53
XR_904972.1	101314730	product=phosphomethylpyrimidine synthase%2C chloroplastic%2C transcript variant X3	6586	92.5798	22201	313.694	1.90407	1.85717	0	0
XM_004309434.2	101311343	product=allene oxide cyclase 3%2C chloroplastic-like	1502	47.3344	324	10.2634	-2.05826	-1.85707	1.36161e-177	5.8162e-176
XM_011462622.1	101314730	product=phosphomethylpyrimidine synthase%2C chloroplastic%2C transcript variant X2	6599	102.795	22179	347.277	1.8998	1.85293	0	0
XM_011462621.1	101314730	product=phosphomethylpyrimidine synthase%2C chloroplastic%2C transcript variant X1	6599	103.583	22176	349.891	1.8996	1.85273	0	0
XM_011461844.1	101303598	product=G-type lectin S-receptor-like serine/threonine-protein kinase At4g03230	256	2.5996	44	0.449116	-2.36269	-1.84996	3.65325e-37	3.69142e-36
XM_004289565.2	101303655	product=glycine-rich protein DOT1-like	150	7.30615	601	29.4246	2.14629	1.84915	5.39863e-66	9.2838e-65
XM_011464708.1	105351134	product=uncharacterized LOC105351134	2	0.0372629	32	0.599289	3.61051	1.84846	2.5455e-08	8.99932e-08
	101309226		2	0.0349495	32	0.562082	3.61051	1.84846	2.5455e-08	8.99932e-08
XM_004300468.2	101294178	product=transcription factor MYB108-like	222	6.01434	37	1.00757	-2.40189	-1.84789	4.6396e-33	4.32837e-32
XM_011460994.1	105349919	product=uncharacterized LOC105349919	284	11.3329	50	2.00553	-2.33131	-1.84718	1.98526e-40	2.16341e-39
XM_004303844.2	101314772	product=transcription factor JUNGBRUNNEN 1-like	24	0.680708	129	3.67772	2.52959	1.84697	4.02517e-19	2.48944e-18
XM_004287302.2	101305100	product=uncharacterized LOC101305100	1634	38.3259	5649	133.184	1.94004	1.84655	0	0
XM_004300653.2	101305376	product=uncharacterized LOC101305376	122	4.47597	17	0.626924	-2.62151	-1.84567	9.17998e-21	6.05041e-20
XM_004293843.2	101302243	product=uncharacterized LOC101302243	274	9.59434	48	1.68945	-2.3375	-1.84427	3.45065e-39	3.65561e-38
XM_004290781.2	101293649	product=profilin-3	57	3.03712	4	0.214233	-3.38497	-1.84363	3.70759e-13	1.77261e-12
XM_011463983.1	101306323	product=long-chain-alcohol oxidase FAO1%2C transcript variant X2	862	10.8587	179	2.26654	-2.11029	-1.84271	3.08905e-105	8.12553e-104
XM_004290714.2	101298850	product=glutathione S-transferase F13-like	730	26.9703	149	5.53335	-2.13383	-1.84191	3.79789e-91	8.85359e-90
XM_004290579.2	101305326	product=sulfate transporter 3.1	1009	13.774	213	2.92272	-2.08759	-1.84128	4.92745e-122	1.48091e-120
XM_011463984.1	101306323	product=long-chain-alcohol oxidase FAO1%2C transcript variant X3	861	11.334	179	2.36849	-2.10861	-1.84101	7.00511e-106	1.85263e-104
XM_004296338.2	101306323	product=long-chain-alcohol oxidase FAO1%2C transcript variant X1	859	12.1259	179	2.53987	-2.10526	-1.8376	1.14894e-105	3.0331e-104
XM_004300191.2	101308180	product=transcription factor MYC2-like	5159	70.7141	1207	16.6298	-1.94367	-1.83751	0	0
XM_004308320.2	101315391	product=probable LRR receptor-like serine/threonine-protein kinase At1g34110	28	0.266016	0	0	-4.7069	-1.83462	4.04601e-08	1.41026e-07
XM_011465915.1	105351497	product=uncharacterized LOC105351497	255	4.93817	962	18.7258	2.06247	1.83134	9.67608e-99	2.42133e-97
XM_004287438.2	101299700	product=uncharacterized LOC101299700	153	6.27516	604	24.9006	2.12508	1.83028	1.99603e-65	3.41048e-64
XM_004297662.2	101306813	product=protein ASPARTIC PROTEASE IN GUARD CELL 2	262	3.93178	46	0.693881	-2.33325	-1.83003	1.7021e-37	1.73424e-36
XM_004304319.2	101291072	product=18 kDa seed maturation protein	257	11.9345	968	45.1842	2.0602	1.82991	3.43624e-99	8.6283e-98
XM_004301482.2	101295238	product=purple acid phosphatase 23%2C transcript variant X2	327	4.86956	60	0.898117	-2.27574	-1.82959	4.67005e-43	5.37708e-42
	101302899		334	5.47827	1233	20.3282	2.03219	1.82913	2.47535e-123	7.53221e-122
XM_004299663.2	101314089	product=laccase-14-like	4813	87.0772	1130	20.5497	-1.93856	-1.82884	0	0
XM_004303451.2	101310533	product=protein YLS9-like	569	19.2831	2031	69.1852	1.98494	1.82805	5.41546e-195	2.54309e-193
XM_004290595.2	101311145	product=beta-carotene isomerase D27%2C chloroplastic%2C transcript variant X1	190	5.12856	732	19.8606	2.09132	1.82519	6.40762e-77	1.27297e-75
XM_011460303.1	101311145	product=beta-carotene isomerase D27%2C chloroplastic%2C transcript variant X2	190	5.14741	731	19.9063	2.08935	1.82318	4.02095e-77	8.01536e-76
XM_004306701.2	101313736	product=probable polygalacturonase	2168	45.445	492	10.3665	-1.98629	-1.82154	6.99258e-245	4.02561e-243
XM_004290857.2	101293061	product=amino acid permease 3-like	604	10.8004	2139	38.4463	1.97368	1.82119	1.47283e-203	7.20509e-202
XM_011465180.1	101297183	product=cellulose synthase-like protein H1%2C transcript variant X3	120	1.43237	17	0.203969	-2.59786	-1.82086	2.17264e-18	1.30101e-17
XM_011465175.1	101297183	product=cellulose synthase-like protein H1%2C transcript variant X2	120	1.42545	17	0.202983	-2.59786	-1.82086	5.84468e-20	3.74927e-19
XM_004291025.2	101294818	product=putative receptor protein kinase ZmPK1	232	2.90565	40	0.503564	-2.35556	-1.81948	8.94466e-34	8.47689e-33
XM_004305592.2	101295443	product=secoisolariciresinol dehydrogenase-like	368	5.65837	1340	20.7104	2.01269	1.81876	5.06639e-132	1.61546e-130
XM_004302216.2	101296784	product=probable protein phosphatase 2C 34	1144	24.9298	3926	85.9968	1.92916	1.81751	0	0
XM_004289106.2	101295084	product=uncharacterized LOC101295084%2C transcript variant X1	62	0.870211	272	3.83743	2.26656	1.81732	2.44432e-31	2.18505e-30
XM_004287983.2	101293132	product=transcription factor HEC2-like	86	2.81613	8	0.26332	-3.12194	-1.8166	1.17257e-17	6.85005e-17
XM_004300926.2	101293689	product=zinc finger protein 6	56	2.16665	4	0.15556	-3.35988	-1.81652	6.7045e-13	3.16466e-12
XM_004299391.2	101304674	product=putative glucuronosyltransferase PGSIP8	569	9.20983	2014	32.7671	1.97282	1.81577	1.11681e-191	5.16183e-190
XM_004289499.2	101292461	product=probable glycerol-3-phosphate acyltransferase 2	4	0.0834673	46	0.964836	3.38374	1.81553	1.62593e-10	6.70485e-10
XM_004291843.2	101303671	product=cytochrome P450 734A1-like%2C transcript variant X2	10	0.201926	77	1.56287	2.97705	1.81443	6.7904e-14	3.37253e-13
XM_011466566.1	101295238	product=purple acid phosphatase 23%2C transcript variant X4	328	4.81254	61	0.899642	-2.25667	-1.81342	1.44106e-44	1.72146e-43
XM_011465074.1	101310892	product=aldehyde dehydrogenase family 2 member B7%2C mitochondrial-like%2C transcript variant X1	210	4.24742	795	16.1627	2.0666	1.81261	1.3245e-80	2.75651e-79
XM_004297308.2	101295995	product=uncharacterized LOC101295995	1129	26.5825	246	5.82204	-2.04266	-1.81231	6.5414e-133	2.10872e-131
XM_004305421.2	101307913	product=AP2-like ethylene-responsive transcription factor At1g16060	212	4.34991	36	0.742483	-2.37418	-1.81216	2.69459e-31	2.40657e-30
XM_004309489.2	101303763	product=uncharacterized LOC101303763	2028	33.5769	462	7.68872	-1.98061	-1.81062	1.86992e-228	1.01848e-226
XM_004306058.2	101309282	product=cyclic nucleotide-gated ion channel 2	1161	17.7112	3962	60.7533	1.92106	1.81015	0	0
XM_004289827.2	101315293	product=heavy metal-associated isoprenylated plant protein 26	1150	50.7206	3924	173.962	1.92088	1.80945	0	0
XM_011460922.1	101292278	product=putative pleiotropic drug resistance protein 7%2C transcript variant X1	1374	11.011	305	2.45686	-2.01675	-1.80895	7.13553e-159	2.70845e-157
XM_011466564.1	101295238	product=purple acid phosphatase 23%2C transcript variant X1	327	4.83248	61	0.906132	-2.25228	-1.80889	2.80111e-43	3.24687e-42
XM_011464560.1	101297428	product=transcription factor HY5-like%2C transcript variant X3	211	7.39537	796	28.0433	2.06159	1.80809	1.24907e-80	2.60139e-79
XM_004287040.2	101300274	product=aldehyde dehydrogenase family 2 member C4-like	12	0.261656	80	1.75339	2.79049	1.80791	5.64345e-14	2.81194e-13
XM_004298925.2	101310700	product=probable LRR receptor-like serine/threonine-protein kinase At4g26540	394	3.48463	76	0.675638	-2.20784	-1.80699	4.0291e-52	5.52997e-51
XM_004292309.2	101302725	product=uncharacterized LOC101302725	385	6.85778	74	1.32493	-2.21256	-1.80673	4.24699e-51	5.72182e-50
XM_011465549.1	101313699	product=uncharacterized LOC101313699%2C transcript variant X4	211	1.98417	36	0.340281	-2.36739	-1.80511	4.83721e-30	4.16529e-29
XM_011464127.1	101312623		NA	1930	NA	1930	-1.95606	-1.80455	NA	NA
XM_004302989.2	101308590	product=glucomannan 4-beta-mannosyltransferase 9-like	71	1.22331	6	0.103913	-3.21149	-1.80388	2.83833e-15	1.50537e-14
XM_004303877.2	101300745	product=putative laccase-9	1244	21.3341	275	4.74052	-2.02233	-1.80385	1.58252e-144	5.52053e-143
XM_004296998.2	101297428	product=transcription factor HY5-like%2C transcript variant X4	211	7.42359	793	28.0443	2.05615	1.80254	4.96081e-80	1.02155e-78
XM_004306822.2	101302977	product=probable pre-mRNA-splicing factor ATP-dependent RNA helicase	1037	8.4724	226	1.85599	-2.04196	-1.8019	3.19587e-122	9.62471e-121
XM_004294930.2	101298982	product=protein YLS3	868	36.0007	186	7.75431	-2.06524	-1.80179	5.08348e-104	1.31824e-102
XM_004305732.2	101296134	product=subtilisin-like protease	5885	75.2392	1420	18.2484	-1.8993	-1.80104	0	0
XM_004294823.2	101314832	product=uncharacterized LOC101314832	370	3.76242	71	0.725709	-2.21427	-1.80047	3.11287e-49	4.03435e-48
XM_011468939.1	101311109	product=protein YLS9-like	2	0.0320067	31	0.498668	3.56612	1.79924	4.67898e-08	1.62181e-07
XM_004297593.2	101310892	product=aldehyde dehydrogenase family 2 member B7%2C mitochondrial-like%2C transcript variant X2	210	4.12963	787	15.5563	2.05203	1.79774	3.29951e-82	6.97084e-81
XM_004296975.2	101290946	product=rho GDP-dissociation inhibitor 1-like	128	3.72206	19	0.55535	-2.53822	-1.79671	4.92793e-21	3.27074e-20
XM_011461262.1	101303671	product=cytochrome P450 734A1-like%2C transcript variant X1	13	0.187605	82	1.18947	2.71876	1.7959	2.015e-14	1.02652e-13
XM_011467099.1	105351742	product=uncharacterized LOC105351742	398	10.072	1419	36.0957	1.98251	1.79543	1.09835e-136	3.62035e-135
XM_011464558.1	101297428	product=transcription factor HY5-like%2C transcript variant X1	223	7.37434	830	27.589	2.04243	1.79527	2.46323e-84	5.323e-83
XM_011464561.1	101297428	product=transcription factor HY5-like%2C transcript variant X5	211	7.4024	789	27.8232	2.04887	1.7951	9.75421e-84	2.09859e-82
XM_011466565.1	101295238	product=purple acid phosphatase 23%2C transcript variant X3	319	4.75235	60	0.89848	-2.24011	-1.7929	8.63039e-45	1.03392e-43
XM_004297508.2	101306326	product=SNF1-related protein kinase regulatory subunit gamma-1	907	19.7885	3086	67.677	1.91652	1.79116	2.53503e-280	1.64345e-278
XM_011464559.1	101297428	product=transcription factor HY5-like%2C transcript variant X2	223	7.40089	827	27.5882	2.03721	1.78995	4.95649e-82	1.04565e-80
XM_011464562.1	101297428	product=transcription factor HY5-like%2C transcript variant X6	211	7.43068	786	27.8233	2.04338	1.7895	1.97894e-81	4.14502e-80
XM_011466567.1	101295238	product=purple acid phosphatase 23%2C transcript variant X5	318	4.76247	60	0.903224	-2.2356	-1.78826	4.6207e-45	5.56974e-44
XM_004294260.2	101311451	product=probable N-acetyltransferase HLS1	291	5.99088	54	1.11746	-2.25739	-1.78807	5.40814e-40	5.82628e-39
XM_004292812.2	101306701	product=proline-rich receptor-like protein kinase PERK15	137	1.69	21	0.260391	-2.49801	-1.78695	5.00968e-22	3.44194e-21
XR_905744.1	101295084	product=uncharacterized LOC101295084%2C transcript variant X2	60	0.805645	259	3.49568	2.24271	1.7856	2.94573e-33	2.75779e-32
XM_004294606.2	101295024	product=transcription factor PCL1%2C transcript variant X2	16	0.457678	92	2.64525	2.60277	1.7856	8.56707e-40	9.18891e-39
XM_004305346.2	101304794	product=dirigent protein 22-like	180	6.93511	30	1.16183	-2.39457	-1.78459	4.03067e-27	3.20604e-26
XM_004297142.2	101296089	product=UDP-glycosyltransferase 89A2-like	2706	51.8041	639	12.2964	-1.92947	-1.78402	1.01941e-294	6.93078e-293
XM_004303866.2	101296881	product=DEAD-box ATP-dependent RNA helicase 53-like	576	8.94612	1990	31.0674	1.93793	1.78137	1.4186e-184	6.29835e-183
XM_004294180.2	101310968	product=alpha-glucan phosphorylase%2C H isozyme	5161	61.8644	16572	199.674	1.83391	1.78065	0	0
XM_004309637.2	101306003	product=monothiol glutaredoxin-S6-like	175	9.28424	659	35.1425	2.05797	1.78025	4.07821e-68	7.23827e-67
XM_011459534.1	101308931	product=cyclin-D1-1-like%2C transcript variant X1	27	0.722974	0	0	-4.65628	-1.7789	6.71998e-07	2.10819e-06
XM_004299051.2	101299672	product=organ-specific protein P4-like	5909	241.814	1451	59.6863	-1.87404	-1.77664	0	0
XM_011460926.1	101294038	product=probable protein phosphatase 2C 22%2C transcript variant X3	287	7.18898	1033	26.0091	1.99517	1.77582	5.05371e-101	1.28661e-99
XM_004307284.2	101303745	product=ras-related protein RABC2a-like	14	0.232629	84	1.40299	2.65358	1.77447	7.95959e-14	3.93521e-13
XM_011460925.1	101294038	product=probable protein phosphatase 2C 22%2C transcript variant X1	307	6.68612	1098	24.0368	1.98627	1.77386	1.47345e-106	3.92158e-105
XM_004291817.2	101295778	product=isoflavone reductase-like protein	91	2.45093	367	9.93562	2.15108	1.7733	3.1121e-41	3.44258e-40
XM_011472154.1	101299619		NA	2202	NA	2202	2.12386	1.77195	NA	NA
XM_011469126.1	101297461	product=AP2-like ethylene-responsive transcription factor AIL1	121	1.9741	18	0.295186	-2.53173	-1.77166	6.0048e-20	3.84946e-19
XM_004293913.2	101299840	product=probable LRR receptor-like serine/threonine-protein kinase At2g24230	1445	21.9438	331	5.05256	-1.97173	-1.77146	1.30921e-162	5.09481e-161
XR_905971.1	101297376	ncrna_class=lncRNA	37	1.18219	2	0.0642327	-3.51189	-1.7701	1.68611e-09	6.47252e-09
XR_905967.1	101297376	ncrna_class=lncRNA	37	0.855867	2	0.0465022	-3.51189	-1.7701	1.68611e-09	6.47252e-09
XR_905965.1	101297376	ncrna_class=lncRNA	37	0.961418	2	0.0522372	-3.51189	-1.7701	1.68611e-09	6.47252e-09
XR_905961.1	101297376	ncrna_class=lncRNA	37	0.808206	2	0.0439127	-3.51189	-1.7701	1.68611e-09	6.47252e-09
XM_004291434.2	101294038	product=probable protein phosphatase 2C 22%2C transcript variant X2	307	6.70593	1095	24.0422	1.98232	1.76985	5.68963e-106	1.50744e-104
XM_004302935.2	101292138	product=alpha carbonic anhydrase 1%2C chloroplastic	314	7.76506	60	1.49144	-2.21739	-1.7695	3.59234e-42	4.04714e-41
XM_004301128.2	101293101	product=ethylene-responsive transcription factor ERF039-like	9	0.385866	74	3.18908	3.05797	1.76935	2.68084e-14	1.35887e-13
XM_004304704.2	101311782	product=uncharacterized LOC101311782	183	2.56755	681	9.60404	2.04114	1.76901	1.60899e-69	2.90142e-68
XM_004289675.2	101314611	product=DUF21 domain-containing protein At2g14520-like	228	4.15764	832	15.2502	2.01405	1.76898	6.92565e-83	1.4738e-81
XM_004309252.2	101308142	product=putative UDP-glucose flavonoid 3-O-glucosyltransferase 3	110	2.1358	432	8.43123	2.11489	1.76893	4.37263e-47	5.52289e-46
XR_908186.1	105353199	ncrna_class=lncRNA	98	2.51107	13	0.334823	-2.67092	-1.76547	2.23065e-17	1.29256e-16
XM_004302511.2	101312263	product=omega-3 fatty acid desaturase%2C chloroplastic-like	83	1.66777	337	6.80653	2.15964	1.76516	3.13978e-38	3.24762e-37
XM_004306827.2	101304321	product=probable fructokinase-7	1	0.0257304	22	0.568995	3.67464	1.76508	2.00664e-06	6.02279e-06
XM_004290762.2	101313085	product=probable pectinesterase/pectinesterase inhibitor 7	1	0.0159549	22	0.352821	3.67464	1.76508	2.00664e-06	6.02279e-06
	101269083	product=tRNA-Asn	1	0.512107	22	11.3246	3.67464	1.76508	NA	NA
XM_011469658.1	101297282	product=ATP-dependent zinc metalloprotease FTSH 6%2C chloroplastic	1563	22.7608	363	5.31343	-1.95215	-1.76045	1.22455e-173	5.14084e-172
	101297671		69	1.12473	6	0.0983084	-3.17085	-1.76011	9.15589e-15	4.74606e-14
XM_004306796.2	101295270	product=serine/arginine-rich splicing factor RS41-like%2C transcript variant X1	667	20.4774	2250	69.4339	1.90372	1.75767	5.23159e-203	2.55502e-201
XM_011471666.1	105353079	product=uncharacterized LOC105353079	320	9.91507	62	1.93098	-2.19807	-1.75645	1.56173e-42	1.77515e-41
XM_004291181.2	101292569	product=probable serine/threonine-protein kinase At4g35230	1059	19.9017	3493	65.983	1.87189	1.75535	4.40392e-306	3.10959e-304
XM_004292979.2	101312607	product=cucumisin-like	57	0.857481	243	3.67447	2.22383	1.75483	3.29936e-29	2.7854e-28
XM_004304401.2	101293026	product=OTU domain-containing protein 5%2C transcript variant X1	456	6.33515	1566	21.8687	1.92882	1.75305	9.75655e-145	3.40758e-143
XM_004304889.2	101301317	product=uncharacterized LOC101301317	94	2.02096	12	0.259328	-2.71834	-1.75242	5.10893e-17	2.92339e-16
XM_004290455.2	101315010	product=cellulose synthase A catalytic subunit 2 [UDP-forming]-like	5842	52.4864	1463	13.212	-1.84572	-1.74852	0	0
XM_004305536.2	101302774	product=aluminum-activated malate transporter 8	2	0.0372065	30	0.560983	3.52031	1.74831	8.6047e-08	2.93173e-07
XM_004292895.2	101307757	product=thaumatin-like protein 1b	2	0.0476686	30	0.718726	3.52031	1.74831	8.6047e-08	2.93173e-07
XM_011467733.1	105351992	product=probable leucine-rich repeat receptor-like protein kinase At5g63930	194	1.74084	34	0.306673	-2.32697	-1.74822	3.11651e-28	2.56526e-27
XM_004302407.2	101304012	product=glycine-rich RNA-binding protein RZ1A	1062	20.384	3485	67.2369	1.86451	1.74805	1.37765e-303	9.63468e-302
XM_011465547.1	101313699	product=uncharacterized LOC101313699%2C transcript variant X1	212	2.00636	38	0.36149	-2.29823	-1.74723	4.55946e-31	4.04376e-30
XM_004298691.2	101313699	product=uncharacterized LOC101313699%2C transcript variant X3	212	2.03509	38	0.366667	-2.29823	-1.74723	2.87878e-30	2.49392e-29
XM_004298530.2	101303996	product=probable polygalacturonase non-catalytic subunit JP650	1775	30.4264	420	7.23671	-1.92566	-1.74685	1.06473e-193	4.97606e-192
XM_004298364.2	101299579	product=galactoside 2-alpha-L-fucosyltransferase	4	0.0699984	44	0.773963	3.321	1.7465	5.36886e-10	2.13407e-09
	101300412		215	3.96966	776	14.4018	1.99796	1.74545	1.40278e-76	2.77741e-75
XM_004298261.2	101314849	product=transcription factor TCP18	82	1.11939	8	0.109774	-3.05404	-1.74376	1.19216e-16	6.73099e-16
XM_004301767.2	101309359	product=beta-amylase 1%2C chloroplastic-like	928	15.2618	3051	50.4358	1.86708	1.74262	1.26176e-266	7.86666e-265
XM_004306728.2	101298060	product=aquaporin PIP1-3	6299	201.61	1589	51.1215	-1.83525	-1.74187	0	0
XM_011460924.1	101292278	product=putative pleiotropic drug resistance protein 7%2C transcript variant X2	1208	11.6295	279	2.69984	-1.95924	-1.74133	2.61506e-135	8.5715e-134
XM_011472070.1	101294513	product=low-temperature-induced 65 kDa protein%2C transcript variant X7	5432	94.2084	16954	295.557	1.79297	1.74087	0	0
XM_004290888.2	101302719	product=isoflavone 2'-hydroxylase-like	18	0.347846	97	1.88419	2.51786	1.74035	8.77691e-15	4.55203e-14
XM_004297429.2	101306715	product=galactinol synthase 1	3765	99.2294	11832	313.453	1.80279	1.74031	0	0
XM_011465548.1	101313699	product=uncharacterized LOC101313699%2C transcript variant X2	211	2.06748	38	0.374267	-2.29144	-1.74019	2.87878e-30	2.49392e-29
XM_004308360.2	101306574	product=cytochrome P450 71A25-like	5	0.095473	50	0.959666	3.23854	1.73831	7.55216e-11	3.16687e-10
XM_004297377.2	101291816	product=RNA-dependent RNA polymerase 1%2C transcript variant X1	3534	34.3811	874	8.54682	-1.86328	-1.73805	0	0
XM_011466127.1	101303814	product=type I inositol 1%2C4%2C5-trisphosphate 5-phosphatase 12%2C transcript variant X3	100	0.928056	14	0.1306	-2.60024	-1.73739	3.68753e-17	2.11957e-16
XM_004306715.2	101293816	product=BURP domain-containing protein 3-like	16911	474.533	4392	123.879	-1.79369	-1.73715	0	0
XM_011464860.1	101291816	product=RNA-dependent RNA polymerase 1%2C transcript variant X2	3526	35.1377	874	8.75471	-1.86001	-1.73475	0	0
XM_004299257.2	101313894	product=PLASMODESMATA CALLOSE-BINDING PROTEIN 3	3062	91.0493	756	22.596	-1.8655	-1.731	0	0
XM_011463406.1	105350662	product=dirigent protein 23-like	754	26.9653	168	6.03925	-2.00838	-1.73051	8.45891e-88	1.90086e-86
XM_004289880.2	101307164	product=desiccation-related protein PCC13-62-like	1857	28.1194	446	6.78841	-1.90433	-1.73044	7.3522e-200	3.57876e-198
XM_011466258.1	101308708	product=ethylene-responsive transcription factor ERF110-like%2C transcript variant X2	12	0.216892	76	1.38075	2.71743	1.72898	5.16011e-13	2.4485e-12
XM_004288031.2	101308708	product=ethylene-responsive transcription factor ERF110-like%2C transcript variant X1	12	0.207923	76	1.32365	2.71743	1.72898	5.16011e-13	2.4485e-12
XM_011464451.1	101305361	product=uncharacterized LOC101305361	36	0.7399	2	0.041318	-3.47341	-1.72802	3.06815e-09	1.15769e-08
XM_004297412.2	101301770	product=21 kDa protein	1615	60.271	385	14.4423	-1.91468	-1.72792	2.96161e-175	1.2523e-173
XM_011460764.1	101294145	product=glutamate receptor 2.7-like%2C transcript variant X2	245	2.30154	864	8.15842	1.96512	1.72753	3.101e-40	3.3599e-39
XM_004297579.2	101306622	product=inositol oxygenase 1-like	234	6.5314	828	23.2306	1.96979	1.72691	6.18265e-80	1.27226e-78
XM_004303420.2	101301599	product=transcription factor TT2-like	1718	59.6474	412	14.3782	-1.90628	-1.72552	2.63741e-185	1.17453e-183
XM_004306756.2	101307334	product=transcription repressor MYB6	173	3.38937	30	0.590791	-2.33767	-1.72536	1.61091e-25	1.228e-24
XM_011470695.1	101290986	product=E3 ubiquitin-protein ligase At3g02290%2C transcript variant X2	259	7.16949	907	25.2369	1.95526	1.72384	2.66109e-80	5.50303e-79
XM_004307751.2	101301047	product=leucine-rich repeat receptor-like protein kinase TDR	895	8.79301	204	2.01458	-1.9768	-1.72333	6.70237e-102	1.71229e-100
XR_907717.1	101290986	product=E3 ubiquitin-protein ligase At3g02290%2C transcript variant X3	239	6.80489	842	24.0976	1.96358	1.72307	2.24439e-86	4.9561e-85
XM_004300500.2	101304677	product=L-ascorbate oxidase homolog	604	10.5348	132	2.3142	-2.03443	-1.72284	7.9283e-72	1.47133e-70
XM_011466518.1	101297543	product=uncharacterized LOC101297543	7	0.153267	61	1.34252	3.10527	1.72232	2.57765e-12	1.17524e-11
XM_011459630.1	101305915	product=uncharacterized LOC101305915%2C transcript variant X1	321	6.20976	64	1.24448	-2.15747	-1.72119	2.97561e-40	3.22703e-39
XM_011460369.1	101300885	product=receptor-like cytosolic serine/threonine-protein kinase RBK2	26	0.393863	0	0	-4.60381	-1.72096	1.23275e-07	4.14732e-07
XM_004309996.2	101297692	product=DNA polymerase alpha subunit B	26	0.451348	1	0.0174493	-3.60381	-1.72096	2.19006e-07	7.218e-07
XM_004287834.2	101296318	product=pheophytinase%2C chloroplastic	397	11.3123	1343	38.4657	1.90677	1.71827	2.25913e-122	6.81063e-121
XM_004295623.2	101295030	product=protein ROOT INITIATION DEFECTIVE 3-like	16	0.287779	88	1.59097	2.53935	1.71805	1.02167e-13	5.03077e-13
XR_907718.1	101290986	product=E3 ubiquitin-protein ligase At3g02290%2C transcript variant X4	239	6.82597	839	24.0862	1.95843	1.71782	6.95347e-81	1.4492e-79
XM_004299121.2	101295811	product=probable pectate lyase 18	1420	27.6586	338	6.61757	-1.91647	-1.71745	1.50008e-154	5.55012e-153
XM_011465048.1	101305365	product=transcription factor bHLH87	177	3.4169	638	12.38	1.99502	1.71738	3.3163e-63	5.50581e-62
XM_004292629.2	101294731	product=probable serine/threonine-protein kinase mps1%2C transcript variant X2	112	1.22359	17	0.186684	-2.49918	-1.71713	2.17264e-18	1.30101e-17
XM_004287913.2	101297183	product=cellulose synthase-like protein H1%2C transcript variant X1	112	1.50223	17	0.229196	-2.49918	-1.71713	2.75694e-20	1.7887e-19
XM_004287761.2	101298826	product=chaperone protein dnaJ 11%2C chloroplastic	1826	56.3412	5751	178.364	1.80567	1.71619	0	0
XM_004304370.2	101308110	product=fasciclin-like arabinogalactan protein 12	453	12.2815	96	2.61616	-2.07556	-1.71359	1.17057e-55	1.70908e-54
XM_004291356.2	101294426	product=cysteine proteinase 15A-like	4719	123.315	14479	380.315	1.76828	1.71228	0	0
XM_004307233.2	101312286	product=protein ECERIFERUM 1-like	81	1.38077	318	5.44882	2.11094	1.71024	4.159e-35	4.05561e-34
XM_004291754.2	101300595	product=protein TIC 20-v%2C chloroplastic	304	9.68798	1041	33.3464	1.92355	1.709	1.42789e-96	3.53391e-95
XM_004291326.2	101311067	product=endoglucanase 10-like	6439	123.269	1664	32.0206	-1.80046	-1.70897	0	0
XM_004287979.2	101292052	product=probable serine/threonine-protein kinase At1g01540	365	6.36019	1233	21.5963	1.90451	1.70803	2.46565e-112	6.90737e-111
XM_004297485.2	101299666	product=uncharacterized LOC101299666	1036	9.56651	3303	30.6578	1.82288	1.70456	3.09109e-278	1.99073e-276
XM_004301013.2	101306639	product=cytochrome P450 CYP736A12-like	380	4.53732	79	0.948161	-2.10064	-1.70416	1.14315e-47	1.45389e-46
XM_004301159.2	101303814	product=type I inositol 1%2C4%2C5-trisphosphate 5-phosphatase 12%2C transcript variant X1	102	0.922923	15	0.136426	-2.53542	-1.70414	2.90588e-17	1.67785e-16
XM_004307539.2	101310747	product=uncharacterized protein DDB_G0271670	25	0.694644	121	3.37945	2.38138	1.70346	7.76418e-17	4.41003e-16
XM_004306709.2	101290986	product=E3 ubiquitin-protein ligase At3g02290%2C transcript variant X1	268	7.13989	923	24.7171	1.93137	1.70332	1.96055e-86	4.33585e-85
XM_004292854.2	101294145	product=glutamate receptor 2.7-like%2C transcript variant X1	257	2.40936	886	8.34914	1.93264	1.6999	NA	NA
XM_004303639.2	101297752	product=growth-regulating factor 5-like	161	4.00023	28	0.699288	-2.33079	-1.69872	8.05849e-24	5.85514e-23
XM_004296018.2	101295904	product=receptor-like protein 12	205	1.79584	38	0.334608	-2.25002	-1.69719	1.07448e-28	8.93965e-28
XM_004304392.2	101315259	product=phenylalanine ammonia-lyase 1	33377	481.481	9027	130.892	-1.73534	-1.69567	0	0
XM_004290933.2	101291486	product=uncharacterized LOC101291486	29	1.0432	135	4.88137	2.33165	1.69537	4.24233e-18	2.51595e-17
XM_004297558.2	101298884	product=phospholipase D epsilon	138	1.84626	23	0.309301	-2.3829	-1.69482	3.59764e-21	2.39867e-20
XM_004287816.2	101314406	product=dehydrin Xero 1-like	290	11.0921	58	2.22989	-2.15115	-1.69397	7.53505e-38	7.72567e-37
XM_004306350.2	101310928	product=cystinosin homolog	0	0	21	0.67386	4.61051	1.69274	1.81105e-06	5.46036e-06
XM_004287574.2	101291561	product=growth-regulating factor 1%2C transcript variant X1	414	8.86977	88	1.89511	-2.07016	-1.6927	6.67034e-51	8.93331e-50
XM_004298896.2	101301678	product=probable inactive poly [ADP-ribose] polymerase SRO5	40	0.505611	174	2.21078	2.24474	1.69212	1.01108e-21	6.87899e-21
XM_004309348.2	101298185	product=probable acyl-activating enzyme 6	298	5.22232	60	1.05691	-2.14219	-1.69195	1.1682e-38	1.22126e-37
XM_011466660.1	105351650	product=hydroxymethylglutaryl-CoA lyase%2C mitochondrial-like	1740	21.251	428	5.25428	-1.86979	-1.6919	2.41884e-183	1.06585e-181
XM_011465461.1	101311194	product=3%2C9-dihydroxypterocarpan 6A-monooxygenase-like%2C transcript variant X8	66	0.591812	6	0.0540792	-3.10766	-1.69188	2.55586e-14	1.29698e-13
XM_004293288.2	101307464	product=ubiquinol oxidase 4%2C chloroplastic/chromoplastic	466	11.4624	1531	37.8535	1.865	1.69015	1.03676e-134	3.37558e-133
XM_011468493.1	101295258	product=heat stress transcription factor A-3	37	0.636609	163	2.81902	2.2607	1.6885	1.1886e-20	7.79706e-20
XM_011465518.1	101301205	product=heat stress transcription factor B-2b%2C transcript variant X1	90	1.17592	12	0.1576	-2.65628	-1.68611	6.87557e-14	3.41309e-13
XM_004294239.2	101303786	product=17.8 kDa class I heat shock protein-like	90	3.64265	12	0.488197	-2.65628	-1.68611	4.76929e-16	2.63018e-15
XM_004289723.2	101306187	product=serine carboxypeptidase-like 17	412	8.85264	88	1.90063	-2.06319	-1.68554	1.78393e-50	2.37611e-49
XM_004289305.2	101293048	product=putative F-box protein At5g60060	35	0.706354	2	0.0405717	-3.43388	-1.68467	5.58644e-09	2.06822e-08
XM_004297096.2	101306809	product=leucoanthocyanidin reductase-like	14276	334.422	3835	90.301	-1.74494	-1.68424	0	0
XM_004297258.2	101306226	product=sphinganine C(4)-monooxygenase 1	1318	34.7369	4104	108.723	1.78902	1.68369	0	0
XM_011462307.1	101291561	product=growth-regulating factor 1%2C transcript variant X2	407	8.65942	87	1.8606	-2.06192	-1.68217	7.45751e-50	9.82146e-49
XM_011467490.1	105351900	product=glycine-rich cell wall structural protein 1.8	382	20.1502	81	4.29477	-2.07257	-1.67999	3.40715e-47	4.30901e-46
XM_004291112.2	101296256	product=histidine-containing phosphotransfer protein 4-like	22	0.95097	108	4.69253	2.3957	1.67844	2.44394e-15	1.30067e-14
XM_011459632.1	101305915	product=uncharacterized LOC101305915%2C transcript variant X2	316	6.14528	65	1.2706	-2.11287	-1.67839	8.36573e-42	9.36725e-41
XM_004294357.2	101290740	product=beta-glucosidase 11-like%2C transcript variant X1	671	11.7311	2143	37.6598	1.82485	1.67823	1.43237e-177	6.10955e-176
XM_011464805.1	101311188	product=protein TWIN LOV 1%2C transcript variant X4	352	9.06343	1168	30.2296	1.87861	1.67816	2.08395e-104	5.4281e-103
XM_004294788.2	101303310	product=2-hydroxyisoflavanone dehydratase-like	1900	51.8167	475	13.0211	-1.84665	-1.67734	5.40996e-197	2.55691e-195
XM_004288483.2	101304328	product=glucan endo-1%2C3-beta-glucosidase 8-like%2C transcript variant X1	619	8.75473	1979	28.1344	1.82624	1.67369	4.77332e-163	1.86746e-161
XM_011470057.1	101292840	product=rhamnogalacturonate lyase B-like%2C transcript variant X3	167	2.29418	30	0.414258	-2.28704	-1.67259	3.69785e-24	2.71506e-23
XM_011470052.1	101292840	product=rhamnogalacturonate lyase B-like%2C transcript variant X1	167	2.21257	30	0.399522	-2.28704	-1.67259	3.69785e-24	2.71506e-23
XM_004288446.2	101292840	product=rhamnogalacturonate lyase B-like%2C transcript variant X2	167	2.33861	30	0.422282	-2.28704	-1.67259	3.69785e-24	2.71506e-23
XM_004291643.2	101314720	product=uncharacterized protein At5g41620	2193	29.0027	555	7.37789	-1.82933	-1.67229	2.04356e-224	1.10078e-222
XM_004294813.2	101310971	product=calcium uniporter protein 5%2C mitochondrial-like	163	3.88499	574	13.7516	1.96094	1.67113	1.059e-55	1.54928e-54
XM_011464802.1	101311188	product=protein TWIN LOV 1%2C transcript variant X2	382	7.44843	1254	24.5775	1.86335	1.67052	7.05259e-110	1.92782e-108
XM_011470424.1	101304328	product=glucan endo-1%2C3-beta-glucosidase 8-like%2C transcript variant X2	602	9.01574	1922	28.9333	1.82421	1.66952	4.25403e-168	1.71939e-166
XM_004303989.2	101310043	product=peroxidase 44	171	4.74421	31	0.864508	-2.27519	-1.66934	1.47957e-24	1.09623e-23
XM_011460468.1	101294731	product=probable serine/threonine-protein kinase mps1%2C transcript variant X1	113	1.20943	18	0.193649	-2.43388	-1.66879	4.53996e-18	2.69137e-17
XM_011465514.1	101292599	product=cytochrome P450 87A3-like	78	1.59511	8	0.164447	-2.98278	-1.66708	1.20227e-15	6.48564e-15
XR_905007.1	101290740	product=beta-glucosidase 11-like%2C transcript variant X2	667	14.3569	2114	45.7383	1.81382	1.66662	1.24521e-181	5.43791e-180
XM_004305984.2	101309760	product=dihydroflavonol-4-reductase-like	2541	68.7892	651	17.7148	-1.81194	-1.66658	1.24436e-256	7.44151e-255
XM_011465581.1	101304671	product=uncharacterized LOC101304671	572	10.1592	1827	32.617	1.82474	1.66611	3.61971e-155	1.34775e-153
XM_004296618.2	101300998	product=protein NETWORKED 1A	20177	112.927	5528	31.099	-1.71661	-1.6659	0	0
XM_004293400.2	101314441	product=cytochrome b561 and DOMON domain-containing protein At2g04850	268	5.29845	54	1.07312	-2.13902	-1.66584	6.39011e-35	6.21266e-34
XM_011465428.1	101307119	product=uncharacterized LOC101307119%2C transcript variant X2	58	1.61767	5	0.140175	-3.1466	-1.66574	1.11293e-12	5.18682e-12
XM_004300658.2	101307119	product=uncharacterized LOC101307119%2C transcript variant X1	58	1.60794	5	0.139332	-3.1466	-1.66574	1.11293e-12	5.18682e-12
XM_004299010.2	101310993	product=uncharacterized LOC101310993	350	5.97735	74	1.27031	-2.07543	-1.66571	1.74528e-43	2.02945e-42
XM_011465683.1	105351447	product=uncharacterized LOC105351447	358	18.2321	76	3.89052	-2.06998	-1.66525	2.67052e-44	3.17075e-43
XM_004294114.2	101313963	product=protein trichome birefringence-like 41	325	7.51775	68	1.58108	-2.08913	-1.66309	7.95612e-41	8.75143e-40
XM_011463185.1	101295161	product=uncharacterized transporter YBR287W%2C transcript variant X3	751	13.501	176	3.18038	-1.9359	-1.6628	2.35909e-82	4.99122e-81
XM_004291117.2	101297690	product=protein SAWADEE HOMEODOMAIN HOMOLOG 1-like	102	3.21445	376	11.9106	2.023	1.66149	7.94029e-39	8.32467e-38
XM_011469985.1	101298739	product=J protein JJJ1-like	76	2.98429	291	11.4858	2.07412	1.65977	1.52561e-31	1.37512e-30
XM_011468707.1	101309373	product=putative leucine-rich repeat receptor-like serine/threonine-protein kinase At2g24130	99	0.884492	15	0.134707	-2.49278	-1.659	1.89154e-16	1.06021e-15
XM_004298402.2	101311188	product=protein TWIN LOV 1%2C transcript variant X1	387	7.45135	1259	24.3663	1.85037	1.65856	1.36327e-110	3.75802e-109
XM_004292780.1	101295395	product=EIN3-binding F-box protein 2	161	5.37712	29	0.973556	-2.28188	-1.65766	2.61315e-23	1.86901e-22
XM_004290930.2	101315398	product=NADH dehydrogenase [ubiquinone] iron-sulfur protein 4%2C mitochondrial-like	686	32.3452	160	7.58308	-1.94217	-1.6563	5.05045e-77	1.00471e-75
XM_004304740.2	101299218	product=GDSL esterase/lipase At5g18430-like	195	4.38949	37	0.837182	-2.2157	-1.65469	5.88198e-27	4.65837e-26
XM_004293889.2	101293173	product=uncharacterized LOC101293173	20	0.703658	99	3.50111	2.40262	1.65443	2.89665e-14	1.46523e-13
XM_011472192.1	105353220		155	4.55025	542	15.9934	1.95048	1.65324	2.59664e-52	3.57059e-51
XM_004297411.2	101301481	product=endoglucanase 8	533	10.0834	121	2.30094	-1.97888	-1.65265	1.18702e-61	1.92918e-60
XM_011464803.1	101311188	product=protein TWIN LOV 1%2C transcript variant X3	377	7.37434	1222	24.0266	1.84504	1.65066	2.95396e-106	7.85479e-105
XM_004291755.2	101301168	product=fasciclin-like arabinogalactan protein 1	656	15.5449	153	3.6443	-1.94188	-1.64976	9.74009e-74	1.84973e-72
XM_004294589.2	101313291	product=laccase-17-like	628	10.8456	146	2.53447	-1.94617	-1.64744	7.25682e-71	1.33572e-69
XM_011462288.1	101310006	product=anthocyanidin 3-O-glucoside 2''-O-glucosyltransferase-like	285	5.98089	59	1.24455	-2.1019	-1.64678	2.66622e-36	2.65201e-35
XM_011460499.1	101304839	product=putative disease resistance protein At4g11170	198	1.34648	38	0.25975	-2.20014	-1.64536	3.88365e-27	3.09078e-26
XM_011463175.1	101295161	product=uncharacterized transporter YBR287W%2C transcript variant X1	776	13.8828	185	3.32679	-1.91153	-1.64447	3.15296e-85	6.88204e-84
XM_004287665.2	101295161	product=uncharacterized transporter YBR287W%2C transcript variant X4	776	13.9098	185	3.33326	-1.91153	-1.64447	8.5622e-84	1.84348e-82
XM_004307866.2	101312775	product=1-aminocyclopropane-1-carboxylate oxidase 5	1321	28.1546	330	7.06968	-1.84674	-1.64433	1.10942e-137	3.67754e-136
XM_004291361.2	101296452	product=RING finger and CHY zinc finger domain-containing protein 1%2C transcript variant X1	1236	14.1313	3752	43.1187	1.75228	1.64319	1.12821e-293	7.61748e-292
XM_004290829.2	101308732	product=acetyltransferase At1g77540	957	63.0111	233	15.4206	-1.88244	-1.64319	1.07403e-102	2.76074e-101
XM_011460838.1	101296452	product=RING finger and CHY zinc finger domain-containing protein 1%2C transcript variant X4	1220	14.2488	3705	43.4956	1.75288	1.64309	2.82883e-276	1.80595e-274
	101302251		50	1.26969	4	0.1021	-3.19942	-1.64231	2.337e-11	1.01139e-10
XM_004297757.2	101312822	product=D-galacturonate reductase	132	3.63756	466	12.9081	1.96307	1.64214	1.12721e-45	1.38204e-44
XM_011463184.1	101295161	product=uncharacterized transporter YBR287W%2C transcript variant X2	748	13.9787	178	3.34368	-1.91393	-1.64187	3.15296e-85	6.88204e-84
XM_011461725.1	105350207	product=keratin-associated protein 5-6	2	0.0822111	28	1.15691	3.4241	1.64078	2.91355e-07	9.48093e-07
XM_004291093.2	101315304	product=transcription factor MYB44-like	304	11.5082	64	2.4353	-2.07922	-1.64049	4.02756e-38	4.15708e-37
XM_004294960.2	101309809	product=tubulin alpha-3 chain%2C transcript variant X1	1624	35.2648	4868	106.254	1.73426	1.63883	0	0
XM_004307328.2	101292546	product=phenylalanine ammonia-lyase 1	13209	184.554	3663	51.4434	-1.69906	-1.63674	0	0
XM_004306654.2	101299415	product=common plant regulatory factor 1-like	333	6.26442	1078	20.3843	1.84285	1.63622	7.9977e-94	1.91938e-92
XM_011467894.1	101307999	product=GDSL esterase/lipase At1g09390%2C transcript variant X2	422	12.1561	94	2.72176	-2.00358	-1.63604	5.83182e-50	7.70816e-49
XM_011460837.1	101296452	product=RING finger and CHY zinc finger domain-containing protein 1%2C transcript variant X3	1195	14.0056	3614	42.5757	1.74686	1.63587	1.56318e-260	9.44451e-259
XM_004294219.2	101297707	product=chlorophyll a-b binding protein of LHCII type 1-like	19801	660.721	56446	1893.23	1.66233	1.63467	0	0
XM_004307816.2	101296522		NA	2449	NA	2449	-1.73835	-1.63407	NA	NA
XM_011470453.1	101296030	product=uncharacterized LOC101296030%2C transcript variant X3	21169	432.191	5936	121.817	-1.68314	-1.63406	0	0
XM_004302546.2	101297649	product=GDSL esterase/lipase CPRD49-like	115	4.5157	410	16.1827	1.97609	1.63347	8.38768e-41	9.22267e-40
XM_004297316.2	101298883	product=dnaJ homolog subfamily B member 3	19	0.484818	94	2.41097	2.39901	1.63309	1.29269e-13	6.32381e-13
XM_011465457.1	101311194	product=3%2C9-dihydroxypterocarpan 6A-monooxygenase-like%2C transcript variant X4	70	0.617764	7	0.0620957	-2.99867	-1.63285	2.56599e-12	1.17011e-11
XM_011465455.1	101311194	product=3%2C9-dihydroxypterocarpan 6A-monooxygenase-like%2C transcript variant X1	70	0.617321	7	0.0620512	-2.99867	-1.63285	5.28857e-14	2.6378e-13
XM_011471826.1	101296812	product=ATPase family AAA domain-containing protein 3-like	301	4.86557	979	15.907	1.84931	1.63231	7.57032e-86	1.66167e-84
XM_011470452.1	101296030	product=uncharacterized LOC101296030%2C transcript variant X2	21122	432.428	5930	122.032	-1.68139	-1.63228	0	0
XM_011463432.1	101307577	product=cell wall / vacuolar inhibitor of fructosidase 1	428	9.36007	96	2.11031	-1.99384	-1.62972	2.32651e-50	3.09319e-49
XM_011460775.1	101297909	product=pentatricopeptide repeat-containing protein At5g42310%2C mitochondrial	321	4.54175	1037	14.7481	1.83975	1.62931	4.12835e-90	9.52543e-89
XM_011460836.1	101296452	product=RING finger and CHY zinc finger domain-containing protein 1%2C transcript variant X2	1169	13.999	3521	42.3827	1.74096	1.6287	3.26886e-297	2.24853e-295
XM_011461145.1	101308643	product=uncharacterized LOC101308643	42	0.713974	3	0.0512618	-3.27519	-1.62797	4.8874e-10	1.94772e-09
XM_004302274.2	101313425	product=pectin acetylesterase 12-like	305	4.44501	987	14.4587	1.84206	1.62632	4.9881e-86	1.099e-84
XM_011471920.1	101314330	product=cyclic nucleotide-gated ion channel 1-like	82	2.6042	9	0.287305	-2.90203	-1.62541	5.61712e-16	3.0841e-15
XM_011460312.1	101293452	product=F-box protein At2g27310-like%2C transcript variant X2	192	4.07563	645	13.7623	1.89401	1.6248	3.64217e-54	5.13849e-53
XM_004293520.2	101302531	product=uncharacterized LOC101302531	1831	46.6243	475	12.1579	-1.79331	-1.62332	2.95621e-183	1.30069e-181
XM_011471707.1	101293831	product=histone acetyltransferase GCN5-like%2C transcript variant X1	37	0.798743	156	3.38508	2.19777	1.62254	1.7626e-19	1.10682e-18
XM_004302254.2	101307999	product=GDSL esterase/lipase At1g09390%2C transcript variant X1	422	8.8358	95	1.99938	-1.98847	-1.62238	1.57062e-49	2.04642e-48
XM_004302003.2	101304589	product=light-inducible protein CPRF2	371	8.74642	82	1.94316	-2.01304	-1.62104	2.05356e-44	2.44219e-43
XM_011460839.1	101296452	product=RING finger and CHY zinc finger domain-containing protein 1%2C transcript variant X5	1128	13.8638	3383	41.7939	1.73476	1.62044	4.50915e-264	2.73564e-262
XM_004300990.2	101297353	product=GDSL esterase/lipase At3g48460	2906	79.0768	775	21.198	-1.75432	-1.62035	1.09552e-281	7.13381e-280
XM_011460840.1	101296452	product=RING finger and CHY zinc finger domain-containing protein 1%2C transcript variant X6	1112	13.9841	3336	42.1691	1.73518	1.62004	5.35134e-285	3.50806e-283
XM_011472235.1	105353246	product=glycine-rich cell wall structural protein 2-like	84	6.97572	11	0.91821	-2.67335	-1.61938	3.35352e-15	1.77124e-14
XM_004298210.2	101295128	product=pleiotropic drug resistance protein 3-like	440	3.54535	100	0.809927	-1.97535	-1.61777	3.66566e-51	4.94316e-50
XM_004303883.2	101302472	product=7-deoxyloganetin glucosyltransferase-like	31	0.497399	135	2.17729	2.23854	1.61657	3.21167e-17	1.8515e-16
XM_004295013.2	101301660	product=probable WRKY transcription factor 48	218	4.12206	720	13.6845	1.87015	1.61655	9.56325e-65	1.61797e-63
XM_004291192.2	101295775	product=probable xyloglucan glycosyltransferase 5	1369	16.283	350	4.18445	-1.81355	-1.6164	1.69302e-139	5.69583e-138
XM_004294757.2	101294153	product=abscisic acid 8'-hydroxylase 4	263	4.22722	855	13.8135	1.84815	1.61631	3.58557e-75	6.95815e-74
XM_004306806.2	101298163	product=UDP-galactose/UDP-glucose transporter 2-like	1109	25.5727	3318	76.906	1.73127	1.61594	3.11345e-258	1.86572e-256
XM_011469343.1	101300464	product=putative laccase-9	279	5.15391	59	1.09553	-2.07131	-1.61517	5.22112e-35	5.07949e-34
XM_011463065.1	101295120	product=ethylene-responsive transcription factor RAP2-7-like%2C transcript variant X2	424	7.33627	1331	23.1487	1.79914	1.6149	1.83038e-112	5.14242e-111
XM_011468907.1	101294963	product=uncharacterized protein At2g24330%2C transcript variant X2	601	11.9267	1848	36.8628	1.76999	1.61442	1.17393e-149	4.19509e-148
XM_011463064.1	101295120	product=ethylene-responsive transcription factor RAP2-7-like%2C transcript variant X1	430	7.28622	1348	22.9595	1.79721	1.61421	2.97428e-111	8.24553e-110
XM_004303397.2	101294963	product=uncharacterized protein At2g24330%2C transcript variant X1	601	11.9589	1847	36.9423	1.76921	1.61363	7.74145e-150	2.76981e-148
XM_004307990.2	101303563	product=UDP-glycosyltransferase 88A1-like	1820	33.4863	476	8.80322	-1.78159	-1.61163	1.04285e-180	4.50718e-179
XM_011462026.1	101297704	product=calcium-binding protein PBP1-like	191	9.98935	636	33.4349	1.88127	1.61105	6.25205e-58	9.51213e-57
XM_004287620.2	101305878	product=uncharacterized LOC101305878	92	3.28701	14	0.502783	-2.48119	-1.61091	2.32322e-15	1.2371e-14
XM_004301586.2	101309358	product=E3 ubiquitin-protein ligase ORTHRUS 2-like	100	1.22619	16	0.197205	-2.41967	-1.60976	3.95387e-16	2.18976e-15
XM_004308114.2	101291472	product=probable rRNA-processing protein EBP2 homolog	346	8.9527	1096	28.5054	1.81163	1.60828	5.95151e-93	1.41098e-91
XM_011469607.1	101300166	product=membrane-anchored ubiquitin-fold protein 1%2C transcript variant X4	115	3.56024	403	12.5408	1.95131	1.60794	1.95361e-39	2.08132e-38
XM_011469606.1	101300166	product=membrane-anchored ubiquitin-fold protein 1%2C transcript variant X2	115	3.53944	403	12.4675	1.95131	1.60794	1.95361e-39	2.08132e-38
XM_004304200.2	101300166	product=membrane-anchored ubiquitin-fold protein 1%2C transcript variant X3	115	3.55427	403	12.5198	1.95131	1.60794	1.95361e-39	2.08132e-38
XR_904297.1	105349743	ncrna_class=lncRNA	82	6.23397	300	22.9251	2.00966	1.60782	4.28372e-31	3.80036e-30
XM_004294941.2	101303788	product=DEAD-box ATP-dependent RNA helicase 37-like	1615	22.3612	4736	65.9132	1.70262	1.60665	0	0
XM_004290739.2	101305904	product=probable E3 ubiquitin-protein ligase BAH1-like 1	203	4.43947	670	14.7282	1.86882	1.60622	2.48877e-60	3.95921e-59
XM_011466504.1	105351610	product=uncharacterized LOC105351610	392	19.9637	1227	62.8114	1.79479	1.60323	2.35392e-102	6.03472e-101
XM_004308381.2	101313560	product=probable carboxylesterase 8	382	7.739	86	1.75129	-1.98718	-1.60323	5.31041e-45	6.39585e-44
XM_011469946.1	101312176	product=WAT1-related protein At5g40240-like%2C transcript variant X1	64	1.68556	242	6.40648	2.05352	1.60309	8.86581e-26	6.80358e-25
XM_004304547.2	101312176	product=WAT1-related protein At5g40240-like%2C transcript variant X2	64	1.68918	242	6.42024	2.05352	1.60309	8.86581e-26	6.80358e-25
XM_004290617.2	101293452	product=F-box protein At2g27310-like%2C transcript variant X1	178	2.99141	593	10.0173	1.88158	1.60195	2.66967e-59	4.17446e-58
XM_004301872.2	101299013	product=uncharacterized LOC101299013	2270	63.5526	606	17.0537	-1.75248	-1.60121	2.8323e-220	1.50081e-218
XM_004287877.2	101310254	product=peroxidase 3%2C transcript variant X1	389	11.1446	88	2.53417	-1.98052	-1.60057	2.49216e-43	2.89219e-42
XM_004302964.2	101300833	product=monodehydroascorbate reductase%2C seedling isozyme	4397	97.8424	12499	279.566	1.65809	1.5995	0	0
XM_011463464.1	101294447	product=major allergen Pru ar 1-like	120	2.61038	416	9.09611	1.93612	1.59927	3.37964e-40	3.65843e-39
XM_011462229.1	101313880	product=(S)-scoulerine 9-O-methyltransferase-like%2C transcript variant X1	159	1.79175	30	0.339813	-2.21665	-1.5991	2.30998e-22	1.60249e-21
XM_004291868.2	101310778	product=protein TRANSPARENT TESTA 12	457	8.55348	106	1.99421	-1.94666	-1.59818	3.61238e-52	4.96034e-51
XM_011469948.1	101312176	product=WAT1-related protein At5g40240-like%2C transcript variant X4	63	1.66637	238	6.32771	2.05195	1.59808	3.30862e-26	2.56794e-25
XM_011469947.1	101312176	product=WAT1-related protein At5g40240-like%2C transcript variant X3	63	1.66279	238	6.31412	2.05195	1.59808	3.30862e-26	2.56794e-25
XM_011470697.1	105349310	product=probable LRR receptor-like serine/threonine-protein kinase At3g47570	24	0.374332	0	0	-4.49278	-1.59764	3.8052e-07	1.22592e-06
XM_004290140.2	101313078	product=membrane protein of ER body 2	24	0.497986	0	0	-4.49278	-1.59764	3.8052e-07	1.22592e-06
XM_011470778.1	101295270	product=serine/arginine-rich splicing factor RS41-like%2C transcript variant X3	756	21.7603	2270	65.6763	1.73604	1.59671	3.77377e-178	1.61435e-176
XM_004303958.2	101299788	product=lysine histidine transporter 1-like	747	13.5881	2243	41.0117	1.73604	1.59588	4.66576e-176	1.97573e-174
XM_004300747.2	101310521	product=kinesin-4%2C transcript variant X2	1028	9.84522	261	2.51253	-1.82253	-1.59511	1.54659e-102	3.96845e-101
XM_004295975.2	101305254	product=uncharacterized LOC101305254	33	0.604154	2	0.0368046	-3.35142	-1.5939	1.85524e-08	6.62977e-08
XM_004295579.2	101302920	product=phenylalanine N-monooxygenase-like	1844	34.9032	489	9.30362	-1.76169	-1.5937	1.5248e-180	6.58044e-179
XM_011466445.1	101297732	product=patellin-3-like%2C transcript variant X2	1071	16.5367	3157	48.9973	1.70978	1.59222	4.42987e-241	2.52055e-239
XM_004292750.2	101308841	product=protein IQ-DOMAIN 1	259	4.44796	55	0.94943	-2.06393	-1.59222	1.61781e-32	1.49407e-31
XM_011472004.1	101305890	product=uncharacterized LOC101305890%2C transcript variant X1	16	0.343992	81	1.75046	2.42117	1.59172	4.09516e-12	1.8473e-11
XM_004292379.2	101303484	product=cysteine-rich repeat secretory protein 38-like	117	2.98339	404	10.3549	1.93021	1.58904	6.30748e-39	6.63417e-38
XM_004300789.2	101298226	product=probable membrane-associated kinase regulator 2	570	12.3629	137	2.98678	-1.89774	-1.58858	1.20557e-62	1.988e-61
XM_011468677.1	101314004	product=ATP-dependent zinc metalloprotease FTSH 2%2C chloroplastic%2C transcript variant X1	11400	189.171	31662	528.112	1.62472	1.58816	0	0
XM_004303155.2	101314004	product=ATP-dependent zinc metalloprotease FTSH 2%2C chloroplastic%2C transcript variant X2	11401	185.268	31663	517.19	1.62463	1.58808	0	0
XM_004294562.2	101305049	product=probable aquaporin TIP1-2	219	7.69771	709	25.0497	1.84139	1.5877	2.36173e-62	3.88797e-61
XM_011465625.1	101295341	product=uncharacterized LOC101295341%2C transcript variant X1	61	1.38752	230	5.25868	2.04863	1.58764	8.35625e-12	3.70668e-11
XM_004299768.2	101297732	product=patellin-3-like%2C transcript variant X1	1080	16.3672	3170	48.2891	1.70365	1.5865	1.04758e-240	5.94907e-239
XM_004291550.2	101308344	product=glucan endo-1%2C3-beta-glucosidase 14	1626	36.008	4701	104.643	1.68214	1.5863	0	0
XM_004309614.2	101297977	product=anthocyanidin reductase	37173	986.775	10884	290.415	-1.62087	-1.58441	0	0
XM_004305186.2	101300375	product=protein S-acyltransferase 10-like	37	1.13499	152	4.68674	2.16054	1.58346	2.57994e-18	1.5416e-17
XM_004296313.2	101298592	product=ethylene-responsive transcription factor 1B	198	4.95627	40	1.00644	-2.12799	-1.58335	3.46103e-26	2.68517e-25
XM_004287766.2	101300182	product=naringenin%2C2-oxoglutarate 3-dioxygenase	21073	542.975	6126	158.661	-1.63113	-1.58262	0	0
XM_011463066.1	101295120	product=ethylene-responsive transcription factor RAP2-7-like%2C transcript variant X3	220	4.86609	709	15.7631	1.83485	1.58157	5.01024e-62	8.1928e-61
XM_004288024.2	101306082	product=salicylic acid-binding protein 2-like	48	1.60312	4	0.134284	-3.1417	-1.57927	7.61882e-11	3.19322e-10
XM_004287234.2	101310347	product=probable galactinol--sucrose galactosyltransferase 6	48	0.721206	4	0.0604112	-3.1417	-1.57927	7.61882e-11	3.19322e-10
XR_184082.2	101307857	ncrna_class=lncRNA	72	1.29185	263	4.74325	2.00565	1.57794	2.01104e-27	1.61362e-26
XM_011463383.1	101309809	product=tubulin alpha-3 chain%2C transcript variant X2	1425	37.8546	4111	109.772	1.67894	1.5766	2.17076e-304	1.52542e-302
	101301790		213	5.94975	44	1.23541	-2.09854	-1.57631	1.34487e-27	1.08385e-26
XM_011462878.1	101309866	product=probable pectinesterase/pectinesterase inhibitor 12	657	11.4483	162	2.83747	-1.86214	-1.57625	2.78386e-70	5.07311e-69
XM_011462339.1	101306704	product=probable LRR receptor-like serine/threonine-protein kinase At4g20940%2C transcript variant X2	1572	14.458	418	3.86431	-1.75742	-1.57591	2.4703e-151	8.92568e-150
XM_011465587.1	101310521	product=kinesin-4%2C transcript variant X1	1007	9.69446	259	2.5063	-1.80383	-1.57524	6.04203e-106	1.59936e-104
XM_011462340.1	101306704	product=probable LRR receptor-like serine/threonine-protein kinase At4g20940%2C transcript variant X3	1571	14.4669	418	3.86914	-1.7565	-1.57498	1.34647e-153	4.93811e-152
XM_004302997.2	101311589	product=probable leucine-rich repeat receptor-like protein kinase At1g68400	1578	24.2431	420	6.4859	-1.75604	-1.57494	3.1983e-154	1.17887e-152
XM_011460884.1	101311935	product=DEAD-box ATP-dependent RNA helicase 56%2C transcript variant X1	3338	67.4029	9381	190.406	1.64156	1.57426	0	0
XM_004298248.2	101310214	product=protein ASPARTIC PROTEASE IN GUARD CELL 1	1206	20.1666	315	5.29461	-1.78235	-1.57426	1.39978e-120	4.1516e-119
XM_004303089.2	101315253	product=ribulose bisphosphate carboxylase small chain%2C chloroplastic-like	168359	6406.27	50326	1924.87	-1.59107	-1.57404	0	0
XM_011460766.1	101294145	product=glutamate receptor 2.7-like%2C transcript variant X5	126	1.60146	427	5.45522	1.90386	1.5739	3.101e-40	3.3599e-39
XM_011460765.1	101294145	product=glutamate receptor 2.7-like%2C transcript variant X3	126	1.25427	427	4.27257	1.90386	1.5739	4.44983e-83	9.51082e-82
XM_004303345.2	101300935	product=fasciclin-like arabinogalactan protein 15	3704	68.6985	1033	19.2582	-1.69016	-1.57333	0	0
XM_004293933.2	101306704	product=probable LRR receptor-like serine/threonine-protein kinase At4g20940%2C transcript variant X1	1548	14.9456	412	3.99834	-1.75605	-1.57323	8.58628e-154	3.15689e-152
XM_004307998.2	101305890	product=uncharacterized LOC101305890%2C transcript variant X2	16	0.345402	80	1.73594	2.40347	1.57274	6.89494e-12	3.07102e-11
XM_004307375.2	101308807	product=nuclear transcription factor Y subunit B-1-like%2C transcript variant X1	425	11.0824	1296	33.9694	1.75733	1.5726	1.91361e-90	4.43277e-89
XM_011464845.1	101310254	product=peroxidase 3%2C transcript variant X2	374	8.98372	86	2.07645	-1.95672	-1.57189	1.30085e-45	1.59093e-44
XM_011471386.1	101308807	product=nuclear transcription factor Y subunit B-1-like%2C transcript variant X2	358	10.3693	1103	32.1129	1.77176	1.57105	1.38536e-104	3.62133e-103
XM_011471712.1	101293831	product=histone acetyltransferase GCN5-like%2C transcript variant X6	42	0.777805	167	3.10869	2.11713	1.57101	2.3426e-18	1.40092e-17
XM_011459836.1	101296914	product=transcription factor IBH1-like	247	7.83087	782	24.9206	1.80975	1.56985	8.07578e-67	1.39944e-65
XM_004290211.2	101310276	product=probable sucrose-phosphate synthase 4	1006	9.99001	2925	29.1967	1.68994	1.56845	1.74679e-219	9.20613e-218
XM_011459342.1	101310748	product=protein SRG1-like	270	7.17245	59	1.57541	-2.02418	-1.56642	4.35447e-33	4.06367e-32
XM_004294567.2	101306504	product=11S globulin seed storage protein 2-like	239	5.6964	51	1.22183	-2.05537	-1.56634	5.0246e-30	4.32157e-29
XM_004293149.2	101303589	product=omega-hydroxypalmitate O-feruloyl transferase	346	4.39009	79	1.00754	-1.96579	-1.56534	1.87275e-40	2.04156e-39
XM_004297418.2	101303507	product=HMG-Y-related protein B-like	353	11.8974	81	2.7441	-1.95898	-1.56306	4.56345e-41	5.03285e-40
XM_004297471.2	101295412	product=omega-hydroxypalmitate O-feruloyl transferase-like	617	11.961	1829	35.6398	1.71724	1.56294	1.43568e-141	4.91469e-140
XM_011468910.1	101308013	product=cryptochrome DASH%2C chloroplastic/mitochondrial	81	1.43794	288	5.13911	1.96845	1.56277	4.35019e-29	3.66198e-28
XM_011465520.1	101301205	product=heat stress transcription factor B-2b%2C transcript variant X4	83	1.1161	12	0.162198	-2.5408	-1.56225	2.29474e-14	1.1666e-13
XM_004292721.2	101299835	product=growth-regulating factor 6-like	2033	34.3539	555	9.42693	-1.72008	-1.56172	5.38678e-193	2.51352e-191
XM_011460886.1	101311935	product=DEAD-box ATP-dependent RNA helicase 56%2C transcript variant X3	3665	69.693	10183	194.639	1.6251	1.56077	0	0
XM_004294789.2	101303596	product=2-hydroxyisoflavanone dehydratase-like	122	2.9478	22	0.534319	-2.26787	-1.56023	4.92697e-18	2.91726e-17
XM_011462410.1	101314551	product=cytochrome P450 CYP749A22-like%2C transcript variant X2	292	6.38584	906	19.916	1.78128	1.55966	2.84801e-75	5.53784e-74
XM_004296843.2	101300045	product=major allergen Pru ar 1-like	20	0.945428	93	4.41896	2.31335	1.55951	6.26358e-13	2.9613e-12
XM_004305138.2	101309180	product=ultraviolet-B receptor UVR8-like%2C transcript variant X3	258	5.61564	808	17.6779	1.79427	1.55909	4.30955e-68	7.64423e-67
NM_001280049.1	101302898	product=transcription factor MYB28-like	1835	72.7522	499	19.8861	-1.72549	-1.55869	4.15689e-175	1.75265e-173
XM_011460885.1	101311935	product=DEAD-box ATP-dependent RNA helicase 56%2C transcript variant X2	3061	68.1136	8525	190.68	1.62847	1.55813	0	0
XM_004299970.2	101312156	product=protein NRT1/ PTR FAMILY 4.3-like	363	4.93526	84	1.14795	-1.94733	-1.55787	6.95496e-42	7.79951e-41
XM_004301976.2	101295824	product=DNA-damage-repair/toleration protein DRT102	218	6.04818	46	1.28282	-2.06912	-1.55646	9.12013e-28	7.39682e-27
XM_004288527.2	101293234	product=probable polyamine oxidase 4	466	8.37339	1397	25.232	1.73295	1.55601	3.51037e-110	9.60451e-109
XM_011464743.1	101297343	product=protein argonaute 7	396	3.55346	93	0.83884	-1.92733	-1.55577	5.78997e-45	6.97057e-44
XM_004309907.2	101291489	product=probable alpha%2Calpha-trehalose-phosphate synthase [UDP-forming] 11	52	0.563423	197	2.14554	2.05251	1.55559	1.13312e-21	7.68961e-21
XM_011468127.1	101302856	product=wound-induced protein 1	210	9.47742	44	1.99601	-2.07817	-1.55515	5.98577e-27	4.73928e-26
XM_004288324.2	101299523	product=chitinase 10	237	3.07048	51	0.664152	-2.0433	-1.55382	1.34554e-29	1.14584e-28
XM_011472576.1	101314621	product=uncharacterized LOC101314621	567	4.40317	140	1.09282	-1.85912	-1.55225	7.87483e-61	1.26165e-59
XM_004301355.2	101298326	product=F-box protein At5g07610-like	96	2.62005	16	0.438932	-2.36137	-1.54797	3.36391e-15	1.77641e-14
XM_004293904.2	101297328	product=abscisic acid receptor PYL12-like	218	7.5333	687	23.863	1.80256	1.54739	1.32906e-58	2.04545e-57
XM_011471711.1	101293831	product=histone acetyltransferase GCN5-like%2C transcript variant X5	40	0.907611	158	3.60359	2.10641	1.5472	3.70274e-19	2.29536e-18
XM_004305221.2	101311404	product=ankyrin repeat-containing protein At3g12360-like	32	0.545742	2	0.0342852	-3.30835	-1.5463	3.38355e-08	1.18556e-07
XM_004295607.2	101314551	product=cytochrome P450 CYP749A22-like%2C transcript variant X1	302	6.29822	926	19.4116	1.76433	1.546	8.7423e-76	1.7147e-74
XM_011464134.1	101313788	product=uncharacterized protein At5g39865	360	5.62926	84	1.32028	-1.93539	-1.54557	2.91361e-41	3.22544e-40
XM_004300443.2	101311193	product=luminal-binding protein	4875	75.052	13324	206.187	1.60144	1.5455	0	0
XM_004308494.2	101306094	product=receptor-like protein 12	60	0.690912	6	0.0694484	-2.9723	-1.54499	1.74031e-12	8.02966e-12
XM_004309502.2	101307951	product=oligopeptide transporter 7	557	7.67184	138	1.91057	-1.8541	-1.54498	1.32755e-59	2.08809e-58
XM_004294488.2	101305346	product=transmembrane protein 184C-like	251	6.72587	780	21.0091	1.78298	1.54436	3.48382e-65	5.93525e-64
XM_011465519.1	101301205	product=heat stress transcription factor B-2b%2C transcript variant X3	82	1.11362	12	0.163811	-2.52352	-1.54366	3.97434e-14	1.9923e-13
XM_004300716.2	101301205	product=heat stress transcription factor B-2b%2C transcript variant X2	82	1.11239	12	0.16363	-2.52352	-1.54366	3.97434e-14	1.9923e-13
XM_004295724.2	101307975	product=mitogen-activated protein kinase kinase kinase ANP1-like	75	1.8685	266	6.66119	1.96385	1.54279	6.33087e-27	5.00846e-26
XM_011464548.1	101307979	product=eukaryotic peptide chain release factor subunit 1-3	7077	128.987	19175	351.295	1.58897	1.54245	0	0
XM_004300031.2	101307793	product=uncharacterized LOC101307793	396	10.5424	94	2.51542	-1.91206	-1.54196	1.49784e-44	1.78856e-43
XM_011468230.1	101309180	product=ultraviolet-B receptor UVR8-like%2C transcript variant X2	266	5.46095	821	16.9422	1.77338	1.54124	4.73553e-68	8.39475e-67
XM_011465644.1	101301977	product=ABC transporter C family member 10-like%2C transcript variant X2	645	4.79481	163	1.21797	-1.82676	-1.54094	1.78752e-67	3.14781e-66
XM_011471710.1	101293831	product=histone acetyltransferase GCN5-like%2C transcript variant X4	44	0.796443	170	3.09307	2.07708	1.54079	2.0079e-19	1.25802e-18
XM_004302324.2	101303718	product=uncharacterized LOC101303718	547	10.751	1607	31.7479	1.7041	1.54015	3.5602e-123	1.08108e-121
XM_004296876.2	101310110	product=uncharacterized LOC101310110	222	8.73587	695	27.4902	1.79312	1.53999	8.4443e-59	1.30646e-57
XM_011471709.1	101293831	product=histone acetyltransferase GCN5-like%2C transcript variant X3	45	0.765679	173	2.95883	2.07046	1.53947	1.7626e-19	1.10682e-18
XM_011471708.1	101293831	product=histone acetyltransferase GCN5-like%2C transcript variant X2	45	0.764268	173	2.95337	2.07046	1.53947	2.96207e-19	1.84362e-18
XM_011469222.1	101310719	product=uncharacterized LOC101310719%2C transcript variant X1	284	4.40351	64	0.997471	-1.98137	-1.5394	4.91824e-33	4.58248e-32
XM_004305889.1	101300556	product=abscisate beta-glucosyltransferase-like	112	2.74212	20	0.492195	-2.27678	-1.53885	8.78902e-17	4.98538e-16
XM_004287916.2	101298061	product=linolenate hydroperoxide lyase%2C chloroplastic	3237	57.2714	920	16.3615	-1.66275	-1.53876	4.18471e-293	2.81249e-291
XM_004305299.2	101314203	product=probable purple acid phosphatase 20	179	3.56566	571	11.433	1.8191	1.53864	1.02818e-49	1.34804e-48
XM_011468229.1	101309180	product=ultraviolet-B receptor UVR8-like%2C transcript variant X1	268	5.49284	825	16.9963	1.76961	1.53824	5.99961e-68	1.06292e-66
XM_011472263.1	105353260	product=protein BPS1%2C chloroplastic-like	159	6.16467	513	19.9926	1.83477	1.53812	1.95655e-45	2.38489e-44
XM_004294009.2	101306309	product=serine carboxypeptidase-like 51	154	2.95434	498	9.60303	1.83785	1.53664	2.84314e-44	3.37435e-43
XM_011469818.1	101293026	product=OTU domain-containing protein 5%2C transcript variant X2	291	6.26001	889	19.2231	1.75892	1.53647	1.67834e-72	3.14251e-71
XM_004287390.2	101307528	product=uncharacterized LOC101307528	1	0.0495587	19	0.946483	3.47301	1.53631	1.26958e-05	3.50603e-05
XR_905764.1	101298115	ncrna_class=lncRNA	1378	10.7533	374	2.93361	-1.72758	-1.53544	4.17876e-131	1.32522e-129
XM_004300489.2	101300540	product=HMG1/2-like protein%2C transcript variant X2	2090	89.3989	5788	248.859	1.6202	1.5351	0	0
XR_183789.2	101296038	product=putative laccase-9	11141	191.42	3308	57.1305	-1.60046	-1.53439	0	0
XM_011469224.1	101310719	product=uncharacterized LOC101310719%2C transcript variant X3	283	4.41026	64	1.00253	-1.9763	-1.53416	1.15819e-33	1.09479e-32
XM_004288388.2	101298363	product=uncharacterized LOC101298363	25744	388.39	7770	117.829	-1.57704	-1.53376	0	0
XM_004287226.2	101307823	product=heptahelical transmembrane protein 1%2C transcript variant X2	1252	27.6593	338	7.50572	-1.73495	-1.53316	5.07301e-123	1.53727e-121
XM_011471641.1	105353074	product=ferritin-4%2C chloroplastic	1986	63.5101	5498	176.729	1.61966	1.53237	0	0
XM_004292814.2	101307280	product=cytochrome P450 71A1-like	114	5.82184	380	19.5065	1.87924	1.53216	2.32694e-35	2.28048e-34
XM_011463357.1	105350649	product=ankyrin repeat-containing protein At5g02620-like%2C transcript variant X2	136	2.48368	26	0.477276	-2.19207	-1.53189	3.42646e-19	2.12746e-18
XM_011463354.1	105350649	product=ankyrin repeat-containing protein At5g02620-like%2C transcript variant X1	136	2.33997	26	0.449659	-2.19207	-1.53189	3.42646e-19	2.12746e-18
XM_011462840.1	101298168	product=uncharacterized LOC101298168	23	0.502398	0	0	-4.43388	-1.53183	6.71998e-07	2.10819e-06
XM_011459535.1	101308931	product=cyclin-D1-1-like%2C transcript variant X2	23	0.654359	0	0	-4.43388	-1.53183	7.05123e-08	2.41438e-07
XM_011466394.1	101304188	product=disease resistance protein At4g27190-like%2C transcript variant X2	222	1.32409	48	0.287769	-2.03511	-1.53123	9.96233e-28	8.06649e-27
XM_004297240.2	101301100	product=NAC transcription factor 29-like	314	10.1737	950	30.9395	1.74517	1.53059	2.03841e-76	4.02232e-75
XM_011469819.1	101293026	product=OTU domain-containing protein 5%2C transcript variant X3	293	6.08985	891	18.6147	1.75231	1.53047	3.02045e-72	5.61958e-71
XM_004307294.2	101306672	product=uncharacterized LOC101306672	132	2.17377	432	7.15092	1.85402	1.52993	3.68378e-39	3.89696e-38
XM_011467109.1	101300540	product=HMG1/2-like protein%2C transcript variant X1	2189	85.8639	6032	237.829	1.61302	1.5298	0	0
XM_004292196.2	101313094	product=leucine-rich repeat receptor-like protein kinase PXL2	334	2.4759	78	0.581194	-1.93316	-1.52926	2.22397e-38	2.31014e-37
XR_184528.2	101298115	ncrna_class=lncRNA	1372	10.9332	374	2.99574	-1.72129	-1.52905	7.64842e-129	2.39446e-127
XM_011469566.1	101309950	product=collagen alpha-2(IV) chain-like%2C transcript variant X2	3607	108.303	9803	295.864	1.59325	1.52821	0	0
XM_004300800.2	101301977	product=ABC transporter C family member 10-like%2C transcript variant X1	650	4.73742	166	1.21612	-1.81173	-1.52809	2.61044e-67	4.57498e-66
XM_004287100.2	101294875	product=DNA-directed RNA polymerase 3%2C chloroplastic	383	3.69779	1140	11.0634	1.7222	1.52713	1.9103e-89	4.36983e-88
XR_907037.1	101302572	product=putative F-box/FBD/LRR-repeat protein At4g03220%2C transcript variant X3	53	0.831928	5	0.0788895	-3.01885	-1.52654	2.0844e-11	9.0501e-11
XR_905765.1	101298115	ncrna_class=lncRNA	1349	10.6669	368	2.92492	-1.72019	-1.5264	2.88641e-132	9.25388e-131
XM_011461414.1	101311247	product=protein EXORDIUM-like 5	1069	27.5828	3010	78.0668	1.64371	1.5253	4.15717e-216	2.15988e-214
XM_011463662.1	105350753	product=putative UDP-rhamnose	NA	1422	NA	1422	-1.8612	-1.52528	NA	NA
XM_004294590.2	101313587	product=laccase-17-like	546	7.42602	137	1.87294	-1.83579	-1.52513	8.79428e-58	1.33315e-56
XM_011466134.1	101309446	product=uncharacterized LOC101309446%2C transcript variant X3	335	6.64802	1005	20.0471	1.73318	1.52507	9.76057e-80	2.0015e-78
XM_011465521.1	101301205	product=heat stress transcription factor B-2b%2C transcript variant X5	81	1.11441	12	0.165951	-2.50603	-1.52483	4.76929e-16	2.63018e-15
XM_004287225.2	101307823	product=heptahelical transmembrane protein 1%2C transcript variant X1	1285	27.6753	350	7.57699	-1.72227	-1.52369	5.16474e-121	1.53803e-119
XM_004300000.2	101297839	product=serine/threonine-protein kinase BRI1-like 2	605	5.67906	154	1.45305	-1.81597	-1.52193	5.66149e-63	9.3781e-62
XM_004302599.2	101313034	product=UPF0503 protein At3g09070%2C chloroplastic	376	5.48191	90	1.31894	-1.89955	-1.5213	4.39841e-42	4.94577e-41
XM_011459533.1	101307458	product=serine carboxypeptidase-like 7	908	18.9578	241	5.05776	-1.75819	-1.52056	7.96767e-90	1.82975e-88
XM_011460412.1	105349785	product=desiccation-related protein PCC13-62-like	2176	94.3915	615	26.8157	-1.67026	-1.5191	6.18518e-199	2.97122e-197
XM_004300671.2	101311194	product=3%2C9-dihydroxypterocarpan 6A-monooxygenase-like%2C transcript variant X2	65	0.629706	7	0.068165	-2.89332	-1.51855	4.58211e-13	2.18041e-12
XM_011469223.1	101310719	product=uncharacterized LOC101310719%2C transcript variant X2	280	4.92561	64	1.13167	-1.96098	-1.51831	7.14359e-34	6.79417e-33
XM_004291277.2	101296451	product=24-methylenesterol C-methyltransferase 2	3024	77.6462	8195	211.508	1.58906	1.51803	0	0
XM_004299406.2	101309446	product=uncharacterized LOC101309446%2C transcript variant X1	339	6.54767	1011	19.6281	1.72468	1.51762	7.10659e-80	1.45932e-78
XM_004309096.2	101293646	product=uncharacterized protein At4g00950	429	18.8984	105	4.64939	-1.86919	-1.51702	7.85078e-47	9.85653e-46
XM_004298631.2	101295622	product=protein ODORANT1	216	5.6126	47	1.22757	-2.02551	-1.51627	6.8359e-27	5.40217e-26
XM_004303418.2	101301025	product=transcription factor MYB114-like	231	8.35035	51	1.85311	-2.00646	-1.5156	2.54211e-28	2.09658e-27
XM_004310002.2	101300690	product=uncharacterized LOC101300690	672	8.6575	174	2.25326	-1.79217	-1.5145	1.30257e-68	2.3175e-67
XM_004299770.2	101298317	product=anthocyanidin 5%2C3-O-glucosyltransferase-like	1014	18.9594	273	5.13083	-1.73815	-1.51419	1.17844e-98	2.9464e-97
XM_011466133.1	101309446	product=uncharacterized LOC101309446%2C transcript variant X2	341	6.01303	1014	17.9728	1.72049	1.51394	1.14021e-79	2.3332e-78
XM_004303889.2	101304490	product=UPF0481 protein At3g47200-like	570	11.4409	145	2.92544	-1.81644	-1.51372	1.7993e-59	2.82102e-58
XM_004306473.2	101292154	product=sm-like protein LSM7	624	30.5145	1787	87.8386	1.6675	1.51333	3.66688e-132	1.17304e-130
XM_004299210.2	101299584	product=enolase 1%2C chloroplastic	538	8.73106	136	2.21852	-1.82503	-1.513	1.4386e-56	2.13878e-55
XM_004307471.2	101313554	product=very-long-chain enoyl-CoA reductase	4598	112.648	1351	33.2699	-1.61515	-1.51223	0	0
XM_004299639.2	101307208	product=transcription factor bHLH96	234	5.75198	52	1.28483	-1.99752	-1.51076	1.60675e-28	1.33303e-27
XM_004303349.2	101301988	product=polyphenol oxidase%2C chloroplastic-like	3020	33.5601	8142	90.9467	1.58161	1.51048	0	0
XM_004293264.2	101300421	product=probable WRKY transcription factor 31	510	8.20443	1473	23.8188	1.67942	1.50931	1.52033e-110	4.18311e-109
XM_004309445.2	101315397	product=probable aquaporin NIP5-1%2C transcript variant X1	568	7.95409	145	2.04103	-1.81138	-1.50854	4.51023e-59	7.02249e-58
XM_011468866.1	101295551	product=uncharacterized LOC101295551	232	4.46929	708	13.7096	1.75653	1.50794	4.87647e-58	7.43084e-57
XM_004294856.2	101299563	product=uridine kinase-like protein 3%2C transcript variant X1	632	12.1813	1802	34.9118	1.6612	1.50791	1.83691e-132	5.89561e-131
XM_011466393.1	101304188	product=disease resistance protein At4g27190-like%2C transcript variant X1	226	1.48591	50	0.330441	-2.00304	-1.50747	1.06591e-27	8.61995e-27
XM_004299711.2	101304188	product=disease resistance protein At4g27190-like%2C transcript variant X3	226	1.4883	50	0.330972	-2.00304	-1.50747	1.06591e-27	8.61995e-27
XM_011468259.1	101314398	product=transcriptional activator Myb	216	3.15792	663	9.74318	1.76457	1.50734	7.48025e-55	1.0682e-53
XM_004294910.2	101292287	product=late embryogenesis abundant protein 1-like	149	6.53256	474	20.8888	1.81404	1.50729	1.94947e-41	2.16795e-40
XM_004305951.2	101299609	product=uncharacterized LOC101299609	80	0.707031	12	0.106603	-2.48833	-1.50575	1.18809e-13	5.82476e-13
XM_004299153.2	101306915	product=respiratory burst oxidase homolog protein D	1541	15.6786	4222	43.178	1.60454	1.5054	9.87301e-291	6.5752e-289
XM_011463293.1	101299563	product=uridine kinase-like protein 3%2C transcript variant X2	634	10.8125	1802	30.8909	1.65665	1.50353	6.84672e-132	2.17839e-130
XM_004299875.2	101306047	product=L-ascorbate oxidase-like	1519	27.2545	425	7.66495	-1.68407	-1.50298	5.1972e-141	1.77085e-139
XM_011469430.1	101305962	product=UDP-glucose flavonoid 3-O-glucosyltransferase 7-like	306	5.87642	72	1.38984	-1.92119	-1.50124	4.41412e-35	4.30009e-34
	101292527		93	0.964304	16	0.166759	-2.31605	-1.49985	1.65544e-14	8.47917e-14
XM_004301341.2	101293690	product=microtubule-associated protein TORTIFOLIA1	141	1.57543	28	0.314468	-2.14069	-1.49981	2.44563e-19	1.52542e-18
XM_004293258.2	101298202	product=peroxisomal membrane protein PMP22-like	308	11.3112	913	33.7031	1.71567	1.49844	1.24457e-71	2.30675e-70
XM_011468247.1	101294772	product=uncharacterized LOC101294772	1424	43.6453	398	12.2617	-1.68542	-1.49842	1.82138e-132	5.85217e-131
XM_004289992.2	101293535	product=expansin-like A2	150	2.74479	474	8.71837	1.80446	1.49842	4.08459e-41	4.50813e-40
XM_004299448.2	101297057	product=zinc-finger homeodomain protein 10-like	529	18.8638	135	4.83889	-1.81131	-1.49782	3.70501e-55	5.34818e-54
XM_004290407.2	101300687	product=uncharacterized oxidoreductase At4g09670	2665	62.3101	773	18.1669	-1.63319	-1.49775	2.69715e-236	1.50829e-234
XM_011459536.1	105349584	product=zinc finger BED domain-containing protein DAYSLEEPER-like	76	0.913082	261	3.15192	1.91771	1.49754	1.34482e-25	1.02677e-24
XM_004288259.2	101304515	product=phosphoenolpyruvate carboxykinase [ATP]-like	1453	22.8853	407	6.44355	-1.68231	-1.4973	8.33769e-135	2.71768e-133
XM_011459165.1	105349457	product=uncharacterized LOC105349457	31	0.917353	2	0.05949	-3.26396	-1.49709	6.17369e-08	2.12196e-07
XM_004309525.2	101291008	product=protein IQ-DOMAIN 1-like	31	0.681181	2	0.0441744	-3.26396	-1.49709	6.17369e-08	2.12196e-07
XM_004307733.2	101295660	product=putative lipase YOR059C	362	8.18868	1059	24.0791	1.6971	1.49608	2.23294e-81	4.67371e-80
XM_011466404.1	101298029	product=F-box protein At5g07610-like	341	6.06817	82	1.46675	-1.89173	-1.49605	3.57411e-38	3.69165e-37
XM_004306404.2	101296030	product=uncharacterized LOC101296030%2C transcript variant X4	21885	418.319	6775	130.169	-1.54042	-1.49394	0	0
XM_004301121.2	101290773	product=(-)-isopiperitenol/(-)-carveol dehydrogenase%2C mitochondrial-like	209	7.29062	46	1.61293	-2.00858	-1.49352	7.64142e-26	5.87399e-25
XM_004294277.2	101291505	product=scarecrow-like protein 21	869	12.4967	2414	34.8941	1.62401	1.49258	1.85086e-170	7.6604e-169
XM_004294456.2	101296357	product=putative E3 ubiquitin-protein ligase XBAT31	544	9.52431	1546	27.2072	1.65622	1.49108	2.04875e-113	5.80604e-112
XM_011461042.1	101311440	product=uncharacterized LOC101311440	4505	105.868	1343	31.7238	-1.59424	-1.49084	0	0
XM_004293301.2	101310868	product=uncharacterized LOC101310868	222	7.90107	671	24.0046	1.7425	1.48816	1.8998e-54	2.69196e-53
XM_004287441.2	101300560	product=glucan endo-1%2C3-beta-glucosidase 13	701	12.5228	186	3.33991	-1.75735	-1.48777	8.47549e-70	1.53591e-68
XM_004291037.2	101298190	product=ethylene-responsive transcription factor RAP2-1-like	1369	27.9034	3720	76.2143	1.59259	1.48733	2.31587e-253	1.36269e-251
XM_004294372.2	101295023	product=prohibitin-1%2C mitochondrial-like%2C transcript variant X1	32	1.01105	127	4.03334	2.10668	1.48656	4.06882e-15	2.14209e-14
XM_004296535.2	101299572	product=beta-amyrin 28-oxidase-like	573	10.9469	1618	31.0709	1.64706	1.48595	1.45422e-117	4.24857e-116
XM_004303710.2	101294778	product=pectinesterase-like	5574	103.071	1680	31.226	-1.57857	-1.48591	0	0
XM_004296838.2	101298594	product=major allergen Pru av 1-like	842	39.1994	2331	109.081	1.61904	1.48547	7.18622e-164	2.82276e-162
XM_004306494.2	101298162	product=polyketide synthase 1	55162	1327.62	17391	420.725	-1.5142	-1.48508	0	0
XM_011459848.1	101305024	product=lysozyme D-like	230	10.6272	52	2.41509	-1.97275	-1.48504	1.11877e-27	9.03865e-27
XM_011470777.1	101295270	product=serine/arginine-rich splicing factor RS41-like%2C transcript variant X2	820	14.6132	2272	40.6986	1.62022	1.4849	5.78322e-160	2.20658e-158
XM_004291301.2	101303297	product=receptor protein kinase CLAVATA1	1487	12.9925	421	3.69745	-1.66698	-1.48479	2.47371e-136	8.14461e-135
XM_004298673.2	101308573	product=PGR5-like protein 1A%2C chloroplastic	2088	58.7247	5583	157.833	1.56956	1.48401	0	0
XM_004297591.2	101310311	product=U-box domain-containing protein 19	304	4.1561	893	12.2716	1.70254	1.48364	2.75877e-69	4.95952e-68
XM_004293531.2	101305728	product=chlorophyll a-b binding protein of LHCII type 1	13015	467.269	33570	1211.47	1.51801	1.48344	0	0
XM_011464206.1	101293777	product=uncharacterized aarF domain-containing protein kinase At1g71810%2C chloroplastic	885	12.1216	2438	33.5653	1.61199	1.48158	4.2529e-170	1.75032e-168
XM_004296741.2	101293187	product=sodium/hydrogen exchanger 2-like	510	7.13375	1445	20.3168	1.65175	1.48119	1.07581e-105	2.84261e-104
XM_004294189.2	101313585	product=lysosomal beta glucosidase-like	1539	25.5726	438	7.31558	-1.65956	-1.48077	3.11774e-140	1.05496e-138
XM_004303143.2	101310041	product=phospholipase A1-IIdelta	1108	21.9762	308	6.1405	-1.6925	-1.48058	4.17483e-104	1.08453e-102
XM_004308632.2	101308524	product=DNA topoisomerase 2	947	7.10282	260	1.96017	-1.70976	-1.47986	2.00022e-90	4.62974e-89
XM_004295716.2	101305056	product=putative serine/threonine-protein kinase-like protein CCR3	45	0.645362	4	0.057662	-3.05056	-1.47927	4.47121e-10	1.78623e-09
XM_004303248.2	101293902	product=protein TOO MANY MOUTHS	69	1.1773	8	0.137204	-2.80828	-1.47814	2.09811e-13	1.01471e-12
XM_004295926.2	101310305	product=probable LRR receptor-like serine/threonine-protein kinase At3g47570	147	1.44229	459	4.52677	1.78712	1.47755	2.59022e-39	2.75303e-38
XM_011465693.1	101291723	product=GDSL esterase/lipase At4g10955-like%2C transcript variant X2	435	9.69135	110	2.46335	-1.82269	-1.47702	4.45665e-46	5.49866e-45
XM_004287358.2	101298057	product=probable chlorophyll(ide) b reductase NYC1%2C chloroplastic	615	11.094	1718	31.1512	1.63165	1.47583	7.45326e-123	2.25623e-121
XM_004295043.2	101310879	product=jacalin-related lectin 3-like	154	4.26935	32	0.891724	-2.08065	-1.47486	2.5818e-20	1.67711e-19
XM_004296038.2	101304267	product=probable carboxylesterase 5	538	17.7116	140	4.63279	-1.78351	-1.47479	4.97737e-55	7.15311e-54
XM_004293173.2	101310867	product=anthocyanidin 3-O-glucosyltransferase 5-like	60	1.01389	210	3.56695	1.94144	1.47227	2.57624e-21	1.72829e-20
XM_004298861.2	101291723	product=GDSL esterase/lipase At4g10955-like%2C transcript variant X1	437	9.58532	111	2.4473	-1.81635	-1.472	2.88763e-45	3.50378e-44
XM_004298996.2	101306914	product=probable leucine-rich repeat receptor-like protein kinase At1g68400	314	5.11157	76	1.24359	-1.88134	-1.47074	4.36549e-35	4.25413e-34
XM_004304070.2	101311207	product=uncharacterized LOC101311207	703	45.9589	189	12.4198	-1.7385	-1.47059	4.47196e-69	8.02461e-68
XM_011469414.1	105349248	product=uncharacterized LOC105349248	111	3.40213	21	0.646973	-2.19684	-1.47045	4.67898e-16	2.58305e-15
XM_004294784.2	101302144	product=probable carboxylesterase 12	17	0.485154	78	2.23751	2.28493	1.47033	5.60479e-11	2.36926e-10
XR_908164.1	105353174	ncrna_class=lncRNA	495	14.7071	128	3.8227	-1.79189	-1.46974	4.29392e-50	5.68827e-49
XM_004289318.2	101298840	product=growth-regulating factor 1-like	370	6.46872	92	1.61675	-1.84504	-1.46911	4.66073e-40	5.03218e-39
XM_004306403.2	101296030	product=uncharacterized LOC101296030%2C transcript variant X1	21351	437.603	6726	138.566	-1.51526	-1.46851	0	0
XM_004305565.2	101311212	product=transcription repressor MYB6-like	74	2.30254	9	0.281486	-2.75581	-1.46719	5.33572e-14	2.66087e-13
XM_004303654.2	101302672	product=linoleate 13S-lipoxygenase 3-1%2C chloroplastic-like	1983	23.2263	579	6.81673	-1.62321	-1.46689	4.72847e-175	1.99078e-173
XM_011465192.1	101307780	product=transcription factor bHLH111%2C transcript variant X3	78	1.36562	12	0.211181	-2.45226	-1.46682	3.53478e-13	1.69248e-12
XM_011465191.1	101307780	product=transcription factor bHLH111%2C transcript variant X2	78	1.36627	12	0.211281	-2.45226	-1.46682	3.53478e-13	1.69248e-12
XM_011465190.1	101307780	product=transcription factor bHLH111%2C transcript variant X1	78	1.36432	12	0.210981	-2.45226	-1.46682	3.53478e-13	1.69248e-12
XM_004297741.2	101307780	product=transcription factor bHLH111%2C transcript variant X4	78	1.36757	12	0.211482	-2.45226	-1.46682	3.53478e-13	1.69248e-12
XM_004293123.2	101294919	product=probable carboxylesterase 18	78	1.4651	12	0.226565	-2.45226	-1.46682	3.53478e-13	1.69248e-12
XM_004293320.2	101291499	product=probable xyloglucan endotransglucosylase/hydrolase protein 23	18	0.616813	81	2.79	2.2607	1.46606	3.43933e-11	1.47321e-10
XM_011468372.1	101309362	product=ethylene-responsive transcription factor TINY	442	6.85913	113	1.76264	-1.80719	-1.46553	2.65889e-46	3.30002e-45
XM_011471902.1	101311142	product=zingipain-2-like%2C transcript variant X2	76	1.05071	11	0.152863	-2.53075	-1.4654	2.83929e-13	1.36774e-12
XM_004299716.2	101305665	product=uncharacterized LOC101305665	3758	90.9808	9769	237.729	1.52909	1.46496	0	0
XM_011466448.1	105351593	product=protein NRT1/ PTR FAMILY 5.10-like	379	7.02936	1082	20.1717	1.66204	1.46484	1.90235e-80	3.94792e-79
XM_004294613.2	101296643	product=D-xylose-proton symporter-like 3%2C chloroplastic	454	7.40369	1281	20.9981	1.64554	1.46481	2.19971e-93	5.24476e-92
XM_011465583.1	101304965	product=uncharacterized protein At2g38710%2C transcript variant X3	244	9.08757	720	26.9544	1.7083	1.46464	1.514e-56	2.24974e-55
XM_011465695.1	101291723	product=GDSL esterase/lipase At4g10955-like%2C transcript variant X4	431	9.86449	110	2.53063	-1.80939	-1.46334	3.04642e-44	3.61121e-43
XM_004296134.1	101312621	product=receptor-like protein 2	68	1.13554	232	3.89423	1.90674	1.46322	8.85494e-23	6.23291e-22
XM_011469361.1	105352369	product=protein TIFY 5B	22	0.996532	0	0	-4.37248	-1.46292	1.19102e-06	3.64974e-06
XM_011467880.1	101313913		NA	2105	NA	2105	-4.37248	-1.46292	NA	NA
XM_011461426.1	105350066	product=NAC domain-containing protein 7-like	22	0.620166	0	0	-4.37248	-1.46292	1.19102e-06	3.64974e-06
	101292875		1734	27.7137	504	8.09683	-1.6295	-1.46222	4.11853e-154	1.51615e-152
XM_004299844.2	101296667	product=transcription repressor MYB6	229	4.65213	678	13.8448	1.71286	1.46163	1.39553e-53	1.94822e-52
XM_004291020.2	101293159	product=cyclin-D3-3-like	2484	52.8501	738	15.783	-1.59852	-1.45954	1.86602e-214	9.64376e-213
XM_004292534.2	101308840	product=putative GPI-anchored protein PB15E9.01c	118	2.15176	23	0.421579	-2.15878	-1.45933	1.21001e-16	6.82654e-16
XM_004289822.2	101313942	product=ubiquitin-conjugating enzyme E2 28-like	39	1.46138	146	5.49908	2.02882	1.45896	2.72703e-16	1.51805e-15
XM_004290732.2	101303871	product=thiamine pyrophosphokinase 1%2C transcript variant X1	197	6.12455	590	18.4374	1.72874	1.45877	1.59999e-46	1.99254e-45
XM_004298749.2	101304965	product=uncharacterized protein At2g38710%2C transcript variant X4	254	9.21792	744	27.1401	1.69782	1.45866	8.11368e-58	1.23189e-56
XM_011471914.1	105353149	product=cyclic nucleotide-gated ion channel 1-like	467	7.33351	121	1.90994	-1.78855	-1.45745	3.33827e-48	4.27167e-47
XM_004289767.2	101295470	product=leucine-rich repeat extensin-like protein 1	872	19.2643	2363	52.4734	1.58825	1.45658	4.76275e-161	1.82913e-159
XM_011465694.1	101291723	product=GDSL esterase/lipase At4g10955-like%2C transcript variant X3	422	10.6138	108	2.73037	-1.80525	-1.45602	4.5749e-46	5.63981e-45
XM_004293310.2	101313484	product=acyl-CoA--sterol O-acyltransferase 1-like	106	2.08894	20	0.396176	-2.19807	-1.4557	1.98671e-15	1.06234e-14
XR_908165.1	105353174	ncrna_class=lncRNA	490	14.6649	128	3.85063	-1.77727	-1.45474	4.39428e-51	5.91482e-50
XM_004288163.2	101299327	product=xyloglucan galactosyltransferase KATAMARI1-like	578	9.93559	154	2.66088	-1.75022	-1.4546	1.23144e-57	1.85814e-56
XM_011467942.1	101296876	product=2-aminoethanethiol dioxygenase-like	418	9.60272	107	2.47082	-1.80484	-1.45403	7.8643e-44	9.20686e-43
XM_004298576.2	101294940	product=inactive leucine-rich repeat receptor-like serine/threonine-protein kinase At1g60630	387	3.88916	98	0.989944	-1.81948	-1.454	4.0174e-41	4.43564e-40
XM_011467431.1	101312642	product=licodione synthase-like	261	4.98627	62	1.1906	-1.90506	-1.4537	6.29405e-30	5.39914e-29
XM_004309441.2	101314239	product=glutamyl-tRNA(Gln) amidotransferase subunit A%2C mitochondrial-like	196	3.20197	44	0.722526	-1.97912	-1.45205	5.80542e-24	4.23807e-23
XR_904420.1	105349850	ncrna_class=lncRNA	0	0	18	1.46298	4.39901	1.45132	1.06182e-05	2.95864e-05
XM_011459026.1	101293839	product=vicilin-like antimicrobial peptides 2-2%2C transcript variant X2	1	0.0270717	18	0.48981	3.39901	1.45132	2.35854e-05	6.32751e-05
XM_004309853.2	101293839	product=vicilin-like antimicrobial peptides 2-2%2C transcript variant X1	1	0.0255521	18	0.462315	3.39901	1.45132	2.35854e-05	6.32751e-05
XM_004307880.2	101292061	product=homeobox-leucine zipper protein ATHB-12-like	486	14.7003	1353	41.1364	1.62631	1.45122	1.0543e-96	2.61373e-95
XR_905882.1	101292018	product=cytochrome P450 87A3-like%2C transcript variant X2	90	1.92486	16	0.343965	-2.26925	-1.45006	8.05518e-14	3.98045e-13
XM_004304180.2	101294681	product=serine carboxypeptidase-like 25	278	5.4523	67	1.32084	-1.88558	-1.4498	2.25079e-31	2.01635e-30
XM_004287841.2	101298252	product=ATPase family AAA domain-containing protein 3-A	422	6.65804	1183	18.7611	1.63602	1.44849	1.29187e-85	2.82716e-84
XM_004306189.2	101307916	product=uncharacterized LOC101307916	632	11.4906	171	3.12507	-1.72872	-1.44724	6.93722e-62	1.13123e-60
XM_011461987.1	105350292	product=probable trehalose-phosphate phosphatase C%2C transcript variant X1	166	4.23285	36	0.922712	-2.02317	-1.44671	7.00906e-21	4.63731e-20
XM_004305766.2	101308601	product=ABC transporter C family member 8-like	952	7.86332	268	2.22507	-1.67379	-1.4466	1.59557e-88	3.6188e-87
XM_004296720.2	101311466	product=uncharacterized LOC101311466	494	16.2485	130	4.29803	-1.76678	-1.44637	3.97348e-50	5.26616e-49
XM_011469989.1	101302476	product=titin%2C transcript variant X2	981	2.73899	277	0.777393	-1.66956	-1.44593	7.23685e-91	1.68236e-89
XM_011469988.1	101302476	product=titin%2C transcript variant X1	981	2.73713	277	0.776864	-1.66956	-1.44593	7.23685e-91	1.68236e-89
XM_011465456.1	101311194	product=3%2C9-dihydroxypterocarpan 6A-monooxygenase-like%2C transcript variant X3	62	0.629244	7	0.0714109	-2.8262	-1.44539	1.15562e-12	5.38449e-12
XR_905243.1	105350692	product=uncharacterized LOC105350692%2C transcript variant X5	86	2.38418	15	0.417996	-2.29187	-1.44527	3.41907e-13	1.63895e-12
XR_905242.1	105350692	product=uncharacterized LOC105350692%2C transcript variant X4	86	2.3717	15	0.415807	-2.29187	-1.44527	3.62853e-12	1.63958e-11
XM_011465582.1	101304965	product=uncharacterized protein At2g38710%2C transcript variant X1	257	8.90604	745	25.9506	1.68288	1.44475	4.11929e-57	6.18063e-56
XM_011469578.1	105352444	product=phenolic glucoside malonyltransferase 1-like	44	0.869895	4	0.0794901	-3.01885	-1.44435	8.05694e-10	3.16223e-09
XM_004305587.2	101293417	product=transcription repressor OFP6	456	25.7087	119	6.74375	-1.77808	-1.44403	8.72256e-47	1.0923e-45
XM_004308664.2	101294808	product=putative disease resistance protein At1g50180	213	2.25875	49	0.522304	-1.94653	-1.444	2.1496e-25	1.63186e-24
XM_004291337.2	101313952	product=auxin response factor 5	367	3.73706	93	0.95189	-1.81789	-1.44308	4.62045e-39	4.88078e-38
XM_011468462.1	105352154	product=uncharacterized LOC105352154	58	2.03285	200	7.04606	1.91949	1.44172	4.49743e-20	2.89326e-19
XM_004300619.2	101293791	product=9-cis-epoxycarotenoid dioxygenase NCED3%2C chloroplastic-like	158	2.3925	34	0.517502	-2.03252	-1.44111	2.84608e-20	1.84592e-19
XM_011465696.1	101291723	product=GDSL esterase/lipase At4g10955-like%2C transcript variant X5	421	11.0799	109	2.8835	-1.78866	-1.4405	1.16613e-43	1.36249e-42
XM_004306854.2	101313450	product=fasciclin-like arabinogalactan protein 10	4470	102.307	1381	31.771	-1.54276	-1.44034	0	0
	101313036		2795	69.7269	847	21.2393	-1.57015	-1.44	1.56506e-235	8.7354e-234
XR_907501.1	101296986	ncrna_class=lncRNA	97	1.19497	310	3.83873	1.81714	1.43977	7.86689e-28	6.391e-27
XM_004298748.2	101304965	product=uncharacterized protein At2g38710%2C transcript variant X2	267	9.03187	769	26.1476	1.6737	1.43977	2.159e-58	3.30539e-57
XM_004291156.2	101310080	product=la protein 1	743	17.23	2005	46.7358	1.58203	1.43941	4.07504e-136	1.33869e-134
XM_004302608.2	101290876	product=glycerol-3-phosphate 2-O-acyltransferase 6	5458	104.706	1701	32.8007	-1.53033	-1.43786	0	0
XM_011466992.1	105351716	product=uncharacterized LOC105351716	34	1.40071	129	5.34194	2.04416	1.43767	9.56028e-15	4.94868e-14
XM_011461988.1	105350292	product=probable trehalose-phosphate phosphatase C%2C transcript variant X2	165	4.52666	36	0.99274	-2.01451	-1.43765	4.28672e-21	2.84903e-20
XM_011463924.1	105350909	product=glycine-rich cell wall structural protein-like	90	3.77526	290	12.2276	1.82816	1.43737	2.20359e-26	1.72054e-25
NM_001287418.1	101314754	product=flavonoid 3'-monooxygenase-like	7676	183.903	2418	58.2304	-1.51505	-1.4373	0	0
XM_004302649.2	101306062	product=protein NRT1/ PTR FAMILY 5.6	111	1.68149	348	5.29896	1.79081	1.43628	2.32419e-30	2.01855e-29
XR_907496.1	101296986	ncrna_class=lncRNA	115	0.974769	359	3.0587	1.78495	1.43624	1.24404e-29	1.06125e-28
XM_011460827.1	101291170	product=probable glycosyltransferase At3g07620%2C transcript variant X1	1960	27.2814	585	8.18476	-1.59154	-1.43559	9.35513e-169	3.81801e-167
XM_004300204.2	101312543	product=protein LOL1	778	28.4021	2089	76.6565	1.57489	1.43538	1.07006e-140	3.6376e-139
XM_004290691.2	101292471	product=uncharacterized LOC101292471	201	2.60499	46	0.59925	-1.95254	-1.43518	3.71359e-24	2.72525e-23
XM_004298875.2	101295712	product=putative mediator of RNA polymerase II transcription subunit 26	5790	116.596	14616	295.851	1.48684	1.43491	0	0
XM_011469770.1	101308414	product=uncharacterized LOC101308414%2C transcript variant X1	301	11.9081	856	34.04	1.65582	1.43486	7.28868e-59	1.12826e-57
XM_004287297.2	101303735	product=uncharacterized LOC101303735	150	3.43525	454	10.4511	1.7424	1.43453	1.80157e-37	1.83304e-36
XM_004287249.2	101315175	product=glucan endo-1%2C3-beta-glucosidase 14	1041	20.3842	2757	54.2648	1.55535	1.43433	2.86575e-181	1.24592e-179
XM_011460418.1	101303871	product=thiamine pyrophosphokinase 1%2C transcript variant X2	201	6.10478	591	18.0427	1.70232	1.4343	1.52304e-47	1.9337e-46
XM_004297501.2	101304277	product=beta-fructofuranosidase%2C insoluble isoenzyme CWINV1-like	481	8.88096	1323	24.5535	1.60888	1.43259	5.29978e-93	1.25748e-91
XM_004299345.2	101314950	product=uncharacterized LOC101314950	119	2.9135	369	9.081	1.77557	1.43226	1.11506e-31	1.01191e-30
XM_004302352.2	101312360	product=histone H2A.1	37	2.22917	3	0.181678	-3.09685	-1.4315	9.59906e-09	3.49591e-08
XM_011470711.1	101293829	product=protein PAIR1	55	1.04803	190	3.63919	1.92115	1.4313	3.48984e-19	2.16567e-18
XM_004302135.2	101295634	product=acyl-[acyl-carrier-protein] desaturase%2C chloroplastic-like	691	13.676	1861	37.0225	1.57909	1.43123	4.06612e-126	1.25685e-124
XM_004287409.2	101291170	product=probable glycosyltransferase At3g07620%2C transcript variant X2	1954	27.9145	585	8.4004	-1.58712	-1.43111	1.19743e-167	4.81982e-166
XM_004304149.2	101309950	product=collagen alpha-2(IV) chain-like%2C transcript variant X1	4862	124.927	12275	317.031	1.487	1.43035	0	0
XM_004288422.2	101308414	product=uncharacterized LOC101308414%2C transcript variant X2	275	7.59529	785	21.7932	1.66094	1.43008	1.06399e-63	1.7816e-62
XM_011467903.1	101312647	product=uncharacterized LOC101312647%2C transcript variant X1	9029	527.598	2872	168.689	-1.50109	-1.42962	0	0
XM_004299340.2	101313512	product=protein IQ-DOMAIN 31	6909	113.422	2182	36.0062	-1.5113	-1.42944	0	0
XM_004302272.2	101312647	product=uncharacterized LOC101312647%2C transcript variant X2	8966	527.259	2852	168.583	-1.50107	-1.42934	0	0
XM_004288498.2	101308508	product=aspartic proteinase nepenthesin-1	232	4.64147	55	1.10604	-1.90575	-1.42817	7.83964e-27	6.18871e-26
XM_004299532.2	101298127	product=LIM domain-containing protein WLIM1-like	673	22.7657	1811	61.5778	1.57784	1.42802	1.24752e-122	3.7648e-121
XR_905244.1	105350692	product=uncharacterized LOC105350692%2C transcript variant X6	85	2.51734	15	0.446534	-2.27519	-1.42744	2.01732e-13	9.76839e-13
XM_011472450.1	105353374	product=uncharacterized LOC105353374	341	12.9354	956	36.4522	1.6356	1.42735	1.48773e-69	2.68607e-68
XM_011466359.1	101308878	product=chromosome-associated kinesin KIF4A	182	1.56718	41	0.35487	-1.9723	-1.42732	2.64206e-22	1.82854e-21
XM_004287636.2	101310736	product=alpha-aminoadipic semialdehyde synthase	232	2.22419	670	6.45651	1.67706	1.42656	2.73829e-51	3.70111e-50
XM_004287863.2	101306267	product=scarecrow-like protein 32	698	11.6034	194	3.2417	-1.69074	-1.42516	2.71527e-66	4.67758e-65
XM_004291111.2	101295972	product=auxin-responsive protein IAA2-like	1905	49.0164	572	14.7939	-1.58286	-1.42506	6.11105e-163	2.38763e-161
XM_004297645.2	101302063	product=uncharacterized LOC101302063	183	2.76311	539	8.18041	1.70433	1.42381	1.12021e-42	1.27776e-41
XR_185076.2	101296986	ncrna_class=lncRNA	114	1.05878	353	3.29546	1.77319	1.42261	1.42341e-27	1.14652e-26
XM_004292377.2	101302905	product=MATE efflux family protein 4%2C chloroplastic-like	297	4.94844	74	1.23932	-1.83927	-1.42199	1.96944e-32	1.81708e-31
XM_011459428.1	105349547	product=homeobox-leucine zipper protein ATHB-52	60	2.44724	203	8.32261	1.89277	1.42142	5.8643e-20	3.76103e-19
XM_004302524.2	101291255	product=CBL-interacting serine/threonine-protein kinase 14-like	2573	48.2312	788	14.8475	-1.55484	-1.41978	2.76289e-214	1.42537e-212
XM_004296450.2	101296851	product=transcription factor bHLH35	262	8.73452	64	2.14465	-1.86547	-1.4194	2.56007e-29	2.16751e-28
XM_004303025.2	101295830	product=protein IQ-DOMAIN 14	597	11.2022	164	3.09324	-1.7066	-1.41882	1.16829e-57	1.76465e-56
XM_004291529.2	101300022	product=aquaporin PIP2-2	8598	243.489	2753	78.3659	-1.49156	-1.41851	0	0
XM_004302683.2	101291348	product=laccase-17-like	498	8.82369	134	2.38652	-1.735	-1.41841	2.02424e-49	2.63043e-48
XM_004299784.2	101302361	product=phosphoenolpyruvate carboxykinase [ATP]-like	438	6.43162	1200	17.712	1.60302	1.4183	4.62678e-84	9.969e-83
XM_004291837.2	101301938	product=uncharacterized LOC101301938	642	21.3066	178	5.93797	-1.69378	-1.41692	2.81211e-61	4.54763e-60
XM_004304754.2	101303830	product=uncharacterized LOC101303830%2C transcript variant X1	746	8.6798	210	2.456	-1.67279	-1.41687	1.27722e-63	2.13499e-62
XM_004288912.2	101304623	product=uncharacterized LOC101304623	81	0.990582	14	0.172097	-2.29958	-1.41673	8.55381e-13	4.00979e-12
XM_004297072.2	101298698	product=ceramide-1-phosphate transfer protein	56	1.68694	191	5.78341	1.90315	1.41662	4.99226e-19	3.07522e-18
XM_004309209.2	101307167	product=cytochrome P450 704C1-like	340	6.35075	87	1.63344	-1.80312	-1.41568	5.4777e-36	5.4264e-35
XM_011472716.1	105353492	product=zinc finger BED domain-containing protein RICESLEEPER 3-like	66	2.86635	219	9.56024	1.86635	1.41473	5.66925e-21	3.7585e-20
XR_907494.1	101296986	ncrna_class=lncRNA	121	1.04338	370	3.20698	1.75562	1.4144	4.12659e-31	3.66428e-30
XM_011466098.1	101298315	product=1-aminocyclopropane-1-carboxylate oxidase homolog 12-like	12	0.421792	62	2.19053	2.42792	1.41318	9.91535e-10	3.86806e-09
XM_004304464.2	101312851	product=putative UDP-glucose flavonoid 3-O-glucosyltransferase 3	12	0.25197	62	1.30858	2.42792	1.41318	9.91535e-10	3.86806e-09
XR_906577.1	101300940	ncrna_class=lncRNA	876	30.5001	251	8.78436	-1.64807	-1.41298	4.56056e-80	9.3979e-79
XM_004307765.2	101304917	product=23.6 kDa heat shock protein%2C mitochondrial	198	6.65505	46	1.55412	-1.93096	-1.41269	1.57167e-23	1.13379e-22
XM_004300166.2	101299868	product=uncharacterized LOC101299868	811	23.5271	2139	62.3731	1.54914	1.41212	3.26172e-140	1.1024e-138
XR_907498.1	101296986	ncrna_class=lncRNA	119	1.09996	364	3.38197	1.75594	1.41197	1.49561e-30	1.31e-29
XM_004296844.2	101300334	product=major allergen Pru ar 1-like	97	4.13953	304	13.0404	1.78903	1.41063	1.01456e-26	7.97686e-26
XM_004309960.2	101311243	product=very-long-chain 3-oxoacyl-CoA reductase 1-like	1776	45.6335	537	13.8693	-1.57269	-1.40976	8.26753e-151	2.97621e-149
XM_011467978.1	101313534	product=formin-like protein 11	409	3.96543	108	1.05252	-1.76022	-1.40968	1.14703e-41	1.28044e-40
XM_004304192.2	101297942	product=alpha-1%2C4 glucan phosphorylase L isozyme%2C chloroplastic/amyloplastic-like	6150	64.1837	1963	20.5925	-1.49595	-1.40957	0	0
XM_011465460.1	101311194	product=3%2C9-dihydroxypterocarpan 6A-monooxygenase-like%2C transcript variant X7	66	0.592244	8	0.0721583	-2.74509	-1.40928	2.55586e-14	1.29698e-13
XM_004291855.2	101307172	product=uncharacterized LOC101307172	158	4.64942	35	1.03526	-1.99188	-1.4064	7.87154e-20	5.02965e-19
XR_907499.1	101296986	ncrna_class=lncRNA	103	1.08757	319	3.3857	1.77257	1.40436	1.55867e-15	8.36819e-15
XM_004302788.2	101297458	product=zinc finger CCCH domain-containing protein 21-like	228	4.62163	55	1.12063	-1.88077	-1.40221	5.21702e-26	4.02937e-25
XM_004305058.2	101306362	product=MATE efflux family protein 2%2C chloroplastic	292	2.52085	814	7.06361	1.62698	1.40205	4.94248e-59	7.69142e-58
XM_011472025.1	101308430	product=protein TRANSPARENT TESTA 12-like	111	2.73397	340	8.41762	1.75735	1.40166	6.73814e-29	5.62689e-28
XM_004288131.2	101314504	product=phospho-2-dehydro-3-deoxyheptonate aldolase 2%2C chloroplastic-like	17703	300.386	5827	99.3842	-1.45192	-1.40144	0	0
XM_004309392.2	101296826	product=long chain acyl-CoA synthetase 2	4266	64.045	1353	20.4175	-1.50492	-1.40111	0	0
XM_004307686.2	101305307	product=probable chalcone--flavonone isomerase 3	14658	604.547	4810	199.407	-1.4563	-1.40078	0	0
XM_004289808.2	101309107	product=protein NUCLEAR FUSION DEFECTIVE 4-like	1002	18.1283	2597	47.228	1.52416	1.40045	2.61456e-165	1.03954e-163
XM_004287779.2	101303933	product=histone H1	13110	532.365	4298	175.434	-1.45763	-1.39892	0	0
XM_011467962.1	105352043	product=eukaryotic initiation factor 4A-3-like	2	0.0499616	24	0.602639	3.20997	1.39856	3.34929e-06	9.81886e-06
XM_004310203.2	101292086	product=transcription factor IBH1-like	2	0.0717348	24	0.865267	3.20997	1.39856	3.34929e-06	9.81886e-06
XM_004310094.2	101303873	product=uncharacterized LOC101303873	382	12.4426	1041	34.0829	1.59502	1.39727	1.28872e-72	2.42383e-71
XM_004301979.2	101296971	product=cation/calcium exchanger 2	1050	15.6299	2710	40.5486	1.51814	1.3972	2.74383e-171	1.13723e-169
XM_004288216.2	101291465	product=heptahelical transmembrane protein 4-like%2C transcript variant X1	1159	21.9601	2978	56.7171	1.51178	1.39654	1.0344e-186	4.64891e-185
XM_004294431.2	101313586	product=zinc finger protein CONSTANS-LIKE 4	510	14.0964	140	3.88959	-1.70655	-1.39585	1.48523e-49	1.93689e-48
XM_011467755.1	101303830	product=uncharacterized LOC101303830%2C transcript variant X2	684	8.25539	194	2.35355	-1.66155	-1.39531	8.87684e-70	1.60765e-68
XM_004303663.2	101305492	product=protein TIFY 11A-like	1017	36.908	299	10.9071	-1.61162	-1.39514	4.85674e-90	1.11973e-88
XM_004307939.2	101313455	product=calcineurin B-like protein 4	184	4.98852	531	14.4706	1.67498	1.39439	5.63076e-41	6.20061e-40
XM_004293660.2	101299165	product=fatty acid 2-hydroxylase 1-like%2C transcript variant X3	168	4.80562	489	14.0601	1.68684	1.39388	6.06285e-38	6.22821e-37
XR_907825.1	105352907	ncrna_class=lncRNA	29	0.537596	2	0.0372673	-3.17085	-1.39338	2.05778e-07	6.79426e-07
XM_004299034.2	101293199	product=3-ketoacyl-CoA synthase 6	11021	204.202	3618	67.3826	-1.45564	-1.39167	0	0
XM_004293228.2	101314158	product=derlin-2.2	818	26.5035	2126	69.2394	1.52796	1.39124	2.81062e-136	9.2435e-135
XR_905358.1	105350942	ncrna_class=lncRNA	21	0.647954	0	0	-4.30835	-1.39058	2.11881e-06	6.33868e-06
XM_011463867.1	105350877	product=uncharacterized LOC105350877	21	0.635719	1	0.0304288	-3.30835	-1.39058	4.43894e-06	1.2857e-05
XR_907495.1	101296986	ncrna_class=lncRNA	118	1.00227	356	3.03943	1.73604	1.38999	2.5031e-30	2.17071e-29
XM_004291013.2	101290830	product=endochitinase PR4-like	17	0.651579	74	2.85094	2.20997	1.38964	4.19674e-10	1.67956e-09
	101314093		764	10.1917	220	2.94996	-1.64034	-1.38946	1.08494e-69	1.96125e-68
XM_004304580.2	101297171	product=universal stress protein A-like protein	412	19.8577	1111	53.8251	1.58002	1.38921	3.31443e-76	6.51831e-75
XM_004291887.2	101291495	product=nucleobase-ascorbate transporter 3	1269	20.4861	3232	52.4454	1.49912	1.3888	1.19393e-199	5.79235e-198
XM_004306582.2	101301133	product=homeobox-leucine zipper protein ATHB-12-like	951	25.4278	2450	65.8467	1.51542	1.38835	1.31692e-154	4.87858e-153
XM_004293789.2	101311835	product=aspartic proteinase CDR1-like	131	2.38882	390	7.14851	1.71771	1.38813	8.91953e-32	8.10949e-31
XM_011462103.1	101299165	product=fatty acid 2-hydroxylase 1-like%2C transcript variant X4	168	4.80189	487	13.9917	1.68094	1.38781	9.07624e-38	9.29609e-37
XM_011462102.1	101299165	product=fatty acid 2-hydroxylase 1-like%2C transcript variant X2	168	5.55555	487	16.1877	1.68094	1.38781	2.70121e-38	2.79893e-37
XM_011464255.1	101304271	product=uncharacterized WD repeat-containing protein C2A9.03-like%2C transcript variant X4	1746	41.1887	4392	104.144	1.48141	1.38707	8.76622e-266	5.4423e-264
XM_011467887.1	101291465	product=heptahelical transmembrane protein 4-like%2C transcript variant X2	1030	27.1853	2642	70.092	1.50921	1.387	1.9836e-165	7.90823e-164
XM_011470935.1	101295089	product=TMV resistance protein N-like	71	0.672461	10	0.0952024	-2.55942	-1.38682	1.1681e-12	5.44177e-12
XM_004298702.2	101292018	product=cytochrome P450 87A3-like%2C transcript variant X1	90	1.80155	17	0.342051	-2.18679	-1.3864	2.56661e-13	1.2374e-12
XM_011462101.1	101299165	product=fatty acid 2-hydroxylase 1-like%2C transcript variant X1	168	5.6622	486	16.4646	1.67798	1.38476	6.06285e-38	6.22821e-37
XM_004300385.2	101292605	product=histone H3.2	116	6.42209	24	1.33558	-2.07543	-1.38469	9.85839e-16	5.34864e-15
XM_004296321.2	101300810	product=myb-related protein Myb4-like	27	0.774133	104	2.99726	2.05797	1.38446	2.45857e-12	1.12357e-11
XM_011464980.1	105351207	product=uncharacterized LOC105351207	182	5.84551	522	16.8524	1.66605	1.38371	5.49829e-40	5.91904e-39
XR_907500.1	101296986	ncrna_class=lncRNA	125	1.02741	373	3.08164	1.72069	1.38364	9.07e-31	8.00295e-30
XR_907493.1	101296986	ncrna_class=lncRNA	125	1.02695	373	3.08027	1.72069	1.38364	1.49561e-30	1.31e-29
XM_011465424.1	101298122	product=uncharacterized LOC101298122	101	0.751724	20	0.149626	-2.12903	-1.38259	2.58126e-14	1.30908e-13
XM_011464254.1	101304271	product=uncharacterized WD repeat-containing protein C2A9.03-like%2C transcript variant X3	1821	40.0856	4558	100.854	1.47427	1.38183	6.44682e-273	4.07136e-271
XM_004307626.2	101310936	product=transcription factor bHLH51	289	8.20317	74	2.11132	-1.80001	-1.38136	7.98381e-31	7.05517e-30
XM_004294677.2	101294342	product=trans-cinnamate 4-monooxygenase	15431	325.496	5142	109.024	-1.43416	-1.38035	0	0
XM_011464253.1	101304271	product=uncharacterized WD repeat-containing protein C2A9.03-like%2C transcript variant X2	1775	42.2513	4441	106.258	1.47366	1.38002	3.42412e-265	2.1035e-263
XM_011459753.1	101306871	product=uncharacterized LOC101306871%2C transcript variant X2	7	0.368191	49	2.59066	2.79493	1.37966	4.01146e-10	1.60705e-09
XM_004299778.2	101300726	product=transcription factor bHLH93-like	978	25.0073	290	7.45358	-1.59921	-1.37923	7.9246e-86	1.73813e-84
XM_004303272.2	101302280	product=DCC family protein At1g52590%2C chloroplastic%2C transcript variant X1	185	8.67845	528	24.8968	1.65904	1.37875	3.65124e-40	3.94951e-39
XM_011464220.1	101315038	product=glutathione reductase%2C cytosolic%2C transcript variant X2	1482	27.6818	3726	69.9565	1.48057	1.37824	2.51285e-222	1.34615e-220
XM_011463474.1	105350692	product=uncharacterized LOC105350692%2C transcript variant X1	76	2.94354	13	0.506103	-2.30835	-1.37712	2.01732e-13	9.76839e-13
XM_004307937.2	101312869	product=phosphatidylinositol 4-kinase gamma 3	294	4.49617	805	12.3746	1.60114	1.37638	5.94511e-57	8.87015e-56
XM_004290758.2	101311433	product=uncharacterized protein At5g01610-like	108	5.63245	22	1.15328	-2.09354	-1.37629	6.51611e-15	3.39935e-14
XM_004299565.2	101308765	product=uncharacterized WD repeat-containing protein C2A9.03	556	10.4595	1459	27.5887	1.5413	1.37605	1.58913e-95	3.90002e-94
XM_004296626.2	101304271	product=uncharacterized WD repeat-containing protein C2A9.03-like%2C transcript variant X1	1850	40.4823	4609	101.377	1.46754	1.37575	7.76162e-274	4.91228e-272
XM_011460825.1	101312512	product=5'-3' exoribonuclease 3%2C transcript variant X3	1786	20.9456	4452	52.4813	1.46832	1.37491	8.05077e-265	4.93539e-263
XM_011459183.1	105349460	product=uncharacterized LOC105349460	508	25.2097	1338	66.742	1.5465	1.37381	2.9626e-88	6.69854e-87
XM_011460781.1	101303769		NA	1139	NA	1139	1.44393	1.3735	NA	NA
XM_004296583.2	101315038	product=glutathione reductase%2C cytosolic%2C transcript variant X1	1476	26.9286	3699	67.8344	1.47593	1.37334	4.13698e-225	2.23252e-223
XM_004290022.2	101302887	product=probable protein phosphatase 2C 27%2C transcript variant X1	765	16.5145	1969	42.7258	1.51386	1.37232	2.63645e-124	8.07271e-123
XM_004302422.2	101308690	product=gibberellin receptor GID1C-like	933	20.0474	277	5.98266	-1.59726	-1.37224	7.52249e-82	1.58129e-80
XM_004294192.2	101314443	product=vacuolar cation/proton exchanger 3-like	1807	30.8031	4494	77.0032	1.465	1.37211	2.75171e-266	1.71196e-264
XR_183745.2	101295170	ncrna_class=lncRNA	42	1.25292	4	0.119943	-2.95326	-1.3719	2.61132e-09	9.89455e-09
XM_011470997.1	105349305	product=probable receptor-like protein kinase At5g39020%2C transcript variant X3	42	0.956523	4	0.0915683	-2.95326	-1.3719	2.61132e-09	9.89455e-09
XM_011459794.1	101302887	product=probable protein phosphatase 2C 27%2C transcript variant X2	765	16.602	1968	42.9303	1.51313	1.37158	1.81996e-124	5.58431e-123
XM_011462762.1	105350538	product=uncharacterized LOC105350538	28	0.636503	106	2.42207	2.03456	1.37069	2.33297e-12	1.06817e-11
XM_004294220.2	101297998	product=transcription factor DIVARICATA	1261	23.8682	3172	60.3499	1.48121	1.37035	4.1472e-192	1.92592e-190
XM_004299366.2	101296290	product=transcription factor WER-like%2C transcript variant X1	189	6.25	45	1.49579	-1.89522	-1.37005	4.43431e-22	3.0502e-21
XM_004293485.2	101291604	product=potassium channel KAT1-like	536	5.2492	151	1.48643	-1.66977	-1.36929	1.31726e-50	1.75773e-49
XM_011467230.1	101305084	product=protein Daple	2776	13.3641	885	4.28256	-1.49707	-1.3689	6.33181e-220	3.34308e-218
XM_004287477.2	101311311	product=probable protein arginine N-methyltransferase 1	862	21.7694	2200	55.8473	1.50181	1.36822	5.31041e-137	1.75237e-135
XM_011463451.1	101310011	product=uncharacterized LOC101310011%2C transcript variant X2	161	2.80413	37	0.647758	-1.94084	-1.3678	1.33291e-19	8.43681e-19
XM_004295040.2	101310011	product=uncharacterized LOC101310011%2C transcript variant X1	161	2.8228	37	0.652071	-1.94084	-1.3678	1.33291e-19	8.43681e-19
XM_011471700.1	105353083	product=uncharacterized LOC105353083	186	10.3911	526	29.5375	1.64584	1.36591	1.56584e-39	1.67093e-38
XM_004309072.2	101311142	product=zingipain-2-like%2C transcript variant X1	70	1.00273	10	0.143987	-2.53924	-1.36481	4.38329e-12	1.97181e-11
XM_011466425.1	101303234		299	5.86729	78	1.53851	-1.77396	-1.36478	2.7906e-31	2.4908e-30
XM_004306606.2	101308210	product=uncharacterized protein At4g00950	563	18.5844	1464	48.5758	1.52821	1.36376	1.58377e-94	3.83231e-93
XM_004294172.2	101308356	product=probable glutathione S-transferase	2721	77.8943	870	25.0343	-1.49284	-1.36354	8.08183e-215	4.19154e-213
XM_004291852.2	101306300	product=protein BRASSINAZOLE-RESISTANT 1	1106	27.4429	335	8.35523	-1.56904	-1.36353	1.82294e-94	4.40377e-93
XM_004294542.2	101299067	product=histone H4	85	5.12107	16	0.968949	-2.18772	-1.36309	1.09509e-12	5.10653e-12
XM_011463603.1	101300431	product=beta-glucosidase 12-like	9	0.184461	57	1.17429	2.68713	1.36223	4.01146e-10	1.60705e-09
XM_004289956.2	101306871	product=uncharacterized LOC101306871%2C transcript variant X1	9	0.585265	57	3.72584	2.68713	1.36223	2.5311e-09	9.6024e-09
XM_004294235.2	101302629	product=uncharacterized LOC101302629%2C transcript variant X2	883	34.2352	2239	87.2581	1.49246	1.36033	4.681e-138	1.55518e-136
XM_011471903.1	101311142	product=zingipain-2-like%2C transcript variant X3	71	1.01116	11	0.157468	-2.43388	-1.36017	2.03107e-12	9.33738e-12
XM_004296632.2	101306033	product=probable protein phosphatase 2C 33	288	5.22848	781	14.2519	1.58718	1.35981	1.48597e-54	2.10965e-53
XM_011470531.1	101313850	product=probable leucine-rich repeat receptor-like protein kinase At1g35710	78	0.629595	14	0.113588	-2.24581	-1.35893	4.16685e-12	1.87776e-11
XM_004292452.2	101304838	product=putative laccase-9	78	1.40361	14	0.253232	-2.24581	-1.35893	4.16685e-12	1.87776e-11
XM_004299893.2	101311964	product=DEAD-box ATP-dependent RNA helicase 16	124	1.94889	364	5.7505	1.69705	1.35788	2.99294e-29	2.52817e-28
XM_004294695.2	101300228	product=CBL-interacting serine/threonine-protein kinase 10	3820	66.0337	9218	160.169	1.42174	1.35743	0	0
XM_011461539.1	105350125	product=uncharacterized LOC105350125	78	5.50956	243	17.2531	1.77803	1.35741	1.55053e-21	1.04738e-20
XM_011462611.1	101302629	product=uncharacterized LOC101302629%2C transcript variant X1	889	34.5769	2249	87.9252	1.48913	1.3574	5.8221e-138	1.93211e-136
XM_004300621.2	101294565	product=heme-binding protein 2	3574	135.158	8625	327.859	1.42183	1.35535	0	0
XM_004307708.2	101312487	product=uncharacterized LOC101312487	296	12.4874	798	33.8395	1.57881	1.35429	3.10077e-55	4.48479e-54
XM_004287171.2	101291657	product=DNA replication licensing factor MCM5	163	2.53163	38	0.593246	-1.92107	-1.35413	1.34604e-19	8.50614e-19
XM_004304013.2	101293113	product=protein IQ-DOMAIN 1	652	12.3094	190	3.60565	-1.62243	-1.35257	5.72472e-59	8.89929e-58
XM_004296057.2	101310105	product=putative ATP-dependent DNA helicase Q1	53	0.639672	6	0.0727901	-2.79645	-1.35245	9.92949e-11	4.13301e-10
XM_004287452.2	101303737	product=gamma-glutamyltranspeptidase 3	782	13.2447	232	3.94968	-1.5976	-1.35224	5.80032e-69	1.03765e-67
XR_183653.2	101294689	ncrna_class=lncRNA	929	71.2137	2337	180.072	1.48105	1.35205	4.36589e-142	1.4963e-140
XM_011463457.1	101290743	product=uncharacterized LOC101290743%2C transcript variant X1	425	21.7042	1115	57.2361	1.54049	1.35181	2.00255e-73	3.79319e-72
XM_004293871.2	101312324	product=uncharacterized LOC101312324	3	0.0504401	29	0.490108	3.05797	1.35104	8.38077e-07	2.60454e-06
XM_011469093.1	101309484	product=FK506-binding protein 3-like	1267	70.7825	3144	176.551	1.46158	1.35075	3.10026e-186	1.3891e-184
XM_011470083.1	101300927	product=DNA-directed RNA polymerases II and V subunit 8A-like	94	7.55106	284	22.9318	1.73604	1.34985	5.17859e-24	3.78707e-23
XM_004308553.1	101303375	product=putative disease resistance RPP13-like protein 1	296	2.53167	78	0.670577	-1.75946	-1.34977	1.09425e-30	9.62042e-30
XM_004287368.2	101301233	product=UDP-glycosyltransferase 91C1	38	0.775816	133	2.72939	1.93177	1.34957	4.58202e-14	2.28929e-13
XM_004293992.2	101300986	product=glucomannan 4-beta-mannosyltransferase 2	23380	333.744	8018	115.047	-1.39276	-1.34948	0	0
XM_004289724.2	101306478	product=serine carboxypeptidase-like 18	152	3.23398	35	0.748517	-1.93638	-1.34821	1.45172e-18	8.76927e-18
XM_004308116.2	101292064	product=peptidyl-prolyl cis-trans isomerase FKBP53	278	5.53473	750	15.009	1.57963	1.3481	4.49845e-52	6.17125e-51
XM_004291608.2	101303300	product=CBS domain-containing protein CBSX5-like	357	7.46213	945	19.8548	1.55296	1.34764	2.37509e-63	3.95664e-62
XM_011466698.1	101315287	product=protein ZINC INDUCED FACILITATOR 1-like	17	0.7035	72	2.99493	2.17098	1.34755	1.13411e-09	4.40637e-09
XM_004295403.2	101312813	product=reticuline oxidase-like protein	95	1.87919	19	0.377781	-2.11196	-1.347	1.8314e-13	8.8806e-13
XM_004294127.2	101294249	product=cytochrome P450 71A1-like	115	1.5693	338	4.63621	1.69824	1.34652	2.5386e-27	2.03248e-26
XM_004287890.2	101314124	product=septum-promoting GTP-binding protein 1	10	0.321742	57	1.84341	2.54963	1.34585	1.39149e-09	5.36864e-09
XM_004302509.2	101311683	product=probable WRKY transcription factor 33	523	9.77389	1349	25.3406	1.5164	1.34565	3.61244e-86	7.96504e-85
XM_004293155.2	101305343	product=zinc-finger homeodomain protein 6	455	9.7937	128	2.76939	-1.67058	-1.34512	2.72943e-43	3.16504e-42
XM_011472714.1	101308226	product=putative cell division cycle ATPase	113	1.18771	24	0.253562	-2.03796	-1.34509	4.41726e-15	2.32053e-14
XM_004302603.2	101314192	product=tubulin beta-1 chain-like	3642	80.8956	1195	26.6804	-1.45583	-1.34496	1.92768e-277	1.23875e-275
XM_004301080.2	101303618	product=transcription factor PIF7%2C transcript variant X1	49	1.21093	163	4.04903	1.86477	1.3446	1.59209e-15	8.54295e-15
XM_004300269.2	101307307	product=serine/threonine-protein kinase SAPK2-like	1619	34.8687	3964	85.8148	1.44241	1.34407	4.45316e-229	2.43453e-227
XM_011466092.1	101296290	product=transcription factor WER-like%2C transcript variant X2	189	5.7593	46	1.40898	-1.86419	-1.34302	1.13602e-21	7.70754e-21
XM_011462764.1	101295023	product=prohibitin-1%2C mitochondrial-like%2C transcript variant X2	27	1.05125	101	3.95279	2.01615	1.33991	1.01052e-11	4.46425e-11
XM_004290528.2	101314044	product=basic blue protein	175	7.30752	42	1.76287	-1.88209	-1.33913	2.0018e-20	1.30469e-19
XM_004290183.2	101301446	product=zinc finger protein KNUCKLES-like	28	0.561701	2	0.0403289	-3.12194	-1.33862	3.75859e-07	1.21111e-06
XM_004291819.2	101296348	product=uncharacterized LOC101296348	66	2.53229	208	8.02181	1.79235	1.33742	6.61114e-19	4.05455e-18
XM_004294204.2	101293077	product=uncharacterized LOC101293077%2C transcript variant X1	1275	18.9409	3133	46.7833	1.44746	1.33681	1.36966e-182	6.01724e-181
XM_004307161.2	101313252	product=cysteine proteinase inhibitor 12	1471	60.5338	3594	148.663	1.43929	1.33613	3.79557e-207	1.88511e-205
XM_011459414.1	101314805	product=uncharacterized LOC101314805%2C transcript variant X1	1071	21.4968	2648	53.4246	1.45622	1.33569	1.01029e-154	3.74739e-153
XM_004307306.2	101311037	product=cyclic nucleotide-gated ion channel 1-like%2C transcript variant X1	675	11.9771	200	3.56711	-1.59875	-1.33499	4.84464e-60	7.66951e-59
XR_183746.2	101295170	ncrna_class=lncRNA	41	1.34496	4	0.131894	-2.91931	-1.33427	4.69623e-09	1.74792e-08
XM_004293242.2	101293372	product=starch synthase 3%2C chloroplastic/amyloplastic%2C transcript variant X1	1722	15.0031	549	4.80794	-1.49634	-1.3341	3.41149e-137	1.12957e-135
XM_004287639.2	101311605	product=RING-H2 finger protein ATL2	207	8.00046	567	22.0276	1.60039	1.33347	1.16642e-40	1.27823e-39
XM_011459415.1	101314805	product=uncharacterized LOC101314805%2C transcript variant X2	1065	19.8225	2629	49.1856	1.45393	1.33304	3.09731e-156	1.15914e-154
XM_004305010.2	101314876	product=protein LURP-one-related 5-like	364	13.3678	952	35.1427	1.53566	1.33193	1.1457e-62	1.89034e-61
XM_004290127.2	101309497	product=ninja-family protein AFP2-like	182	4.28795	504	11.9357	1.61552	1.33173	6.91719e-37	6.95111e-36
XM_004302515.2	101313427	product=uncharacterized LOC101313427	14	0.183441	63	0.829753	2.24419	1.33157	5.09775e-09	1.89327e-08
XM_004291332.2	101312512	product=5'-3' exoribonuclease 3%2C transcript variant X1	2201	20.3701	5289	49.2024	1.41553	1.33088	2.38294e-293	1.60522e-291
XM_004293014.2	101301756	product=uncharacterized LOC101301756	559	19.7995	163	5.80322	-1.62065	-1.32987	8.84136e-51	1.18085e-49
XM_004289298.2	101290702	product=cyclin-D5-1	194	2.82955	48	0.703714	-1.84154	-1.32968	6.90649e-22	4.72632e-21
XM_011466717.1	101301532	product=cyclic pyranopterin monophosphate synthase%2C mitochondrial%2C transcript variant X2	122	2.41328	352	6.99889	1.67209	1.32937	1.00154e-27	8.1072e-27
XM_011468024.1	105352058	product=uncharacterized LOC105352058	242	3.93081	652	10.6452	1.57721	1.32933	2.0553e-45	2.50318e-44
XM_004305141.2	101310048	product=L-type lectin-domain containing receptor kinase IV.1	516	7.97727	1317	20.4658	1.50119	1.32903	8.458e-83	1.79598e-81
XM_011465471.1	105351400	product=deoxyribodipyrimidine photo-lyase-like	19	0.293368	77	1.19506	2.11455	1.32871	6.6513e-10	2.62566e-09
XM_011468795.1	101302280	product=DCC family protein At1g52590%2C chloroplastic%2C transcript variant X2	79	6.04328	241	18.5311	1.74801	1.32869	7.41362e-21	4.90276e-20
XR_903771.1	101297980	product=probable serine/threonine-protein kinase RLCKVII%2C transcript variant X2	598	11.5866	1513	29.4668	1.48882	1.32854	7.59269e-91	1.76298e-89
XM_004306973.2	101301239	product=red chlorophyll catabolite reductase%2C chloroplastic	550	16.1847	1398	41.3512	1.49535	1.32842	3.31421e-87	7.40781e-86
XM_004302337.2	101307509	product=uncharacterized LOC101307509	117	5.39248	339	15.7051	1.67783	1.3283	6.59361e-27	5.2121e-26
XM_011460824.1	101312512	product=5'-3' exoribonuclease 3%2C transcript variant X2	2197	20.3945	5270	49.1738	1.41296	1.32821	2.59897e-295	1.77111e-293
XM_011461688.1	101293372	product=starch synthase 3%2C chloroplastic/amyloplastic%2C transcript variant X2	1697	15.2056	543	4.8906	-1.49108	-1.32788	1.28877e-134	4.18678e-133
XM_004299777.2	101300446	product=phosphoglycerate mutase-like protein 1	1418	32.9245	3449	80.4961	1.4328	1.32767	2.29074e-197	1.08794e-195
XM_004306751.2	101305880	product=uncharacterized LOC101305880	1141	11.9012	356	3.73244	-1.52649	-1.32626	5.0841e-94	1.22315e-92
XM_004298949.2	101293487	product=uncharacterized LOC101293487	399	5.55791	112	1.56818	-1.6726	-1.32554	2.90342e-38	3.00632e-37
XM_004288627.2	101301532	product=cyclic pyranopterin monophosphate synthase%2C mitochondrial%2C transcript variant X1	122	2.43022	351	7.02802	1.668	1.32513	1.49878e-27	1.20656e-26
XM_011462633.1	101293077	product=uncharacterized LOC101293077%2C transcript variant X2	863	17.0801	2137	42.5132	1.45824	1.32412	8.59073e-127	2.66667e-125
XM_011461689.1	101293372	product=starch synthase 3%2C chloroplastic/amyloplastic%2C transcript variant X3	1666	15.2921	534	4.92688	-1.48856	-1.32398	6.58777e-132	2.09828e-130
XM_011471325.1	101311037	product=cyclic nucleotide-gated ion channel 1-like%2C transcript variant X2	685	11.8411	205	3.56201	-1.58449	-1.32355	7.27827e-60	1.14788e-58
XM_011460685.1	101300498	product=ultraviolet-B receptor UVR8	215	3.83708	582	10.4406	1.58354	1.32107	5.3163e-41	5.85872e-40
XM_004309492.2	101304828	product=uncharacterized LOC101304828	574	25.1657	169	7.44771	-1.60695	-1.32088	1.53525e-51	2.08276e-50
XM_004301975.2	101295533	product=probable serine/threonine-protein kinase WNK9%2C transcript variant X2	1755	23.94	4213	57.7667	1.41398	1.31922	4.32934e-235	2.4027e-233
XM_011461138.1	101307463	product=auxin response factor 18-like	76	1.13728	14	0.210581	-2.20882	-1.31908	1.18823e-11	5.23041e-11
XM_011471924.1	101309397	product=glutamate synthase [NADH]%2C amyloplastic%2C transcript variant X3	18788	110.415	6561	38.7577	-1.3666	-1.31865	0	0
XM_011471923.1	101309397	product=glutamate synthase [NADH]%2C amyloplastic%2C transcript variant X2	18786	110.544	6561	38.8072	-1.36645	-1.3185	0	0
XM_011467630.1	101295533	product=probable serine/threonine-protein kinase WNK9%2C transcript variant X1	1757	23.9319	4215	57.7087	1.41302	1.31831	2.99011e-235	1.66261e-233
XM_011466759.1	101306635	product=scopoletin glucosyltransferase-like	1007	20.1464	2465	49.5706	1.44176	1.3173	3.59374e-143	1.23745e-141
XM_011466049.1	105351523	product=uncharacterized LOC105351523	334	8.4466	92	2.33864	-1.69778	-1.31715	6.14822e-33	5.72122e-32
XM_004303133.2	101306834	product=uncharacterized LOC101306834	337	8.43568	877	22.0663	1.52828	1.31651	1.93471e-57	2.9163e-56
XM_011472477.1	105349240	product=auxin-binding protein ABP19b-like	254	14.5879	67	3.86787	-1.75581	-1.31524	1.52612e-26	1.19572e-25
XM_004304287.2	101306071	product=uncharacterized LOC101306071	322	5.8114	840	15.2385	1.53165	1.31517	2.70007e-55	3.91103e-54
XR_905869.1	101312056	product=oxysterol-binding protein-related protein 2A%2C transcript variant X2	305	3.69686	83	1.01123	-1.71399	-1.31471	1.3612e-30	1.19316e-29
XM_011472030.1	105353184	product=uncharacterized LOC105353184	20	0.862495	1	0.0433477	-3.24124	-1.31446	8.15426e-06	2.29776e-05
XM_011465493.1	101293099	product=uncharacterized LOC101293099	20	0.304977	0	0	-4.24124	-1.31446	3.7839e-06	1.10339e-05
XM_011464435.1	105351056	product=uncharacterized LOC105351056	396	21.8581	112	6.21404	-1.66174	-1.31435	1.08648e-37	1.11125e-36
XM_011469590.1	105352447	product=uncharacterized LOC105352447	68	5.4506	210	16.9197	1.76365	1.31386	1.22465e-18	7.41903e-18
XM_004287696.2	101304907	product=endochitinase-like	774	20.2978	1913	50.4268	1.4554	1.31382	2.35087e-113	6.64296e-112
XM_004307927.2	101309397	product=glutamate synthase [NADH]%2C amyloplastic%2C transcript variant X1	19547	96.6775	6859	34.0993	-1.35966	-1.31273	0	0
XM_004293541.2	101309224	product=protein ODORANT1-like	87	1.94768	259	5.82825	1.71401	1.31228	1.18816e-21	8.05006e-21
XM_004294414.2	101307764	product=scarecrow-like protein 21%2C transcript variant X2	748	12.9362	1849	32.1427	1.45557	1.31158	1.182e-109	3.22348e-108
XM_004294413.2	101307764	product=scarecrow-like protein 21%2C transcript variant X1	748	13.2533	1849	32.9304	1.45557	1.31158	1.182e-109	3.22348e-108
XM_004300959.2	101309643	product=copper amine oxidase 1-like	213	2.2198	573	6.00246	1.57452	1.31059	4.90245e-40	5.29121e-39
XM_011464531.1	105351087	product=uncharacterized LOC105351087	20	0.241623	79	0.959345	2.08069	1.31046	6.42172e-10	2.53846e-09
XM_004310182.2	101309608	product=formin-like protein 3	579	12.776	172	3.81491	-1.5942	-1.31025	1.85754e-51	2.51531e-50
XM_011466036.1	101303618	product=transcription factor PIF7%2C transcript variant X2	50	1.22824	162	4.00006	1.82738	1.31021	4.74594e-16	2.61804e-15
XM_004294996.2	101296755	product=beta-glucosidase-like SFR2%2C chloroplastic	2308	36.5549	5460	86.9244	1.39298	1.3101	1.58554e-296	1.08554e-294
XM_011470615.1	101305103	product=uncharacterized LOC101305103	591	22.6755	176	6.78768	-1.59077	-1.30989	2.43102e-52	3.34914e-51
XM_011466824.1	101297840	product=homeobox-leucine zipper protein HDG5%2C transcript variant X4	450	5.3317	130	1.54823	-1.63248	-1.30836	1.21784e-41	1.3587e-40
XM_011466822.1	101297840	product=homeobox-leucine zipper protein HDG5%2C transcript variant X1	450	5.31462	130	1.54327	-1.63248	-1.30836	1.21784e-41	1.3587e-40
XM_004303524.2	101310138	product=uncharacterized aarF domain-containing protein kinase At1g79600%2C chloroplastic	683	9.27222	1691	23.0752	1.45774	1.30716	1.03437e-100	2.62653e-99
XM_011463176.1	101291997	product=bZIP transcription factor TRAB1%2C transcript variant X2	871	17.5878	2131	43.2529	1.44089	1.30714	6.18427e-124	1.88768e-122
XM_004290912.2	101309787	product=zinc finger protein ZAT10	438	14.7487	1112	37.6377	1.49324	1.30643	1.27737e-69	2.30769e-68
XM_004287177.2	101293336	product=sugar transport protein 7	420	7.92939	1069	20.2865	1.4968	1.30615	2.88619e-67	5.04919e-66
XM_004298984.2	101303327	product=uncharacterized LOC101303327	35	1.64606	121	5.72007	1.91189	1.30576	8.87732e-13	4.15746e-12
XM_004306876.2	101295454	product=vestitone reductase-like%2C transcript variant X1	322	8.10976	89	2.2531	-1.69246	-1.30556	1.64022e-31	1.47751e-30
XM_011469438.1	101303150	product=uncharacterized protein At4g06744	8167	152.781	2829	53.1959	-1.3781	-1.3053	0	0
XM_004296829.2	101295907	product=probable protein phosphatase 2C 34	708	14.2418	1747	35.3234	1.45293	1.30493	2.08743e-103	5.39877e-102
XM_004306712.2	101292050	product=L-3-cyanoalanine synthase 2%2C mitochondrial	4797	110.546	1638	37.9425	-1.39854	-1.30322	0	0
XM_004307954.2	101292939	product=probable protein phosphatase 2C 76	1090	24.7629	2633	60.1263	1.42268	1.30277	2.17058e-149	7.74719e-148
XM_004306130.2	101310346	product=UDP-glycosyltransferase 73C1-like	210	2.34709	54	0.606658	-1.78866	-1.30214	9.2925e-23	6.53777e-22
XM_004299580.2	101313021	product=protein NUCLEAR FUSION DEFECTIVE 4-like	277	5.46174	75	1.48646	-1.71994	-1.30108	4.46587e-28	3.65438e-27
XM_011470830.1	101295454	product=vestitone reductase-like%2C transcript variant X2	321	8.10117	89	2.25773	-1.68799	-1.30093	1.05194e-31	9.54926e-31
XM_011465430.1	101312056	product=oxysterol-binding protein-related protein 2A%2C transcript variant X1	299	4.06963	82	1.12186	-1.7027	-1.3007	8.58843e-30	7.35008e-29
XM_004304575.2	101295839	product=carbonic anhydrase 2	17759	541.608	6280	192.515	-1.34849	-1.2994	0	0
XM_004288426.2	101309584	product=uncharacterized LOC101309584	429	8.10346	1085	20.6007	1.48769	1.29885	1.44598e-67	2.55097e-66
XM_004294743.2	101314447	product=uncharacterized protein At5g39865	514	11.9046	152	3.53861	-1.59996	-1.2986	4.10459e-46	5.07497e-45
XM_011466823.1	101297840	product=homeobox-leucine zipper protein HDG5%2C transcript variant X2	450	5.1997	131	1.52152	-1.62151	-1.29827	2.69286e-41	2.98275e-40
XM_004300159.2	101297840	product=homeobox-leucine zipper protein HDG5%2C transcript variant X3	450	5.21605	131	1.5263	-1.62151	-1.29827	2.69286e-41	2.98275e-40
XM_004309805.2	101297980	product=probable serine/threonine-protein kinase RLCKVII%2C transcript variant X1	616	13.0986	1524	32.5738	1.45655	1.29806	1.55847e-93	3.72494e-92
XM_011471181.1	101314505	product=probable receptor-like protein kinase At1g67000%2C transcript variant X3	113	1.78897	25	0.397835	-1.98137	-1.29793	2.89773e-15	1.53604e-14
XM_011468144.1	101309945		NA	3338	NA	3338	1.36986	1.29792	NA	NA
XM_011471854.1	105353125	product=uncharacterized LOC105353125	239	11.4002	631	30.2539	1.54797	1.29782	9.88819e-43	1.13141e-41
XR_905241.1	105350691	ncrna_class=lncRNA	106	6.514	23	1.42072	-2.00543	-1.2972	5.06868e-14	2.52899e-13
XM_011467828.1	101296790	product=cyclic nucleotide-gated ion channel 1-like%2C transcript variant X2	537	7.46891	1338	18.7059	1.46656	1.29713	2.22272e-75	4.33062e-74
XM_011465431.1	101312056	product=oxysterol-binding protein-related protein 2A%2C transcript variant X3	292	4.34836	80	1.19749	-1.70383	-1.29709	3.65741e-29	3.08323e-28
XM_011464391.1	101297718	product=monothiol glutaredoxin-S10	36	0.99803	123	3.42756	1.89582	1.29662	8.12581e-13	3.81343e-12
XM_004293272.2	101302729	product=malonyl-CoA decarboxylase%2C mitochondrial	293	5.689	760	14.8327	1.52316	1.2962	9.0591e-50	1.1904e-48
XM_004305128.2	101305393	product=putative receptor protein kinase ZmPK1	40	0.576345	4	0.0579324	-2.88455	-1.29564	8.43907e-09	3.08669e-08
XM_004293716.2	101291026	product=uncharacterized protein DDB_G0282077-like	170	9.93373	42	2.4669	-1.84051	-1.29561	2.11878e-19	1.32635e-18
XM_004307881.2	101292349	product=uncharacterized LOC101292349	4	0.0652019	33	0.540696	2.91661	1.29439	3.62609e-07	1.17124e-06
XM_004307711.2	101313356	product=probable non-specific lipid-transfer protein AKCS9	21	1.05491	81	4.08998	2.0492	1.29349	6.14182e-10	2.43109e-09
XM_011464091.1	101302444	product=early nodulin-like protein 2%2C transcript variant X2	581	20.115	1437	50.008	1.45605	1.29291	9.94852e-86	2.17879e-84
XM_004287329.2	101313243	product=probable histone H2A variant 3	1221	53.2155	2916	127.747	1.40632	1.29278	5.27987e-162	2.04381e-160
XM_004293728.2	101294539	product=APO protein 1%2C chloroplastic%2C transcript variant X1	272	5.80724	708	15.194	1.52796	1.29269	9.89095e-47	1.23755e-45
XM_011459627.1	101306479	product=putative amidase C869.01%2C transcript variant X2	581	5.85153	175	1.77162	-1.57437	-1.29229	7.96391e-51	1.06414e-49
XM_011471180.1	101314505	product=probable receptor-like protein kinase At1g67000%2C transcript variant X1	116	1.76158	26	0.396878	-1.9644	-1.29203	7.7595e-15	4.03222e-14
XM_004297738.2	101306423	product=defensin Ec-AMP-D2-like	1662	90.2514	3923	214.132	1.38962	1.29201	8.40302e-213	4.28233e-211
XM_004307936.2	101312579	product=probable pectinesterase/pectinesterase inhibitor 34	6869	117.637	2392	41.1765	-1.37041	-1.29122	0	0
XM_004306234.2	101299409	product=protein TOO MANY MOUTHS	102	1.60175	22	0.347262	-2.01186	-1.28971	1.3137e-13	6.4223e-13
XM_004303430.2	101304398	product=PHD finger protein ALFIN-LIKE 4-like	340	10.6421	96	3.02036	-1.66264	-1.28854	1.16909e-32	1.08205e-31
XM_004296469.2	101302444	product=early nodulin-like protein 2%2C transcript variant X1	580	20.0992	1429	49.7763	1.45048	1.28711	1.00999e-84	2.19716e-83
XM_004300832.2	101313898	product=E3 ubiquitin-protein ligase SINAT5-like	324	5.84177	91	1.64923	-1.66966	-1.28608	2.26089e-31	2.02416e-30
XM_011460874.1	101295200	product=uncharacterized LOC101295200	367	6.75245	105	1.94189	-1.64456	-1.28566	1.23911e-34	1.19755e-33
XM_004292019.2	101312802	product=receptor-like protein kinase HAIKU2	420	4.33663	1054	10.9391	1.47643	1.28537	7.01181e-65	1.18767e-63
XM_004306563.2	101294879	product=transcription factor bHLH57-like	6927	118.245	2423	41.575	-1.36397	-1.28524	0	0
XM_011466970.1	101300825	product=uncharacterized LOC101300825	2390	48.3132	5552	112.812	1.36673	1.28505	9.12087e-292	6.10203e-290
XM_004300531.2	101314758	product=STS14 protein	455	21.7033	134	6.42477	-1.605	-1.28481	3.29667e-41	3.64537e-40
XM_004287866.2	101307148	product=probable terpene synthase 9	36	0.671751	122	2.28826	1.88414	1.28423	1.27099e-12	5.9136e-12
XM_004291400.2	101308439	product=myosin-6	1084	14.3001	2585	34.2776	1.40411	1.28363	1.78642e-143	6.18035e-142
XM_004307544.2	101312196	product=glycine-rich protein A3-like	1226	45.3862	2909	108.247	1.39696	1.28353	8.56561e-160	3.26395e-158
XM_004297617.2	101293582	product=uncharacterized LOC101293582	545	21.4462	1344	53.1608	1.45171	1.28326	6.46616e-80	1.32874e-78
XM_004298288.2	101299085	product=alpha/beta hydrolase domain-containing protein 17B	105	2.33224	23	0.513514	-1.99188	-1.28283	8.3092e-14	4.10459e-13
XM_004308951.2	101293536	product=uncharacterized LOC101293536	181	3.79407	485	10.219	1.5681	1.28213	5.8461e-34	5.56919e-33
XM_004294045.2	101292096	product=uncharacterized LOC101292096	2576	31.4717	871	10.6962	-1.41221	-1.28204	3.62663e-189	1.65274e-187
XM_011472395.1	101301922		NA	3195	NA	3195	-3.07131	-1.28173	NA	NA
XM_011466176.1	101315153	product=cell division cycle-associated protein 7-like%2C transcript variant X1	27	0.578463	2	0.0430706	-3.07131	-1.28173	6.86661e-07	2.15246e-06
XM_011462059.1	101293381	product=transcription factor DYSFUNCTIONAL TAPETUM 1	27	0.992558	2	0.0739029	-3.07131	-1.28173	6.86661e-07	2.15246e-06
XM_004301193.2	101315153	product=cell division cycle-associated protein 7-like%2C transcript variant X2	27	0.579811	2	0.043171	-3.07131	-1.28173	6.86661e-07	2.15246e-06
XM_011462199.1	101294539	product=APO protein 1%2C chloroplastic%2C transcript variant X2	270	6.09636	698	15.8417	1.51808	1.2817	1.27212e-45	1.55645e-44
XM_004290656.2	101304531	product=gibberellin receptor GID1B-like	8255	161.902	2909	57.348	-1.35335	-1.28138	0	0
XM_011460723.1	101314719	product=uncharacterized LOC101314719%2C transcript variant X3	576	4.70807	1414	11.6174	1.44524	1.28121	4.85701e-83	1.03735e-81
XM_011460722.1	101314719	product=uncharacterized LOC101314719%2C transcript variant X2	576	4.70807	1413	11.6092	1.44422	1.28017	2.37612e-83	5.08973e-82
XM_004294751.2	101291997	product=bZIP transcription factor TRAB1%2C transcript variant X1	906	15.3308	2172	36.9432	1.41159	1.28002	5.52236e-122	1.65801e-120
XM_004295609.2	101315132	product=cytochrome P450 CYP749A22-like	57	1.1251	177	3.51179	1.76883	1.27986	4.72766e-16	2.60943e-15
XM_004287585.2	101295364	product=uncharacterized LOC101295364	233	6.18065	609	16.2381	1.53338	1.2797	1.08203e-40	1.18707e-39
XM_004291172.2	101314719	product=uncharacterized LOC101314719%2C transcript variant X1	576	4.70807	1412	11.601	1.4432	1.27913	3.39752e-83	7.26698e-82
XM_004299182.2	101290861	product=protein ASPARTIC PROTEASE IN GUARD CELL 1	4640	79.2058	1610	27.6251	-1.3754	-1.27905	0	0
XM_004307804.2	101292845	product=S-norcoclaurine synthase-like%2C transcript variant X1	1473	65.753	3456	155.069	1.38086	1.27713	1.31759e-183	5.81467e-182
XM_004307786.2	101312773	product=maltose excess protein 1%2C chloroplastic-like	1183	22.8253	2798	54.2649	1.39232	1.27681	6.57565e-153	2.39958e-151
XM_004293602.2	101305144	product=GDSL esterase/lipase At1g29670-like	1882	40.415	629	13.5773	-1.42853	-1.27588	6.40312e-141	2.17922e-139
XM_004302031.2	101312740	product=ethylene-responsive transcription factor 1B-like	187	6.23418	497	16.6546	1.55649	1.2747	2.36895e-34	2.27225e-33
XM_004304412.2	101296693	product=nucleolar protein 58-like	931	22.5988	2219	54.1417	1.40324	1.27331	2.48168e-123	7.54363e-122
XM_004298561.2	101314749	product=DNA-damage-repair/toleration protein DRT100	421	5.75565	124	1.70401	-1.60424	-1.27179	2.96786e-38	3.07087e-37
XM_004299568.2	101309636	product=probable mitochondrial chaperone BCS1-B	177	3.52582	45	0.901028	-1.80109	-1.27165	1.24347e-19	7.8809e-19
XM_004292390.2	101307278	product=peroxidase 19	177	3.1528	45	0.805702	-1.80109	-1.27165	1.24347e-19	7.8809e-19
XM_011467950.1	101292932	product=ACT domain-containing protein ACR1%2C transcript variant X2	20	0.365609	77	1.41487	2.04416	1.27113	1.67404e-09	6.42831e-09
XM_004302179.2	101309943	product=4-alpha-glucanotransferase%2C chloroplastic/amyloplastic	1191	17.5586	2804	41.5524	1.38569	1.27049	5.46875e-152	1.98822e-150
XM_004307721.2	101291672	product=LRR receptor-like serine/threonine-protein kinase GSO1	262	3.5412	72	0.978183	-1.69802	-1.27009	2.94771e-26	2.29481e-25
XM_011467829.1	101296790	product=cyclic nucleotide-gated ion channel 1-like%2C transcript variant X3	519	7.77903	1272	19.1639	1.44273	1.26999	6.40833e-81	1.33654e-79
XR_906036.1	101293299	product=probable cyclic nucleotide-gated ion channel 20%2C chloroplastic%2C transcript variant X2	581	9.03139	178	2.78123	-1.54998	-1.26961	7.73206e-50	1.01785e-48
XM_004292728.2	101301845	product=putative sodium-coupled neutral amino acid transporter 11	154	2.78618	38	0.691053	-1.83964	-1.26872	9.68587e-18	5.67083e-17
XM_011468923.1	101310342	product=trihelix transcription factor GT-2-like	365	6.25089	914	15.7338	1.47301	1.2682	2.60438e-56	3.85824e-55
XM_004304339.2	101297858	product=leucine-rich repeat receptor-like tyrosine-protein kinase At2g41820	683	6.61675	213	2.07416	-1.52531	-1.26783	4.64153e-57	6.94997e-56
XM_004309945.2	101306590	product=cytochrome P450 71B34-like	283	6.12724	722	15.7128	1.49918	1.26773	3.48128e-46	4.31523e-45
XM_011472712.1	105353491	product=zinc finger BED domain-containing protein RICESLEEPER 1-like	357	3.9708	895	10.0063	1.47462	1.2676	2.79928e-55	4.05073e-54
XM_004307803.2	101292845	product=S-norcoclaurine synthase-like%2C transcript variant X2	1487	26.3217	3463	61.6163	1.37014	1.26678	1.03825e-185	4.63778e-184
XM_004291174.2	101315305	product=ATP-dependent zinc metalloprotease FTSH%2C chloroplastic	4669	64.2365	10539	145.746	1.32546	1.26667	0	0
XM_004299442.2	101295335	product=transcriptional activator Myb	338	6.98186	97	2.01403	-1.63935	-1.26634	6.30566e-32	5.76161e-31
XM_011467827.1	101296790	product=cyclic nucleotide-gated ion channel 1-like%2C transcript variant X1	527	8.34681	1287	20.4893	1.4376	1.26607	5.75074e-75	1.10937e-73
XM_011465102.1	101309250	product=formin-like protein 8%2C transcript variant X2	485	5.70059	146	1.72493	-1.57406	-1.26604	2.04343e-42	2.31638e-41
XM_004305008.2	101314302	product=protein SCARECROW	940	12.7989	302	4.13324	-1.4838	-1.26591	4.78291e-75	9.2633e-74
XM_004302145.2	101298618	product=bifunctional aspartate aminotransferase and glutamate/aspartate-prephenate aminotransferase	2248	46.2542	764	15.8011	-1.40467	-1.26569	3.36535e-164	1.32369e-162
XM_004306469.2	101290985	product=DNA-damage-repair/toleration protein DRT100	4323	110.923	1511	38.9708	-1.36483	-1.2653	7.85921e-302	5.45731e-300
XM_011464554.1	101314368	product=cation/H(+) antiporter 19	0	0	16	0.184619	4.23854	1.26499	3.52917e-05	9.31123e-05
XM_011461436.1	101311157	product=uncharacterized LOC101311157	0	0	16	0.561018	4.23854	1.26499	3.52917e-05	9.31123e-05
XM_004301988.2	101299777	product=uncharacterized LOC101299777	37	1.12748	123	3.76749	1.85735	1.26343	1.80088e-12	8.29607e-12
XM_011469195.1	101301509	product=uncharacterized LOC101301509%2C transcript variant X1	293	2.45867	743	6.26702	1.49056	1.26282	4.94733e-47	6.23937e-46
XM_004303729.2	101301509	product=uncharacterized LOC101301509%2C transcript variant X2	293	2.46035	743	6.2713	1.49056	1.26282	4.94733e-47	6.23937e-46
XM_004292547.2	101314628	product=antifungal protein ginkbilobin-2-like	107	5.26036	24	1.18599	-1.95995	-1.26248	8.54751e-14	4.2216e-13
XM_004297711.2	101296857	product=BTB/POZ domain-containing protein At3g19850-like	676	11.8861	1624	28.7025	1.41429	1.26224	5.00663e-92	1.1765e-90
XM_004302021.2	101309845	product=GRF1-interacting factor 1	217	6.64548	58	1.78539	-1.73446	-1.26183	1.25497e-22	8.78926e-22
XM_004303207.2	101305490	product=zinc finger protein 1	163	4.79656	41	1.21273	-1.81416	-1.26182	2.24085e-18	1.34117e-17
XM_011470995.1	105349305	product=probable receptor-like protein kinase At5g39020%2C transcript variant X1	50	0.737434	6	0.0889495	-2.71399	-1.26145	5.5395e-10	2.20026e-09
XM_004295946.2	101293967	product=protein NRT1/ PTR FAMILY 2.7-like%2C transcript variant X1	50	0.895813	6	0.108053	-2.71399	-1.26145	5.5395e-10	2.20026e-09
XM_011469906.1	101310445	product=pentatricopeptide repeat-containing protein At3g26782%2C mitochondrial	220	3.21131	59	0.865667	-1.72993	-1.26092	7.61913e-23	5.37725e-22
XM_004299357.2	101293685	product=LRR receptor-like serine/threonine-protein kinase FEI 2	100	1.68749	22	0.373167	-1.98357	-1.25966	3.5339e-13	1.69289e-12
XM_004287937.2	101304511	product=cytochrome P450 81E8-like	2056	27.0743	4714	62.397	1.34779	1.25959	3.82274e-242	2.18358e-240
XM_011463029.1	101297226	product=serine/arginine repetitive matrix protein 1%2C transcript variant X2	3015	32.3257	6835	73.6612	1.33159	1.25855	0	0
XM_011463028.1	101297226	product=serine/arginine repetitive matrix protein 1%2C transcript variant X1	3015	32.2882	6835	73.5756	1.33159	1.25855	0	0
XR_184848.2	101314289	ncrna_class=lncRNA	93	5.67726	20	1.22723	-2.01119	-1.25735	1.45196e-12	6.7289e-12
XM_004298545.2	101309250	product=formin-like protein 8%2C transcript variant X1	485	5.30331	147	1.6157	-1.56428	-1.257	9.53167e-43	1.09104e-41
XM_004293751.2	101301082	product=YTH domain-containing family protein 2	5905	84.2272	13174	188.881	1.30863	1.25624	0	0
XM_004287723.2	101312761	product=NEP1-interacting protein 1-like%2C transcript variant X1	391	9.82742	966	24.405	1.45374	1.25535	3.33397e-58	5.0883e-57
XM_011467948.1	101292932	product=ACT domain-containing protein ACR1%2C transcript variant X1	21	0.401402	79	1.51784	2.01357	1.25516	1.58597e-09	6.09892e-09
XM_011463716.1	101312761	product=NEP1-interacting protein 1-like%2C transcript variant X2	392	9.86601	968	24.4889	1.45305	1.25489	3.92149e-58	5.98186e-57
XM_004297396.2	101297236	product=1-aminocyclopropane-1-carboxylate oxidase homolog 4-like	430	11.5392	1055	28.4576	1.44393	1.25442	1.32716e-62	2.18727e-61
XM_004291712.2	101312895	product=glucan endo-1%2C3-beta-glucosidase-like	273	7.33671	692	18.6932	1.48976	1.25395	6.75688e-44	7.92305e-43
XM_004289863.2	101301443	product=histone H1.2	3300	91.555	1151	32.0983	-1.36768	-1.25382	1.34556e-231	7.39754e-230
XR_907327.1	101302008	ncrna_class=lncRNA	12	0.865871	56	4.06162	2.28353	1.25361	2.26034e-08	8.02652e-08
XM_011466685.1	105351659	product=putative calcium-binding protein CML19	16	0.445579	65	1.81952	2.10801	1.25356	1.35472e-08	4.88161e-08
	101308140		61	1.7235	184	5.22564	1.72826	1.25282	4.42801e-16	2.44773e-15
XM_011472671.1	105353475	product=putative glycine-rich cell wall structural protein 1	33	2.98227	3	0.272517	-2.93638	-1.25268	1.03375e-07	3.49874e-07
XM_004295045.2	101311457	product=glucan endo-1%2C3-beta-glucosidase%2C basic isoform	20	0.574325	76	2.19372	2.02555	1.25106	2.69357e-09	1.01989e-08
XM_004296296.2	101301283	product=linoleate 13S-lipoxygenase 2-1%2C chloroplastic-like	24933	300.236	9170	110.993	-1.29189	-1.25102	0	0
XM_004290723.2	101301350	product=desiccation-related protein PCC13-62-like	1166	39.084	385	12.9718	-1.44505	-1.25094	1.85834e-89	4.2543e-88
XM_011469101.1	101304606	product=aminopeptidase M1-like	1361	16.2455	3144	37.7222	1.35841	1.25026	1.93209e-164	7.61991e-163
XM_004296728.2	101313790	product=LEC14B homolog	225	3.64505	578	9.41213	1.50832	1.24957	1.02571e-37	1.04945e-36
XM_004296144.2	101291038	product=F-box/kelch-repeat protein At2g44130-like	80	1.69136	231	4.90905	1.66921	1.24899	9.14814e-19	5.57082e-18
XR_905288.1	101312426	product=cytochrome c oxidase copper chaperone 1-like%2C transcript variant X2	60	2.65582	181	8.05315	1.72814	1.24892	7.61727e-16	4.14925e-15
XM_011463511.1	101312426	product=cytochrome c oxidase copper chaperone 1-like%2C transcript variant X1	60	2.7482	181	8.33326	1.72814	1.24892	7.61727e-16	4.14925e-15
XM_004300290.2	101313315	product=bax inhibitor 1-like	1043	34.9293	2430	81.7996	1.37051	1.24726	1.5492e-129	4.87605e-128
XM_004307844.2	101306175	product=uncharacterized LOC101306175	150	2.5558	400	6.8507	1.56013	1.24648	4.14875e-28	3.39868e-27
XM_004307194.2	101299900	product=agamous-like MADS-box protein AGL15	129	3.31229	31	0.800091	-1.87129	-1.2458	1.90174e-15	1.01765e-14
XM_011459914.1	101291019	product=pentatricopeptide repeat-containing protein At5g40410%2C mitochondrial	61	1.03696	183	3.12697	1.72044	1.24461	6.71623e-16	3.66764e-15
XM_011464222.1	101299371	product=glycine-rich cell wall structural protein-like	233	6.73812	64	1.86038	-1.69692	-1.2443	1.52941e-23	1.10413e-22
XM_011472589.1	101291590	product=growth-regulating factor 7%2C transcript variant X1	248	4.81272	69	1.34595	-1.67964	-1.24224	1.2351e-24	9.17536e-24
XM_004309527.2	101291590	product=growth-regulating factor 7%2C transcript variant X2	248	4.82034	69	1.34807	-1.67964	-1.24224	1.2351e-24	9.17536e-24
XM_011472098.1	101301826		NA	2716	NA	2716	2.0529	1.24214	NA	NA
XM_004297098.2	101307389	product=transcription factor bHLH30%2C transcript variant X1	1242	28.2857	415	9.50021	-1.42809	-1.24072	1.07664e-93	2.58173e-92
XM_011471759.1	101306872	product=structural maintenance of chromosomes protein 6A%2C transcript variant X1	269	2.47652	76	0.703304	-1.65895	-1.24045	3.60679e-26	2.79714e-25
XM_004308990.2	101306872	product=structural maintenance of chromosomes protein 6A%2C transcript variant X2	269	2.47838	76	0.703831	-1.65895	-1.24045	3.60679e-26	2.79714e-25
XM_004307766.2	101305219	product=peroxisomal membrane protein 11B	1440	44.246	486	15.0102	-1.414	-1.24041	6.84935e-107	1.82627e-105
XM_004294230.2	101300889	product=acyl-coenzyme A thioesterase 13-like	344	12.1377	101	3.5821	-1.60695	-1.24003	1.11827e-31	1.01451e-30
XM_004291138.2	101303768	product=aquaporin TIP4-1	189	6.47052	50	1.72063	-1.74635	-1.23999	4.15967e-20	2.68068e-19
XM_004305287.2	101310439	product=heme-binding-like protein At3g10130%2C chloroplastic	169	3.92153	443	10.3327	1.5361	1.2394	3.4233e-30	2.96083e-29
XM_004290021.2	101302605	product=nucleolar complex protein 4 homolog	270	4.14289	678	10.457	1.4762	1.23876	2.04414e-42	2.3163e-41
XM_004287940.2	101305403	product=cytochrome P450 81E8-like	51	0.930458	157	2.87916	1.75442	1.2382	2.86121e-14	1.44855e-13
XM_004290380.2	101291392	product=LRR receptor-like serine/threonine-protein kinase GSO2	715	6.54825	229	2.10811	-1.48725	-1.23784	9.56096e-58	1.44564e-56
XM_004309082.2	101314040	product=cyclic nucleotide-gated ion channel 1-like	44	0.736764	5	0.084156	-2.75581	-1.23656	3.89496e-09	1.45951e-08
XM_004297453.2	101314456	product=mitochondrial phosphate carrier protein 2%2C mitochondrial	78	1.62028	224	4.67716	1.66108	1.23536	4.04367e-18	2.39959e-17
XM_004307466.2	101312096	product=glucan endo-1%2C3-beta-glucosidase-like	1418	31.066	480	10.5703	-1.40969	-1.23496	7.20419e-105	1.88823e-103
XR_905448.1	101314274	ncrna_class=lncRNA	19	0.855387	0	0	-4.17085	-1.23415	6.78472e-06	1.92779e-05
XM_011470435.1	105352777	product=uncharacterized LOC105352777%2C transcript variant X3	19	0.37604	1	0.0198939	-3.17085	-1.23415	1.5011e-05	4.11128e-05
XM_011470434.1	105352777	product=uncharacterized LOC105352777%2C transcript variant X2	19	0.37008	1	0.0195786	-3.17085	-1.23415	1.5011e-05	4.11128e-05
XM_004309354.1	101301632	partial=true	19	0.707638	0	0	-4.17085	-1.23415	6.78472e-06	1.92779e-05
XM_004306720.2	101295853	product=uncharacterized LOC101295853	19	0.5627	1	0.0297689	-3.17085	-1.23415	1.5011e-05	4.11128e-05
XM_004289495.2	101291287	product=TMV resistance protein N-like	19	0.304328	0	0	-4.17085	-1.23415	6.78472e-06	1.92779e-05
XR_907704.1	101302867	product=putative UDP-rhamnose	NA	2282	NA	2282	-1.47155	-1.23273	NA	NA
XM_011460261.1	101295096	product=filament-like plant protein 7%2C transcript variant X2	2381	25.8819	831	9.07982	-1.36644	-1.23263	2.33881e-167	9.37538e-166
XM_004303298.2	101310042	product=gamma-tubulin complex component 3	208	2.42853	532	6.24355	1.50171	1.23263	1.27881e-34	1.23551e-33
XM_011460260.1	101295096	product=filament-like plant protein 7%2C transcript variant X1	2380	26.0786	831	9.15268	-1.36583	-1.23202	1.09679e-153	4.02748e-152
XM_004306668.2	101302867	product=putative UDP-rhamnose	NA	2468	NA	2468	-1.46955	-1.23115	NA	NA
XM_004303558.2	101295638	product=pyrroline-5-carboxylate reductase	118	3.58095	320	9.76126	1.58269	1.23111	2.36232e-23	1.69167e-22
XM_004302739.2	101307808	product=histone H4	1139	75.1285	381	25.2607	-1.42631	-1.23086	5.85612e-86	1.28927e-84
XM_011460586.1	105349835	product=zinc finger CCCH domain-containing protein 20	1335	33.0582	3044	75.7674	1.3396	1.23019	1.74594e-155	6.50905e-154
XM_011470707.1	101292644	product=putative receptor-like protein kinase At3g47110%2C transcript variant X1	54	0.574955	7	0.0749165	-2.63028	-1.23017	2.43122e-10	9.91539e-10
XM_004295635.2	101299074	product=cytochrome P450 CYP72A219-like	2529	51.2354	5646	114.975	1.30943	1.22951	2.59109e-275	1.647e-273
XM_011464641.1	101307389	product=transcription factor bHLH30%2C transcript variant X2	1149	30.969	385	10.4305	-1.42388	-1.22939	1.67539e-86	3.71362e-85
XM_004309501.2	101307655	product=mavicyanin	108	4.94676	25	1.151	-1.91667	-1.22937	1.41372e-13	6.90439e-13
XM_011461571.1	101312514	product=pleiotropic drug resistance protein 2-like	3894	32.178	8599	71.425	1.29379	1.22922	0	0
XM_004301536.2	101315248	product=probable polyol transporter 4	384	6.34352	933	15.4924	1.42964	1.22895	1.09863e-54	1.56658e-53
XM_004310078.2	101298485	product=leucine-rich repeat extensin-like protein 6	608	28.6675	193	9.14708	-1.49931	-1.2285	6.47566e-50	8.55143e-49
XM_004307397.2	101290808	product=serine/arginine-rich splicing factor RS2Z32-like%2C transcript variant X1	1068	30.4791	2453	70.3667	1.34995	1.22787	4.64783e-138	1.54592e-136
XM_004307362.2	101305005	product=elongation factor 1-alpha	16013	333.574	5947	124.525	-1.27778	-1.227	0	0
XM_004299747.2	101290864	product=nucleolar and coiled-body phosphoprotein 1	134	2.96923	357	7.95146	1.55808	1.22667	3.13571e-25	2.3688e-24
XM_004299552.2	101304097	product=acetyl-CoA carboxylase 1-like%2C transcript variant X2	19728	94.85	7359	35.5641	-1.27146	-1.22577	0	0
XM_011466270.1	101304097	product=acetyl-CoA carboxylase 1-like%2C transcript variant X1	19571	97.6608	7300	36.6159	-1.27155	-1.22567	0	0
XM_004288062.2	101293719	product=ABC transporter G family member 5	5229	92.3381	1892	33.5833	-1.31506	-1.22562	0	0
XM_011464482.1	101302825	product=glutamine synthetase leaf isozyme%2C chloroplastic	15790	326.897	5869	122.133	-1.27659	-1.22547	0	0
XM_004299483.2	101308287	product=phosphomethylethanolamine N-methyltransferase-like	742	13.8596	1730	32.4811	1.37125	1.22537	6.62363e-93	1.56779e-91
XM_004287173.2	101292242	product=leucine-rich repeat receptor-like protein kinase TDR	314	3.26225	92	0.960758	-1.60897	-1.2253	3.9789e-29	3.3504e-28
XM_004288528.2	101293821	product=butyrate--CoA ligase AAE11%2C peroxisomal-like%2C transcript variant X2	367	5.85797	110	1.76487	-1.57807	-1.22499	1.17278e-22	8.22352e-22
XM_004294990.2	101294740	product=galactinol synthase 2-like	315	8.18505	774	20.2158	1.44535	1.22449	1.60658e-46	1.9999e-45
XM_011461084.1	101302723	product=plant intracellular Ras-group-related LRR protein 6%2C transcript variant X1	457	7.72952	141	2.39715	-1.53838	-1.22408	2.96814e-39	3.15128e-38
XM_004298780.2	101315235	product=probable polygalacturonase%2C transcript variant X1	1737	34.5076	600	11.9813	-1.38091	-1.22396	9.58086e-125	2.94594e-123
XM_011469193.1	101300646	product=uncharacterized LOC101300646%2C transcript variant X2	26	0.375064	2	0.0290002	-3.01885	-1.22253	1.25463e-06	3.83921e-06
XM_004303726.2	101300646	product=uncharacterized LOC101300646%2C transcript variant X1	26	0.391132	2	0.0302426	-3.01885	-1.22253	1.25463e-06	3.83921e-06
XM_004291804.2	101291694	product=jasmonate O-methyltransferase-like	26	0.598043	2	0.0462412	-3.01885	-1.22253	1.25463e-06	3.83921e-06
XM_011465616.1	101315235	product=probable polygalacturonase%2C transcript variant X2	1745	33.8637	604	11.7819	-1.37797	-1.22149	1.55486e-124	4.77589e-123
XM_004293370.2	101306120	product=glucan endo-1%2C3-beta-glucosidase 8	229	4.37266	576	11.0553	1.47802	1.22065	2.17387e-36	2.16449e-35
XM_004309375.2	101315300	product=MLO-like protein 6	219	2.59226	553	6.5796	1.48346	1.22056	3.22868e-35	3.15472e-34
XM_011461085.1	101302723	product=plant intracellular Ras-group-related LRR protein 6%2C transcript variant X2	453	7.67243	140	2.38343	-1.53592	-1.22046	7.5306e-39	7.90079e-38
XM_004291177.2	101291398	product=1%2C4-alpha-glucan-branching enzyme 1%2C chloroplastic/amyloplastic-like	1266	17.3465	430	5.92225	-1.40458	-1.22004	2.07582e-93	4.95339e-92
XM_004300501.2	101304972	product=dof zinc finger protein DOF3.7-like	785	20.1422	257	6.6284	-1.45608	-1.21966	1.67646e-61	2.72011e-60
XR_904273.1	105349729	product=uncharacterized LOC105349729%2C transcript variant X3	84	2.63145	18	0.566798	-2.01039	-1.21944	1.61117e-11	7.03923e-11
XM_004305943.2	101296701	product=probable long-chain-alcohol O-fatty-acyltransferase 5	104	2.30725	24	0.535195	-1.91931	-1.21935	3.68621e-13	1.76268e-12
XM_011461308.1	105350006	product=CBL-interacting serine/threonine-protein kinase 5	2137	29.2266	4760	65.4364	1.30608	1.21915	2.04508e-231	1.12223e-229
XM_011466120.1	101301500	product=probable pectinesterase 68	289	6.92392	84	2.02289	-1.61944	-1.21905	3.58979e-27	2.86236e-26
XM_004295183.2	101308450	product=multiple C2 and transmembrane domain-containing protein 1-like%2C transcript variant X1	2401	29.7676	847	10.5554	-1.35102	-1.21828	2.24125e-166	8.9476e-165
XM_004300963.2	101311383	partial=true	1432	61.3956	3230	139.199	1.32402	1.21817	1.55536e-161	6.00483e-160
XM_004291223.2	101304934	product=putative glutathione-specific gamma-glutamylcyclotransferase 2	3999	114.48	1442	41.4936	-1.31985	-1.21756	4.41256e-267	2.75696e-265
XM_011470996.1	105349305	product=probable receptor-like protein kinase At5g39020%2C transcript variant X2	38	0.91219	4	0.0965164	-2.8124	-1.21519	2.71778e-08	9.59104e-08
XM_011469491.1	101290817	product=UPF0481 protein At3g47200-like%2C transcript variant X2	38	0.83005	4	0.0878253	-2.8124	-1.21519	2.71778e-08	9.59104e-08
XM_011469489.1	101290817	product=UPF0481 protein At3g47200-like%2C transcript variant X1	38	0.824191	4	0.0872054	-2.8124	-1.21519	2.71778e-08	9.59104e-08
XM_004298844.2	101310991	product=uncharacterized LOC101310991	38	2.16892	4	0.229488	-2.8124	-1.21519	2.71778e-08	9.59104e-08
XM_011471407.1	101290808	product=serine/arginine-rich splicing factor RS2Z32-like%2C transcript variant X2	1206	29.8038	2732	67.8647	1.33014	1.21495	2.16903e-127	6.74724e-126
XM_004308266.2	101297390	product=DEAD-box ATP-dependent RNA helicase 31-like	2784	36.4786	6131	80.7494	1.28976	1.21341	6.75758e-291	4.51065e-289
XM_004291936.2	101305822	product=protein ASPARTIC PROTEASE IN GUARD CELL 2-like	2903	55.3457	6385	122.359	1.28795	1.21316	4.19763e-302	2.92169e-300
XM_011462269.1	105350379	product=probable LRR receptor-like serine/threonine-protein kinase At4g08850	207	2.00116	57	0.553894	-1.69138	-1.21299	4.833e-21	3.20918e-20
XM_004303783.2	101293612	product=glucan endo-1%2C3-beta-glucosidase%2C basic isoform-like	1169	34.6209	397	11.8183	-1.40459	-1.21266	2.05155e-86	4.53368e-85
XM_004299520.2	101294075	product=myb-like protein Q	323	4.18761	96	1.25105	-1.58886	-1.21225	1.88641e-29	1.60132e-28
XM_011469186.1	101297280	product=uncharacterized LOC101297280	77	1.46045	16	0.305039	-2.04686	-1.21211	6.57004e-11	2.76691e-10
XM_011462620.1	101291903	product=protein NRT1/ PTR FAMILY 8.1-like%2C transcript variant X1	1842	30.092	4102	67.3591	1.3057	1.21211	2.30205e-192	1.07074e-190
XM_011470838.1	101296321	product=myeloid leukemia factor 1%2C transcript variant X3	142	3.04406	36	0.775722	-1.79934	-1.2118	4.30159e-15	2.26199e-14
XM_011470837.1	101296321	product=myeloid leukemia factor 1%2C transcript variant X1	142	3.03699	36	0.773922	-1.79934	-1.2118	4.30159e-15	2.26199e-14
XM_004304051.2	101305493	product=uncharacterized LOC101305493	231	7.02173	65	1.98603	-1.66251	-1.2118	8.52683e-23	6.00629e-22
XM_004309623.2	101301160	product=probable leucine-rich repeat receptor-like serine/threonine-protein kinase At5g15730	708	15.4104	231	5.05395	-1.46058	-1.21161	6.8778e-56	1.00972e-54
XM_004304120.2	101301122	product=ribosomal RNA-processing protein 7 homolog	1024	25.5112	2330	58.3481	1.3364	1.21156	5.11335e-119	1.50589e-117
XM_004300666.2	101309453	product=flavonoid 3'-monooxygenase-like	6	0.133836	40	0.896849	2.70128	1.21135	1.06843e-07	3.61234e-07
XM_004308101.2	101312492	product=uncharacterized LOC101312492	70	3.13611	201	9.05166	1.65954	1.21108	2.04746e-16	1.14607e-15
XM_004296672.2	101293286	product=25S rRNA (cytosine-C(5))-methyltransferase nop2%2C transcript variant X2	1536	23.013	3439	51.7908	1.31337	1.21102	1.93135e-169	7.91531e-168
XM_011464298.1	101293286	product=25S rRNA (cytosine-C(5))-methyltransferase nop2%2C transcript variant X1	1555	22.6175	3480	50.8784	1.31274	1.21101	2.72704e-171	1.13188e-169
XM_004302801.2	101301403	product=uncharacterized LOC101301403	395	13.0856	946	31.5013	1.40894	1.21058	4.27637e-54	6.02165e-53
XM_011471713.1	101293831	product=histone acetyltransferase GCN5-like%2C transcript variant X7	20	0.659601	74	2.45314	1.98758	1.21007	6.9237e-09	2.55041e-08
XM_004287194.2	101298453	product=uncharacterized LOC101298453	1074	37.5713	2436	85.6582	1.33185	1.20986	1.32527e-123	4.03684e-122
XM_004295897.2	101300994	product=protein UPSTREAM OF FLC	340	6.00401	102	1.81051	-1.57605	-1.20982	1.35377e-30	1.18735e-29
XM_011463609.1	101308450	product=multiple C2 and transmembrane domain-containing protein 1-like%2C transcript variant X2	2360	30.3407	837	10.8163	-1.3433	-1.20967	2.52556e-162	9.80218e-161
XM_004287155.2	101310345	product=dihydrofolate reductase-like	5989	198.583	2201	73.358	-1.29266	-1.20952	0	0
XM_004291300.2	101303004	product=synaptotagmin-2%2C transcript variant X1	4426	75.6579	9613	165.174	1.26989	1.20914	0	0
XM_004292107.2	101299832	product=TMV resistance protein N-like%2C transcript variant X1	287	1.87994	84	0.55307	-1.60946	-1.20869	8.54195e-27	6.73768e-26
XM_004302971.2	101302764	product=uncharacterized LOC101302764	1934	26.8891	680	9.50315	-1.35553	-1.20763	4.85103e-135	1.58296e-133
XM_004290027.2	101304339	product=mitochondrial phosphate carrier protein 1%2C mitochondrial	60	1.24287	176	3.66459	1.68795	1.20669	6.03838e-15	3.15575e-14
XM_004307976.2	101299532	product=ABC transporter C family member 10-like	1549	11.6894	3456	26.2152	1.30833	1.20635	3.98829e-169	1.63225e-167
XM_004293391.2	101311654	product=fasciclin-like arabinogalactan protein 7%2C transcript variant X2	1180	30.7699	403	10.563	-1.3965	-1.20584	1.50257e-86	3.33433e-85
XM_004293390.2	101311654	product=fasciclin-like arabinogalactan protein 7%2C transcript variant X1	1180	29.7393	403	10.2092	-1.3965	-1.20584	1.50257e-86	3.33433e-85
XM_011460262.1	101295096	product=filament-like plant protein 7%2C transcript variant X3	2233	27.0392	792	9.63984	-1.34316	-1.20583	1.58723e-167	6.37132e-166
XM_004303411.2	101299017	product=LRR receptor-like serine/threonine-protein kinase ERECTA	3235	32.4748	1167	11.7756	-1.31909	-1.20548	2.51943e-216	1.31131e-214
XM_004306738.2	101301236	product=beta-amylase 2%2C chloroplastic	562	9.12858	1312	21.421	1.37274	1.20539	4.48331e-71	8.25735e-70
	101310467		1549	30.2192	3452	67.6926	1.30666	1.20466	1.48504e-168	6.04391e-167
XM_004288111.2	101308800	product=uncharacterized LOC101308800	32	1.05066	3	0.0990088	-2.89332	-1.20434	1.87013e-07	6.20055e-07
XM_004299249.2	101311574	product=mitochondrial import receptor subunit TOM5 homolog	19	1.7514	71	6.57856	1.99908	1.20403	1.18027e-08	4.27298e-08
XM_004294858.2	101300324	product=farnesyl pyrophosphate synthase 1-like	461	11.1828	1088	26.5288	1.38812	1.20388	2.1319e-60	3.39886e-59
XM_004299512.2	101291826	product=MATE efflux family protein 6-like	642	13.1436	1486	30.58	1.36059	1.20369	4.95237e-79	1.00847e-77
XM_004301526.2	101312064	product=zinc-finger homeodomain protein 4-like	1328	23.7467	458	8.23207	-1.3827	-1.20343	7.05562e-96	1.73594e-94
XM_011469457.1	105352404	product=uncharacterized LOC105352404	14	0.272691	58	1.13556	2.12683	1.20276	6.22396e-08	2.13836e-07
XM_011460748.1	101290931	product=uncharacterized aarF domain-containing protein kinase At4g31390%2C chloroplastic%2C transcript variant X1	563	7.94746	1311	18.6021	1.36908	1.20181	1.05883e-70	1.94039e-69
XM_004296287.2	101297526	product=serine/threonine-protein kinase UCNL	504	12.4888	160	3.98519	-1.49814	-1.20143	1.12761e-41	1.25924e-40
XM_004289798.2	101305899	product=cleavage and polyadenylation specificity factor subunit 6	814	22.2158	271	7.4344	-1.43212	-1.20123	2.39648e-62	3.94296e-61
XM_011466619.1	101291175	product=laccase-15-like%2C transcript variant X2	57	0.995116	168	2.94814	1.69398	1.20114	2.04077e-14	1.03929e-13
XM_011470709.1	101292644	product=putative receptor-like protein kinase At3g47110%2C transcript variant X3	53	0.692242	7	0.0919008	-2.60381	-1.20088	4.27168e-10	1.70896e-09
XM_011470708.1	101292644	product=putative receptor-like protein kinase At3g47110%2C transcript variant X2	53	0.580915	7	0.0771213	-2.60381	-1.20088	4.27168e-10	1.70896e-09
XM_004290699.2	101294717	product=serine/threonine protein phosphatase 2A 57 kDa regulatory subunit B' beta isoform-like	178	3.09583	48	0.839146	-1.71803	-1.20052	1.0926e-18	6.63827e-18
XM_004287617.2	101305000	product=uncharacterized LOC101305000	297	9.32784	88	2.77809	-1.59236	-1.19981	2.63531e-27	2.10875e-26
XM_004294200.2	101291903	product=protein NRT1/ PTR FAMILY 8.1-like%2C transcript variant X2	1819	30.7518	4017	68.2619	1.29362	1.19931	1.25614e-199	6.08409e-198
XM_011471172.1	101309290	product=uncharacterized LOC101309290%2C transcript variant X2	4000	81.2152	8647	176.474	1.26308	1.19915	0	0
XM_004307150.2	101309290	product=uncharacterized LOC101309290%2C transcript variant X1	4024	81.4334	8695	176.87	1.26244	1.19869	0	0
XM_004302597.2	101312457	product=probable anion transporter 3%2C chloroplastic	211	2.80965	59	0.789698	-1.66995	-1.19838	4.29419e-21	2.85335e-20
XM_004306624.2	101314212	product=uncharacterized LOC101314212	125	3.17203	31	0.79073	-1.8262	-1.19819	1.26292e-14	6.49821e-14
XM_004299299.2	101301198	product=expansin-A1-like	369	9.60173	113	2.95557	-1.54741	-1.19789	2.66616e-32	2.45449e-31
XM_004298672.2	101308284	product=leucoanthocyanidin dioxygenase	7840	180.221	2927	67.6317	-1.27004	-1.19773	0	0
XM_011465133.1	101315336	product=nicotinamidase 2-like%2C transcript variant X2	718	10.2572	237	3.40324	-1.44395	-1.1977	4.99506e-48	6.37501e-47
XR_904789.1	105350281	ncrna_class=lncRNA	96	3.95054	22	0.910011	-1.92527	-1.19764	2.50923e-12	1.14538e-11
XM_004290095.2	101299433	product=F-box/WD-40 repeat-containing protein At3g52030-like%2C transcript variant X1	96	1.77606	22	0.409117	-1.92527	-1.19764	4.07911e-12	1.84062e-11
XM_004293336.2	101296355	product=CASP-like protein 2B1	944	29.2495	319	9.93518	-1.41116	-1.1976	1.30883e-70	2.39406e-69
XM_011472161.1	105353207	product=RING-H2 finger protein ATL70-like	48	4.09685	6	0.514754	-2.65628	-1.19746	1.73226e-09	6.64318e-09
XM_011468960.1	101303073		NA	4113	NA	4113	-2.65628	-1.19746	NA	NA
XM_011464470.1	105351070	product=uncharacterized LOC105351070	48	1.12228	6	0.141011	-2.65628	-1.19746	1.73226e-09	6.64318e-09
XM_011463055.1	101293967	product=protein NRT1/ PTR FAMILY 2.7-like%2C transcript variant X2	48	0.843987	6	0.106044	-2.65628	-1.19746	1.73226e-09	6.64318e-09
XM_004306164.2	101298352	product=uncharacterized LOC101298352	128	2.91152	32	0.731643	-1.81575	-1.19626	7.74213e-15	4.0239e-14
XM_011470199.1	101310049	product=CTL-like protein DDB_G0274487	645	10.4721	211	3.44348	-1.45639	-1.19606	6.61024e-51	8.86093e-50
XM_004304990.2	101309074	product=calponin homology domain-containing protein DDB_G0272472-like	764	11.6646	254	3.89806	-1.43388	-1.1956	9.80079e-59	1.51313e-57
XM_004297746.2	101309246	product=putative Myb family transcription factor At1g14600	299	5.86729	89	1.75548	-1.58589	-1.19522	2.43041e-27	1.94639e-26
XM_004297372.2	101315229	product=vacuolar iron transporter 1-like	736	21.5549	244	7.18284	-1.4378	-1.19489	7.41305e-57	1.10491e-55
XM_011465324.1	101304570	partial=true	4	0.130983	31	1.02036	2.82915	1.19475	1.16688e-06	3.57967e-06
XM_011460983.1	101293370	product=meiotic recombination protein SPO11-1%2C transcript variant X1	78	1.3284	218	3.73191	1.62208	1.19458	2.17623e-17	1.26203e-16
XM_004298973.2	101300145	product=MATE efflux family protein 7-like%2C transcript variant X1	143	2.7678	370	7.19845	1.51643	1.19387	5.22069e-25	3.92362e-24
XM_011464145.1	101293969	product=senescence-associated carboxylesterase 101-like%2C transcript variant X2	1056	16.1764	361	5.55857	-1.39484	-1.19354	1.49509e-77	2.99868e-76
XM_004289959.2	101307741	product=multiple C2 and transmembrane domain-containing protein 1	15	0.161012	60	0.647376	2.08182	1.19347	6.04842e-08	2.08073e-07
XM_004299832.2	101292704	product=multiple C2 and transmembrane domain-containing protein 2	3062	32.2575	6635	70.2595	1.26645	1.19344	1.36471e-304	9.61298e-303
XM_004307164.2	101314505	product=probable receptor-like protein kinase At1g67000%2C transcript variant X2	134	1.8858	34	0.480961	-1.79645	-1.19301	1.23392e-14	6.3546e-14
XM_011463343.1	105350647	product=probable WRKY transcription factor 58	382	14.6872	118	4.56032	-1.5353	-1.19262	4.77998e-33	4.4565e-32
XR_904274.1	105349729	product=uncharacterized LOC105349729%2C transcript variant X4	76	2.61648	16	0.553685	-2.02825	-1.19208	2.96184e-10	1.19877e-09
XM_004291195.2	101296540	product=alcohol dehydrogenase-like 7	307	8.03949	92	2.42168	-1.57655	-1.19172	8.05673e-28	6.53979e-27
XM_011462544.1	105350483	product=mediator of RNA polymerase II transcription subunit 19a-like	6319	267.5	13467	573.04	1.24262	1.19159	0	0
XM_004302118.2	101315158	product=serine carboxypeptidase-like 20	325	6.2413	779	15.0372	1.40968	1.19134	6.36651e-45	7.65523e-44
XM_004309439.2	101313666	product=calnexin homolog	5711	108.936	12183	233.59	1.244	1.19034	0	0
XM_004301770.2	101310525	product=3-oxoacyl-[acyl-carrier-protein] synthase I%2C chloroplastic-like	118	1.82044	29	0.44971	-1.83685	-1.18993	5.36962e-14	2.67732e-13
XM_004290406.2	101300410	product=laccase-14-like	728	12.2401	242	4.08986	-1.43388	-1.1899	4.61369e-56	6.79713e-55
XM_004294621.2	101299651	product=thiamine thiazole synthase%2C chloroplastic-like	140	3.59223	362	9.3365	1.51535	1.18941	1.7659e-24	1.30573e-23
XM_004287113.2	101298535	product=BTB/POZ and TAZ domain-containing protein 3	582	12.542	1340	29.026	1.35282	1.18797	9.05716e-71	1.66501e-69
XM_004302102.2	101310035	product=CBS domain-containing protein CBSX6%2C transcript variant X1	1121	21.4051	2500	47.9833	1.30751	1.18776	1.04142e-120	3.09499e-119
XM_011469291.1	101312365	product=3-hydroxyisobutyryl-CoA hydrolase-like protein 5%2C transcript variant X2	1214	27.2774	421	9.50836	-1.37456	-1.18756	3.788e-87	8.45069e-86
XM_011461972.1	101310965	product=cytokinin riboside 5'-monophosphate phosphoribohydrolase LOG1-like	375	7.21653	116	2.24385	-1.53315	-1.18756	2.0261e-32	1.86877e-31
XM_004303836.2	101312365	product=3-hydroxyisobutyryl-CoA hydrolase-like protein 5%2C transcript variant X1	1214	27.1945	421	9.47948	-1.37456	-1.18756	3.788e-87	8.45069e-86
XM_011460305.1	101311719	product=uncharacterized LOC101311719	370	6.92866	876	16.4889	1.39224	1.187	3.0083e-49	3.90053e-48
XM_004300841.2	101291729	product=probable inactive receptor kinase At2g26730	239	3.73562	69	1.08406	-1.62653	-1.18698	6.49494e-23	4.59491e-22
XM_011470916.1	101314325	product=protein VASCULAR ASSOCIATED DEATH 1%2C chloroplastic%2C transcript variant X3	1292	17.2166	2863	38.3481	1.29839	1.18667	2.11896e-138	7.06795e-137
XM_004307643.2	101291670	product=laccase-5-like	105	1.83051	25	0.438088	-1.8764	-1.18663	5.99697e-13	2.838e-12
XM_011462015.1	101294536	product=equilibrative nucleotide transporter 3-like%2C transcript variant X1	164	3.15768	416	8.05113	1.48866	1.18601	1.6718e-24	1.23678e-23
XM_011470915.1	101314325	product=protein VASCULAR ASSOCIATED DEATH 1%2C chloroplastic%2C transcript variant X1	1293	17.1308	2863	38.1277	1.29727	1.18558	1.31052e-138	4.3838e-137
XM_011462407.1	101315420	product=cytochrome P450 CYP749A22-like	87	2.8667	238	7.88277	1.59251	1.18558	5.52964e-18	3.26486e-17
XM_004308449.2	101314325	product=protein VASCULAR ASSOCIATED DEATH 1%2C chloroplastic%2C transcript variant X2	1293	17.1926	2863	38.2652	1.29727	1.18558	2.11896e-138	7.06795e-137
XM_011471940.1	105353157	product=spidroin-1-like	343	6.14528	105	1.89093	-1.54727	-1.18515	3.72492e-30	3.21886e-29
XM_004309998.2	101298282	product=3-oxoacyl-[acyl-carrier-protein] reductase 4-like	320	6.70775	97	2.0438	-1.56064	-1.18491	1.46473e-28	1.21589e-27
XM_004306407.2	101296999	product=uncharacterized LOC101296999	19440	224.768	40613	472.001	1.21395	1.18473	0	0
XM_004299027.2	101290860	product=ribulose bisphosphate carboxylase small chain 1%2C chloroplastic	75626	3027.64	156421	6294.59	1.19955	1.1847	0	0
XM_011460803.1	101303004	product=synaptotagmin-2%2C transcript variant X2	3684	79.4358	7896	171.137	1.25072	1.18401	0	0
XM_011471060.1	105352932	product=uncharacterized LOC105352932	1029	33.8456	2297	75.943	1.30881	1.18388	3.45202e-113	9.7264e-112
XM_004307549.2	101313929	product=UDP-glycosyltransferase 76F1-like	4176	89.5731	1545	33.3108	-1.28285	-1.18364	2.79243e-268	1.75593e-266
XM_011464787.1	105351154	product=pentatricopeptide repeat-containing protein At2g02750	340	5.46724	808	13.0599	1.39745	1.18361	7.4092e-46	9.0956e-45
XM_004296800.2	101311752	product=uncharacterized LOC101311752	452	18.2942	1053	42.8393	1.36937	1.18294	3.40484e-57	5.11389e-56
XM_004290120.2	101306973	product=putative quinone-oxidoreductase homolog%2C chloroplastic	97	2.55834	261	6.91935	1.56979	1.1827	3.90215e-19	2.41539e-18
XM_004305864.2	101292443	product=receptor-like protein 12	82	0.691081	18	0.152485	-1.97603	-1.18265	4.35605e-11	1.85181e-10
XM_004296520.2	101293969	product=senescence-associated carboxylesterase 101-like%2C transcript variant X1	1064	16.2921	367	5.64861	-1.382	-1.18208	3.50551e-77	6.99264e-76
XR_904507.1	101293370	product=meiotic recombination protein SPO11-1%2C transcript variant X2	83	1.31628	228	3.63449	1.59796	1.18195	7.4009e-17	4.20696e-16
XM_011459840.1	101299433	product=F-box/WD-40 repeat-containing protein At3g52030-like%2C transcript variant X2	95	1.86023	22	0.433017	-1.91032	-1.18171	2.50923e-12	1.14538e-11
XM_004293465.2	101310293	product=sucrose nonfermenting 4-like protein	208	3.12268	514	7.75652	1.45215	1.1816	9.28545e-32	8.43957e-31
XM_004288546.2	101299235	product=glutamine synthetase nodule isozyme	10933	278.204	4161	106.429	-1.24239	-1.18153	0	0
XM_011467762.1	101310035	product=CBS domain-containing protein CBSX6%2C transcript variant X2	1116	22.0165	2478	49.1388	1.30121	1.18111	8.55727e-123	2.58776e-121
XM_004294027.2	101311738	product=bystin	293	5.76489	703	13.9033	1.41084	1.1811	8.86615e-41	9.74511e-40
XM_004293306.2	101312321	product=tropinone reductase homolog At1g07440-like	352	10.5348	833	25.0592	1.39146	1.1811	7.01222e-47	8.82263e-46
XM_011467224.1	101291245	product=membrane-anchored ubiquitin-fold protein 6	155	5.99697	394	15.3227	1.49138	1.18039	7.87098e-26	6.04887e-25
XM_004293696.2	101310005	product=probable RNA 3'-terminal phosphate cyclase-like protein	186	3.50979	464	8.80087	1.46527	1.17993	2.90005e-29	2.45182e-28
XM_004307101.2	101294013	product=SEC12-like protein 1	345	8.51454	816	20.2429	1.39064	1.17817	6.43655e-46	7.9115e-45
XM_011459479.1	101314036	product=LL-diaminopimelate aminotransferase%2C chloroplastic	2813	59.3025	1029	21.8051	-1.2989	-1.17774	1.58804e-184	7.03997e-183
XM_011459697.1	105349627	product=uncharacterized LOC105349627	24	1.01598	83	3.53177	1.89954	1.17736	3.21332e-09	1.21059e-08
XM_004291614.2	101304937	product=protochlorophyllide reductase%2C chloroplastic	89388	2165.5	35078	854.186	-1.19841	-1.1773	0	0
XM_004299436.2	101293299	product=probable cyclic nucleotide-gated ion channel 20%2C chloroplastic%2C transcript variant X1	675	9.01753	225	3.02138	-1.42962	-1.17669	6.30238e-52	8.59371e-51
XM_011460749.1	101290931	product=uncharacterized aarF domain-containing protein kinase At4g31390%2C chloroplastic%2C transcript variant X2	487	9.66963	1124	22.433	1.35605	1.1761	6.40056e-60	1.01108e-58
XR_904508.1	101293370	product=meiotic recombination protein SPO11-1%2C transcript variant X4	80	1.32692	220	3.66788	1.59913	1.17574	4.47939e-17	2.5717e-16
XM_004293282.2	101305827	product=plastid-lipid-associated protein%2C chloroplastic	1196	28.5612	2638	63.3227	1.29165	1.17548	1.01536e-126	3.14846e-125
XM_004295354.2	101293080	product=uncharacterized LOC101293080	1663	36.4552	594	13.0886	-1.33262	-1.17415	8.26922e-114	2.35027e-112
XM_004291237.2	101308926	product=probable sarcosine oxidase	126	2.08147	32	0.531359	-1.79321	-1.17244	1.97178e-14	1.00608e-13
XM_011459296.1	101305912	product=probable disease resistance protein At4g27220%2C transcript variant X2	340	2.70822	105	0.840687	-1.53463	-1.17207	1.20053e-29	1.02503e-28
XM_011463661.1	105350752	product=ankyrin repeat-containing protein At5g02620-like	75	0.955555	16	0.204905	-2.00939	-1.17177	1.79642e-10	7.384e-10
XM_004302261.2	101309944	product=DEAD-box ATP-dependent RNA helicase 3%2C chloroplastic	7209	89.0181	15121	187.682	1.21966	1.17175	0	0
XM_004309490.2	101304056	product=cytochrome P450 78A9-like	3049	55.0009	1124	20.3806	-1.28781	-1.1717	1.62015e-197	7.71954e-196
XM_004289576.2	101307350	product=deSI-like protein At4g17486%2C transcript variant X2	354	9.16613	110	2.86296	-1.52618	-1.17138	1.54322e-30	1.35028e-29
XM_004305582.2	101291949	product=uncharacterized LOC101291949	678	7.13238	227	2.40032	-1.4233	-1.1713	7.49632e-52	1.02122e-50
XM_004288126.2	101312963	product=ABC transporter G family member 11-like	735	11.5667	248	3.92294	-1.41248	-1.1709	1.71494e-55	2.49766e-54
XM_004293823.2	101296466	product=auxin-repressed 12.5 kDa protein	21644	1033.74	44739	2147.84	1.19861	1.17086	0	0
XM_004293610.2	101308262	product=uncharacterized LOC101308262	117	1.97617	305	5.17819	1.52582	1.1706	3.98807e-21	2.65234e-20
XM_004292631.2	101295307	product=uncharacterized protein At1g04910	258	3.4492	621	8.34506	1.41504	1.1706	2.04282e-36	2.03539e-35
XM_011462000.1	105350300	product=dynein light chain 1%2C cytoplasmic-like	748	31.3409	253	10.6554	-1.40906	-1.16975	2.92021e-56	4.32395e-55
XM_004304346.2	101299791	product=translation factor GUF1 homolog%2C chloroplastic	2784	40.9783	5949	88.0174	1.24629	1.16957	1.32636e-265	8.19966e-264
XM_004308093.2	101309880	product=subtilisin-like protease	821	10.566	280	3.62214	-1.39749	-1.16952	6.72756e-61	1.08021e-59
XM_011466450.1	101310523	product=protein NRT1/ PTR FAMILY 5.10-like	143	2.30247	364	5.89112	1.49291	1.16951	4.88495e-24	3.57412e-23
XM_004299351.2	101292119	product=homeobox-leucine zipper protein HAT5-like	1794	41.1879	3883	89.6095	1.26464	1.16937	1.03351e-178	4.44063e-177
XM_011462476.1	101312033	product=TPR repeat-containing thioredoxin TTL1	2080	24.5811	755	8.9686	-1.30974	-1.16867	1.48935e-138	4.97633e-137
XM_011459295.1	101305912	product=probable disease resistance protein At4g27220%2C transcript variant X1	342	2.61458	106	0.814556	-1.52952	-1.16844	4.63304e-29	3.89338e-28
XM_011461900.1	101313485	product=katanin p60 ATPase-containing subunit A-like 2%2C transcript variant X2	325	7.90455	100	2.44474	-1.53944	-1.16843	1.70999e-28	1.41767e-27
XM_004293476.2	101313485	product=katanin p60 ATPase-containing subunit A-like 2%2C transcript variant X1	325	7.76623	100	2.40196	-1.53944	-1.16843	1.70999e-28	1.41767e-27
XM_004309667.2	101291887	product=uncharacterized LOC101291887	195	6.65739	55	1.88743	-1.65628	-1.16815	1.91347e-19	1.19937e-18
XM_011461323.1	105350008	product=armadillo repeat-containing kinesin-like protein 2	20	0.992508	72	3.5915	1.94859	1.16789	1.76206e-08	6.30486e-08
XM_004302902.2	101307129	product=gibberellin 3-beta-dioxygenase 1-like	20	0.480413	72	1.73843	1.94859	1.16789	1.76206e-08	6.30486e-08
XM_004290426.2	101306395	product=uncharacterized LOC101306395	260	4.53483	624	10.9399	1.41088	1.16726	2.08519e-36	2.0769e-35
XM_004298924.2	101310413	product=cell division cycle protein 48 homolog	3364	45.9054	7138	97.9092	1.23619	1.16629	0	0
XM_004297194.2	101312433	product=erlin-1	1314	31.3588	2867	68.7751	1.27606	1.165	1.24943e-134	4.06348e-133
XM_004306495.2	101298456	product=polyketide synthase 1	28311	664.888	11078	261.513	-1.20251	-1.16499	0	0
XM_004308485.2	101302019	product=probable LRR receptor-like serine/threonine-protein kinase At3g47570	47	0.466228	6	0.0598261	-2.62653	-1.16439	3.05725e-09	1.15372e-08
XM_004298514.2	101299086	product=anoctamin-like protein At1g73020%2C transcript variant X1	81	1.08171	18	0.241623	-1.95855	-1.16391	1.90939e-10	7.82967e-10
XM_004288774.2	101303649	product=F-box protein At2g17036-like%2C transcript variant X1	81	1.57771	18	0.352415	-1.95855	-1.16391	2.42919e-07	7.97651e-07
XM_004301021.1	101309840	product=receptor-like protein 2	42	0.667792	5	0.0799101	-2.69022	-1.16347	1.23168e-08	4.45193e-08
XM_011459388.1	101307350	product=deSI-like protein At4g17486%2C transcript variant X1	352	9.87735	110	3.10263	-1.51803	-1.16296	3.56001e-30	3.07816e-29
XM_004296590.2	101292296	product=3-ketoacyl-CoA thiolase 2%2C peroxisomal	1894	36.9693	4072	79.8929	1.25497	1.16214	9.14032e-185	4.06432e-183
XM_004295033.2	101307972	product=major allergen Pru ar 1-like	0	0	15	0.736337	4.15108	1.16213	6.48042e-05	0.000165819
	101295324		1	0.0317859	15	0.479254	3.15108	1.16213	0.000153199	0.000375571
XM_011469137.1	101299975	product=probable GTP diphosphokinase RSH2%2C chloroplastic%2C transcript variant X2	2719	37.975	5782	81.172	1.23929	1.1616	5.40899e-256	3.2281e-254
XM_004303647.2	101299975	product=probable GTP diphosphokinase RSH2%2C chloroplastic%2C transcript variant X1	2724	36.5763	5792	78.1736	1.23913	1.16151	1.29753e-255	7.72797e-254
XM_004294919.2	101295497	product=uncharacterized LOC101295497	1117	39.4121	2447	86.786	1.28176	1.16145	4.04325e-116	1.17306e-114
XM_004308781.2	101309781	product=ABC transporter G family member 6-like	274	2.82202	652	6.74989	1.39873	1.16098	2.01843e-37	2.05225e-36
XM_011469636.1	101294312	product=uncharacterized LOC101294312%2C transcript variant X4	25	0.569359	2	0.0457842	-2.9644	-1.16082	2.29244e-06	6.83824e-06
XM_011469624.1	101294312	product=uncharacterized LOC101294312%2C transcript variant X2	25	0.491885	2	0.0395542	-2.9644	-1.16082	2.29244e-06	6.83824e-06
XM_004288939.2	101314798	product=flavonoid 3'-monooxygenase-like	25	0.463678	2	0.037286	-2.9644	-1.16082	2.29244e-06	6.83824e-06
XM_004288013.2	101302201	product=peroxidase 10-like	25	0.530986	2	0.0426985	-2.9644	-1.16082	2.29244e-06	6.83824e-06
XM_004293494.2	101294828	product=sugar carrier protein C	1094	21.0861	2396	46.4199	1.28138	1.15981	1.10567e-113	3.13949e-112
XM_011459298.1	101305912	product=probable disease resistance protein At4g27220%2C transcript variant X3	337	2.6309	105	0.823955	-1.52188	-1.15888	1.31762e-29	1.12239e-28
XM_004290996.2	101310770	product=delta(8)-fatty-acid desaturase 1-like	528	9.63298	174	3.19091	-1.44483	-1.15853	1.3236e-41	1.47585e-40
XM_004306957.2	101296035	product=ethylene-responsive transcription factor ERF034-like	1028	26.8443	360	9.44931	-1.36009	-1.15784	4.33785e-73	8.18492e-72
XM_011470839.1	101296321	product=myeloid leukemia factor 1%2C transcript variant X4	137	3.10857	36	0.821072	-1.74799	-1.15769	4.2658e-16	2.35962e-15
XM_004306879.2	101296321	product=myeloid leukemia factor 1%2C transcript variant X2	137	3.10093	36	0.819056	-1.74799	-1.15769	4.2658e-16	2.35962e-15
XM_004288054.2	101291175	product=laccase-15-like%2C transcript variant X1	59	1.06743	168	3.05518	1.64507	1.15768	7.96255e-14	3.93601e-13
XM_004294790.2	101303886	product=2-hydroxyisoflavanone dehydratase-like	658	20.0841	222	6.81111	-1.41216	-1.15713	7.14804e-50	9.42236e-49
XM_004296939.2	101304274	product=calcium-binding protein 39	441	10.3241	1011	23.7905	1.34617	1.15697	1.9995e-53	2.78476e-52
XM_004287768.2	101300758	product=troponin I-like%2C transcript variant X1	155	3.79742	42	1.0343	-1.70806	-1.15661	2.12863e-16	1.19037e-15
XM_011462016.1	101294536	product=equilibrative nucleotide transporter 3-like%2C transcript variant X2	152	3.44892	381	8.68968	1.47112	1.15644	4.2884e-27	3.4055e-26
XM_004299440.2	101294758	product=glutamate decarboxylase 4-like	8460	170.642	17507	354.95	1.20019	1.15586	0	0
XM_004294232.2	101301471	product=uncharacterized LOC101301471	86	3.87648	231	10.4662	1.56612	1.15572	4.49131e-17	2.57804e-16
XM_004296491.2	101309628	product=uncharacterized LOC101309628	257	8.97351	77	2.70246	-1.57475	-1.15558	1.4642e-23	1.05757e-22
XM_011461650.1	101307567	product=uncharacterized LOC101307567%2C transcript variant X3	770	19.9516	1708	44.4852	1.29943	1.15504	1.49744e-87	3.35469e-86
XM_004303904.2	101308782	product=zinc transporter 5-like	36	0.923074	112	2.88663	1.7618	1.15414	1.0103e-10	4.20225e-10
XM_004302653.2	101307223	product=PRA1 family protein A1-like	887	25.9154	1953	57.3555	1.28888	1.1541	5.36206e-94	1.28791e-92
XM_011465768.1	101300145	product=MATE efflux family protein 7-like%2C transcript variant X2	130	2.63659	331	6.74786	1.49269	1.15394	5.16512e-22	3.54707e-21
XM_004301761.2	101306730	product=transcription factor MYB12-like	269	4.24048	638	10.1093	1.39393	1.15389	1.88592e-36	1.88162e-35
XM_004288940.2	101315093	product=flavonoid 3'-monooxygenase-like	772	14.3545	265	4.95285	-1.38796	-1.15354	7.09289e-57	1.05773e-55
XM_011462018.1	101294536	product=equilibrative nucleotide transporter 3-like%2C transcript variant X4	151	3.57357	378	8.992	1.4692	1.15344	2.83213e-24	2.08649e-23
XM_011462017.1	101294536	product=equilibrative nucleotide transporter 3-like%2C transcript variant X3	151	3.56214	378	8.96324	1.4692	1.15344	2.83213e-24	2.08649e-23
XM_011467915.1	105349299	product=uncharacterized LOC105349299	72	1.66026	198	4.58933	1.59788	1.15245	2.52387e-15	1.34272e-14
XM_004291391.2	101306006	product=vesicle-associated membrane protein 711	856	28.8502	1885	63.8596	1.28904	1.15187	8.15498e-91	1.89205e-89
XM_004298174.2	101305940	product=crocetin glucosyltransferase%2C chloroplastic-like	262	4.53752	79	1.37526	-1.56591	-1.15151	8.06255e-24	5.85664e-23
XM_011466355.1	101294465	product=MADS-box protein JOINTLESS-like%2C transcript variant X2	1300	42.494	2811	92.36	1.26305	1.15123	1.13326e-129	3.57074e-128
XR_904275.1	105349729	product=uncharacterized LOC105349729%2C transcript variant X5	74	2.62356	16	0.570189	-1.99028	-1.15118	1.08743e-10	4.51411e-10
XM_011468770.1	105352245	product=zinc finger BED domain-containing protein DAYSLEEPER-like	729	11.1487	1617	24.8568	1.29932	1.15097	2.82055e-79	5.75162e-78
XM_004296878.2	101310689	product=protein trichome birefringence-like 11	302	3.94867	708	9.305	1.37755	1.15035	1.82516e-39	1.94695e-38
XM_004295142.2	101293760	product=uncharacterized LOC101293760	676	5.04764	1504	11.2883	1.30361	1.14969	2.67939e-74	5.1116e-73
XR_904121.1	101311441	ncrna_class=lncRNA	18	1.13065	1	0.0631385	-3.09685	-1.14917	2.76915e-05	7.37374e-05
XM_011470159.1	101310340	product=putative cyclin-D7-1	18	0.224523	0	0	-4.09685	-1.14917	1.22162e-05	3.37901e-05
XM_011467425.1	105351860	product=proline-rich receptor-like protein kinase PERK2	18	1.18305	0	0	-4.09685	-1.14917	1.22162e-05	3.37901e-05
XM_004299742.2	101313896	product=uncharacterized LOC101313896	18	0.646242	1	0.0360879	-3.09685	-1.14917	2.76915e-05	7.37374e-05
XM_004291451.2	101299349	product=protein CUP-SHAPED COTYLEDON 1-like	18	0.337584	0	0	-4.09685	-1.14917	1.22162e-05	3.37901e-05
XM_004290481.2	101299145	product=vacuolar iron transporter homolog 2-like	18	0.612826	0	0	-4.09685	-1.14917	1.22162e-05	3.37901e-05
XM_004290326.2	101295001	product=auxin-induced protein 15A-like	18	0.588378	0	0	-4.09685	-1.14917	1.22162e-05	3.37901e-05
XM_011463356.1	101304176	product=probable disease resistance protein At4g27220%2C transcript variant X2	287	2.26066	88	0.696749	-1.54311	-1.14873	2.59896e-25	1.9684e-24
XM_011459586.1	101294226	product=putative E3 ubiquitin-protein ligase SINA-like 6%2C transcript variant X1	828	24.9834	287	8.70448	-1.37422	-1.14849	4.52973e-60	7.17485e-59
XM_004287370.2	101301808	product=uncharacterized LOC101301808	463	10.1375	1052	23.1529	1.33339	1.14841	1.27385e-54	1.81115e-53
XM_004293425.2	101297411	product=putative cyclin-D6-1	230	4.78043	68	1.42065	-1.59215	-1.1481	1.46116e-21	9.88148e-21
XM_004289813.2	101310562	product=actin-depolymerizing factor 5	1726	79.8501	3686	171.407	1.24526	1.14793	3.76742e-165	1.49589e-163
XM_011459461.1	101304939	product=uncharacterized LOC101304939%2C transcript variant X2	108	1.62736	280	4.24088	1.51732	1.1477	2.27041e-19	1.419e-18
XM_004291999.2	101304939	product=uncharacterized LOC101304939%2C transcript variant X1	108	1.6096	280	4.1946	1.51732	1.1477	2.27041e-19	1.419e-18
XM_004288250.2	101301616	product=LRR receptor-like serine/threonine-protein kinase HSL2	1443	13.173	521	4.78075	-1.31687	-1.14756	1.76994e-97	4.39529e-96
XM_004300855.2	101296108	product=uncharacterized LOC101296108	191	6.3733	465	15.5963	1.4303	1.14754	3.29269e-28	2.70799e-27
XM_004303971.2	101304203	product=CBS domain-containing protein CBSX2%2C chloroplastic-like	319	10.5774	743	24.7637	1.36831	1.14693	7.29759e-41	8.03009e-40
XR_905107.1	105350601	ncrna_class=lncRNA	96	1.26553	23	0.304767	-1.86387	-1.14671	6.62238e-12	2.95456e-11
XM_004287631.2	101309285	product=DNA repair protein RAD51 homolog 1	213	5.34627	513	12.9428	1.41524	1.14671	2.08247e-30	1.81345e-29
XM_004287266.2	101294976	product=uncharacterized LOC101294976	151	3.92639	41	1.07162	-1.70453	-1.14666	5.53103e-16	3.0374e-15
XM_011464393.1	101299464	product=monothiol glutaredoxin-S2-like	266	7.7964	628	18.5017	1.3873	1.14575	1.25677e-35	1.23498e-34
XM_004291348.2	101292082	product=protein RCC2 homolog	325	5.81149	755	13.5703	1.36459	1.14514	2.63865e-41	2.92437e-40
XM_011461676.1	101294448	product=abnormal spindle-like microcephaly-associated protein homolog	80	0.664205	18	0.150219	-1.94084	-1.14491	1.16897e-10	4.84709e-10
XM_011466805.1	101291627	product=MIP18 family protein At1g68310	152	5.77188	378	14.428	1.45974	1.14466	4.99668e-24	3.65496e-23
XM_011461326.1	101311707	product=phytochrome E-like%2C transcript variant X3	770	8.33564	266	2.89447	-1.37881	-1.14462	3.01825e-56	4.46686e-55
XM_004288068.2	101295653	product=uncharacterized LOC101295653	99	3.52005	24	0.857758	-1.84892	-1.14449	4.07931e-12	1.84043e-11
XM_011460616.1	101311442	product=squamosa promoter-binding protein 1-like	47	1.56972	138	4.63279	1.68506	1.14448	4.70976e-12	2.11639e-11
XM_004300703.2	101296295	product=molybdenum cofactor sulfurase 3-like	238	2.95271	71	0.885404	-1.57986	-1.14435	4.84415e-22	3.32977e-21
XM_004306385.2	101314497	product=probable inactive leucine-rich repeat receptor-like protein kinase At3g03770	4886	65.6781	1870	25.2667	-1.23406	-1.14339	2.29202e-297	1.58031e-295
XM_011461649.1	101307567	product=uncharacterized LOC101307567%2C transcript variant X1	837	19.471	1834	42.8847	1.28184	1.14302	2.46228e-87	5.512e-86
XM_004303321.2	101293903	product=F-box/kelch-repeat protein At1g15670-like	76	1.90112	206	5.17967	1.57778	1.1428	1.39871e-15	7.53287e-15
XM_004293618.2	101311163	product=DNA-binding protein DDB_G0278111%2C transcript variant X2	256	12.086	605	28.7102	1.38863	1.14253	3.24509e-34	3.10348e-33
XM_004293207.2	101307567	product=uncharacterized LOC101307567%2C transcript variant X2	836	19.5217	1831	42.9772	1.2812	1.14229	1.22942e-83	2.64311e-82
XM_011463191.1	101298298	product=uncharacterized LOC101298298	4	0.227603	30	1.71585	2.78335	1.14227	2.0876e-06	6.24979e-06
XM_004308254.2	101292165	product=ethylene-responsive transcription factor ERF023	1297	51.5885	467	18.6711	-1.32063	-1.142	3.67505e-88	8.29023e-87
XM_004290539.2	101292654	product=thioredoxin M-type%2C chloroplastic-like	2780	111.659	5827	235.253	1.21848	1.14145	7.64518e-250	4.46269e-248
XM_004294924.2	101296941	product=dirigent protein 22-like	808	30.9691	281	10.8259	-1.36937	-1.14117	2.13514e-58	3.27056e-57
XM_004303481.2	101295927	product=WD repeat-containing protein LWD1-like	1053	20.9304	374	7.4724	-1.33983	-1.14095	2.3779e-73	4.50126e-72
XM_004308323.2	101292644	product=putative receptor-like protein kinase At3g47110%2C transcript variant X4	51	0.871388	7	0.120221	-2.54936	-1.1405	1.31319e-09	5.0796e-09
XM_011459280.1	101303670	product=uncharacterized LOC101303670	203	6.8169	59	1.99151	-1.61446	-1.14042	1.44805e-19	9.14487e-19
XM_011466326.1	101308679	product=purine permease 3-like	226	5.31441	539	12.7402	1.40135	1.1401	2.38558e-31	2.13384e-30
XM_004290657.2	101304827	product=serine/threonine-protein phosphatase 6 regulatory ankyrin repeat subunit A-like	260	4.02631	79	1.2297	-1.5549	-1.14006	1.88873e-23	1.35784e-22
XM_011459822.1	101291118	product=formin-like protein 1	1295	12.0274	467	4.35972	-1.31841	-1.13974	7.85631e-88	1.7668e-86
XM_004307593.2	101301909	product=putative ABC1 protein At2g40090	106	1.48891	274	3.8686	1.5129	1.13973	6.58969e-19	4.04224e-18
XM_004290950.2	101296627	product=probable xyloglucan glycosyltransferase 12	1882	20.4698	694	7.58738	-1.28687	-1.13947	1.23369e-122	3.72689e-121
XM_004296109.2	101304176	product=probable disease resistance protein At4g27220%2C transcript variant X1	288	2.24789	89	0.698252	-1.53199	-1.13933	1.86897e-25	1.42288e-24
XM_004288105.2	101307047	product=ultraviolet-B receptor UVR8	798	16.7943	1748	36.9777	1.28134	1.13919	1.74955e-83	3.75859e-82
XM_004304484.2	101293911	product=ACT domain-containing protein ACR6	1252	23.9561	2687	51.6795	1.25223	1.13815	3.63717e-122	1.09425e-120
XM_004287510.2	101297577	product=GATA transcription factor 21	11703	251.17	4599	99.2139	-1.19622	-1.13804	0	0
XM_004301859.2	101294086	product=leucine-rich repeat receptor-like serine/threonine-protein kinase BAM3	1082	11.428	386	4.09798	-1.33355	-1.13761	7.57323e-75	1.45807e-73
XM_011462097.1	101311163	product=DNA-binding protein DDB_G0278111%2C transcript variant X1	257	12.0868	605	28.6004	1.38303	1.13724	1.91681e-34	1.844e-33
XM_011464017.1	101300758	product=troponin I-like%2C transcript variant X3	153	3.8666	42	1.06691	-1.68944	-1.13703	5.24189e-16	2.88538e-15
XM_011464013.1	101300758	product=troponin I-like%2C transcript variant X2	153	3.85866	42	1.06472	-1.68944	-1.13703	5.24189e-16	2.88538e-15
XM_011460561.1	105349827	product=uncharacterized LOC105349827	12	0.248294	52	1.0815	2.17856	1.13665	1.72976e-07	5.75139e-07
XM_004288170.2	101301527	product=ethylene-responsive transcription factor RAP2-4-like	1383	28.0492	502	10.2339	-1.30914	-1.13656	8.82087e-93	2.08282e-91
XM_011464785.1	101312922	product=SNF1-related protein kinase regulatory subunit gamma-1-like%2C transcript variant X2	2081	44.3526	4382	93.8768	1.22503	1.13613	3.13008e-190	1.4365e-188
XM_004298289.2	101299377	product=UDP-glycosyltransferase 89A2-like	1429	32.4244	520	11.8599	-1.30558	-1.13592	1.88862e-95	4.63115e-94
XM_004306768.2	101311901	product=uncharacterized LOC101311901	117	2.62408	298	6.7181	1.49244	1.13589	5.48726e-20	3.5223e-19
XM_011472103.1	101298181	product=traB domain-containing protein%2C transcript variant X1	346	8.90272	795	20.5614	1.34891	1.13574	1.46307e-42	1.66494e-41
XM_004304195.2	101298812	product=protein EXORDIUM-like 5	704	19.6798	1548	43.4969	1.28672	1.13556	1.05644e-74	2.03129e-73
XM_011462460.1	101309135	product=uncharacterized LOC101309135	405	9.81145	920	22.403	1.3328	1.13518	5.6901e-48	7.2589e-47
XM_011464784.1	101312922	product=SNF1-related protein kinase regulatory subunit gamma-1-like%2C transcript variant X1	2086	45.2437	4389	95.6861	1.22387	1.13507	2.96399e-190	1.36348e-188
XM_004297282.2	101312922	product=SNF1-related protein kinase regulatory subunit gamma-1-like%2C transcript variant X3	2086	44.331	4389	93.7558	1.22387	1.13507	3.13008e-190	1.4365e-188
XM_011467878.1	101301213	product=transcription factor bHLH147-like%2C transcript variant X2	1004	42.5997	357	15.2258	-1.33809	-1.13456	6.5324e-70	1.18526e-68
XM_004296831.2	101296479	product=pumilio homolog 24	275	4.29467	642	10.0779	1.37123	1.13316	1.09778e-35	1.08056e-34
XM_004299680.2	101294465	product=MADS-box protein JOINTLESS-like%2C transcript variant X1	1405	47.4837	2991	101.607	1.24059	1.13273	1.63227e-133	5.27346e-132
XM_011466356.1	101294465	product=MADS-box protein JOINTLESS-like%2C transcript variant X3	1405	47.6584	2990	101.947	1.24011	1.13224	2.2349e-133	7.21246e-132
XM_011464786.1	101312922	product=SNF1-related protein kinase regulatory subunit gamma-1-like%2C transcript variant X4	2078	47.6192	4363	100.499	1.22084	1.13184	2.82972e-188	1.27962e-186
XM_004302757.2	101313717	product=xylosyltransferase 1	792	14.3289	277	5.03742	-1.36116	-1.13117	7.84431e-57	1.16859e-55
XR_905106.1	105350601	ncrna_class=lncRNA	95	1.32632	23	0.322769	-1.84892	-1.13077	1.06818e-11	4.71472e-11
XM_004299078.2	101308177	product=heat shock 70 kDa protein 8	1030	16.216	368	5.82362	-1.33127	-1.13063	3.46001e-71	6.38066e-70
XM_011461245.1	101296927	product=tubby-like F-box protein 2%2C transcript variant X2	73	1.25484	16	0.276455	-1.97091	-1.13029	4.8735e-10	1.94284e-09
XM_004291821.2	101296927	product=tubby-like F-box protein 2%2C transcript variant X1	73	1.25718	16	0.276972	-1.97091	-1.13029	4.8735e-10	1.94284e-09
XM_011464578.1	105351095	product=uncharacterized LOC105351095	36	1.02659	4	0.114655	-2.73645	-1.13004	8.71609e-08	2.96744e-07
XM_004294682.2	101295787	product=non-specific lipid-transfer protein 1-like	36	2.1103	4	0.23569	-2.73645	-1.13004	8.71609e-08	2.96744e-07
XM_004293954.2	101313776	product=auxin-induced protein X15-like	36	1.33137	4	0.148695	-2.73645	-1.13004	8.71609e-08	2.96744e-07
XM_004291575.2	101315404	product=cytochrome P450 94C1-like	550	8.6887	186	2.95355	-1.40794	-1.12979	7.58025e-42	8.49098e-41
XM_004302969.2	101302177	product=growth-regulating factor 3	187	4.01106	54	1.16426	-1.62215	-1.12818	2.87064e-18	1.71251e-17
XM_004290260.2	101301056	product=serine/threonine-protein kinase SRK2E	1826	36.9121	3839	78.0055	1.22271	1.12782	2.23524e-166	8.93576e-165
XM_011460621.1	101312900	product=probable serine/threonine-protein kinase At1g01540	2063	38.3979	771	14.4245	-1.26769	-1.12749	1.56203e-131	4.96444e-130
XM_011468118.1	101305188	product=RING-H2 finger protein ATL74	650	12.5545	224	4.34885	-1.38165	-1.12698	6.44842e-48	8.21914e-47
XM_004287783.2	101305104	product=B-box zinc finger protein 19-like	3647	96.951	1398	37.3562	-1.23163	-1.12685	6.14195e-222	3.27828e-220
XM_004309609.2	101296449	product=thioredoxin-like protein CXXS1	145	6.80203	358	16.8808	1.44909	1.1263	1.37885e-22	9.64537e-22
XM_004291238.2	101309213	product=F-box only protein 13%2C transcript variant X1	181	3.51621	52	1.0154	-1.6288	-1.12626	1.91301e-13	9.27021e-13
XM_004298978.2	101301490	product=sec-independent protein translocase protein TATC%2C chloroplastic	537	15.1261	1191	33.7213	1.29878	1.1262	7.25127e-59	1.12307e-57
XM_011465041.1	101299086	product=anoctamin-like protein At1g73020%2C transcript variant X2	79	1.05615	18	0.241886	-1.92292	-1.12567	7.14272e-11	3.00313e-10
XM_011472104.1	101298181	product=traB domain-containing protein%2C transcript variant X2	308	8.94916	709	20.707	1.35129	1.12561	2.85498e-38	2.95721e-37
XM_011460559.1	101312984	product=tetratricopeptide repeat protein 7B%2C transcript variant X1	583	6.83504	199	2.34512	-1.39489	-1.12542	1.99034e-42	2.25708e-41
XM_004302231.2	101301213	product=transcription factor bHLH147-like%2C transcript variant X1	1039	41.8228	373	15.092	-1.3244	-1.12494	2.66131e-71	4.92014e-70
XM_004297876.2	101309049	product=dynamin-related protein 5A	58	0.672714	162	1.88867	1.61716	1.12427	4.56792e-13	2.17401e-12
XM_011472425.1	101313170	product=uncharacterized LOC101313170%2C transcript variant X2	134	1.01809	36	0.274931	-1.71628	-1.12422	1.69303e-14	8.6679e-14
XM_011472424.1	101313170	product=uncharacterized LOC101313170%2C transcript variant X1	134	1.01496	36	0.274084	-1.71628	-1.12422	1.69303e-14	8.6679e-14
XM_004308864.2	101290708	product=uncharacterized LOC101290708	116	2.19564	30	0.570774	-1.76509	-1.12393	3.40527e-13	1.6326e-12
XR_908131.1	105353129	ncrna_class=lncRNA	220	11.3293	520	26.9167	1.38832	1.12321	7.54441e-30	6.46699e-29
XM_011462006.1	101291212	product=putative PAP-specific phosphatase%2C mitochondrial	220	4.79136	520	11.3836	1.38832	1.12321	7.54441e-30	6.46699e-29
XM_004287566.2	101314122	product=protein ELF4-LIKE 3	843	35.6864	1821	77.4861	1.26129	1.12263	1.62657e-84	3.52541e-83
XM_004295059.2	101290743	product=uncharacterized LOC101290743%2C transcript variant X2	184	12.8492	442	31.0256	1.41086	1.12225	2.57356e-26	2.00674e-25
XM_004296911.2	101296480	product=phosphoglucan%2C water dikinase%2C chloroplastic	9154	84.3808	18487	171.293	1.16504	1.12224	0	0
XM_004300679.2	101313520	product=probable sodium/metabolite cotransporter BASS5%2C chloroplastic	79	1.49762	210	4.00158	1.55025	1.12197	1.93029e-15	1.03255e-14
XM_004288045.2	101313056	product=UPF0202 protein At1g10490	307	3.21397	705	7.41877	1.34782	1.12169	6.67799e-38	6.85653e-37
XM_004304241.2	101312850	product=expansin-A1	621	18.3767	214	6.36543	-1.3815	-1.12108	7.35548e-46	9.03343e-45
XM_004307196.2	101300667	product=pentatricopeptide repeat-containing protein At1g02150	1087	18.0052	2319	38.6107	1.24352	1.12104	2.03416e-104	5.30311e-103
XM_004298651.2	101301584	product=probable disease resistance protein At4g27220%2C transcript variant X1	56	0.444716	157	1.25324	1.62197	1.12104	9.06811e-13	4.24207e-12
XM_004288386.2	101297774	product=uncharacterized LOC101297774	82411	1313.15	33616	538.412	-1.14259	-1.1209	0	0
XM_004293999.2	101303198	product=GABA transporter 1	264	4.23223	613	9.8779	1.36332	1.12021	7.85494e-34	7.46105e-33
XM_004299634.2	101305758	product=28 kDa ribonucleoprotein%2C chloroplastic	1672	41.9955	3507	88.5405	1.21929	1.12011	2.07913e-151	7.52158e-150
XM_004303176.2	101296120	product=uncharacterized LOC101296120	1634	30.1845	3429	63.6706	1.22	1.11969	3.04868e-148	1.08285e-146
XM_004294109.2	101310586	product=uncharacterized LOC101310586	262	13.6254	81	4.2342	-1.53029	-1.11941	3.67078e-23	2.61651e-22
XM_004287028.2	101296889	product=probable strigolactone esterase D14 homolog	1254	36.813	2656	78.3737	1.23319	1.11896	1.56333e-117	4.56277e-116
XR_185478.2	101291011	ncrna_class=lncRNA	720	41.4806	252	14.5933	-1.35978	-1.11885	8.89046e-52	1.20946e-50
XM_011460560.1	101312984	product=tetratricopeptide repeat protein 7B%2C transcript variant X2	567	6.65168	194	2.28765	-1.39134	-1.1184	1.03023e-43	1.20466e-42
[truncated: 34,349 more rows]
