# Supplementary material for: A Transcriptomic Analysis Reveals Diverse Regulatory Networks That Respond to Cold Stress in Strawberry (Fragaria×ananassa)
Source: Int J Genomics. 2019 Aug 5;2019:7106092. doi: 10.1155/2019/7106092 (PMC6701341; doi:10.1155/2019/7106092)
Supplement: Supplementary 8 — Table S4: primer information of unique transcripts for the qRT-PCR analysis. [file 7106092.f8.xlsx]

## Sheet: Sheet1
Table S4 Primer information of unique transcripts for the qRT-PCR analysis
GeneBank	GeneID	Annotation		Forward	Reverse	length
XM_004294357.2	101290740	product=beta-glucosidase 11-like%2C transcript variant X1		GACAGCCTAAACTCTCTGCTCA	GATGTGGACCCCACAACATGG	157
XM_004306560.2	101293425	product=protein LHY-like%2C transcript variant X2		ACTACTACCAGACTCGCTCTCTT	AACACCAACCGGAATCGTCA	149
XM_011460171.1	101308922	product=protein GIGANTEA%2C transcript variant X3		AAGGTTCTGCGGTGCTTTTG	TCTCTTCAATCCGCCTCTGT	124
XM_011470586.1	101295449	product=two-component response regulator-like PRR95%2C transcript variant X2		TGAGAAACCTGTGGCAGCAT	GCTGTGAAATATCTTGAGCATAACT	204
XM_004307731.2	101295082	product=ethylene-responsive transcription factor ERF105-like		TCTTCAGGCGAGCGTAGTTG	ATGAGCCAATCGGTGAGGTG	143
XM_004298723.2	101298019	product=CBF1		CGAAGGGTTCTACGAGGACG	CCCCAGTTGATGCTGTCCAT	117
XM_004293580.2	101295689	product=glycine-rich protein 2		GTGCTTCACCTCCTACAGCC	GGACAGACCAGCCAATACTCC	122
XM_004297447.2	101312820	product=transcription factor ICE1		GCTGAGATCCGTGGTTCCAA	GCTAGGTAAGCTGGGGCAAA	235
XM_004303313.2	101314005	product=cold and drought-regulated protein CORA-like		AGGTCGTCTCAGCTCATCGT	CCGTGTCCTCCATTTCCGTG	208
XM_004288724.2	101311323	product=protein SRG1-like		TACCAGCAGGGAAGAAGACCA	CTTCAGGTACGCTCATAAGTCA	258
